# Supplementary material for: Spatio-Temporal Evolution of the Crustal Uplift in Eastern NE China: Constraint from Detrital Zircon Ages of Late Mesozoic Clastic Rocks in the Boli Basin
Source: MDPI journal article supplement (doi:10.3390/min12091166), 2022-09-15
Supplement: s1 [file s1]

**Table S1.** Detrital zircon U-Pb dating results of Late Mesozoic clastic rocks from the Boli basin, eastern NE China.

| Sp<br>ot | Th       | U        | Isotopic Ratios |                                      |                                     |        |                                     |        |                                      | Isotopic Ages (Ma)                  |            |                                     |         |        |   | Conc |
|----------|----------|----------|-----------------|--------------------------------------|-------------------------------------|--------|-------------------------------------|--------|--------------------------------------|-------------------------------------|------------|-------------------------------------|---------|--------|---|------|
|          | PP<br>m  | PP<br>m  | Th/<br>U        | <sup>207</sup> Pb/ <sup>206</sup> Pb | <sup>207</sup> Pb/ <sup>235</sup> U |        | <sup>206</sup> Pb/ <sup>238</sup> U |        | <sup>207</sup> Pb/ <sup>206</sup> Pb | <sup>207</sup> Pb/ <sup>235</sup> U |            | <sup>206</sup> Pb/ <sup>238</sup> U |         | 1<br>σ |   |      |
|          |          |          |                 |                                      | 1σ                                  | 1σ     | 1σ                                  | 1σ     |                                      | 1σ                                  | 1σ         |                                     |         |        |   |      |
|          |          |          |                 |                                      |                                     |        |                                     |        |                                      |                                     |            |                                     |         |        |   |      |
| JX12-10  | Kid      |          |                 |                                      |                                     |        |                                     |        |                                      |                                     |            |                                     |         |        |   |      |
| 32       | 89<br>5  | 21<br>70 | 0.41            | 0.0519                               | 0.00<br>23                          | 0.1252 | 0.00<br>55                          | 0.0173 | 0.00<br>05                           | 283                                 | 10<br>0    | 120                                 | 5       | 110    | 3 | 91   |
| 65       | 33<br>2  | 67<br>5  | 0.49            | 0.0512                               | 0.00<br>40                          | 0.1371 | 0.00<br>99                          | 0.0185 | 0.00<br>06                           | 250                                 | 18<br>1    | 130                                 | 9       | 118    | 4 | 90   |
|          | 19<br>7  | 28<br>8  |                 |                                      | 0.68                                | 0.0544 | 0.00<br>40                          | 0.1458 | 0.00<br>99                           | 0.0199                              | 0.00<br>06 | 387                                 | 16<br>7 | 138    | 9 | 127  |
| 21       | 75<br>4  | 10<br>4  | 0.71            | 0.0569                               | 0.00<br>72                          | 0.1498 | 0.01<br>61                          | 0.0203 | 0.00<br>09                           | 500                                 | 27<br>9    | 142                                 | 14      | 130    | 6 | 91   |
| 10       | 33<br>8  | 45<br>7  | 0.74            | 0.0522                               | 0.00<br>29                          | 0.1898 | 0.01<br>03                          | 0.0264 | 0.00<br>08                           | 295                                 | 12<br>6    | 176                                 | 9       | 168    | 5 | 94   |
| 46       | 15<br>7  | 32<br>7  | 0.48            | 0.0555                               | 0.00<br>34                          | 0.2001 | 0.01<br>19                          | 0.0265 | 0.00<br>08                           | 435                                 | 13<br>2    | 185                                 | 10      | 169    | 5 | 90   |
| 33       | 14<br>5  | 49<br>5  | 0.29            | 0.0532                               | 0.00<br>34                          | 0.1961 | 0.01<br>23                          | 0.0266 | 0.00<br>08                           | 345                                 | 14<br>6    | 182                                 | 10      | 169    | 5 | 92   |
| 3        | 50<br>1  | 61<br>4  | 0.82            | 0.0542                               | 0.00<br>27                          | 0.2014 | 0.01<br>00                          | 0.0267 | 0.00<br>08                           | 389                                 | 11<br>1    | 186                                 | 8       | 170    | 5 | 90   |
| 17       | 30<br>9  | 54<br>5  | 0.57            | 0.0483                               | 0.00<br>26                          | 0.1757 | 0.00<br>93                          | 0.0267 | 0.00<br>08                           | 117                                 | 12<br>2    | 164                                 | 8       | 170    | 5 | 96   |
| 37       | 11<br>3  | 21<br>5  | 0.53            | 0.0524                               | 0.00<br>49                          | 0.1946 | 0.01<br>66                          | 0.0268 | 0.00<br>10                           | 306                                 | 21<br>3    | 181                                 | 14      | 170    | 6 | 94   |
| 36       | 10<br>4  | 22<br>7  | 0.46            | 0.0551                               | 0.00<br>39                          | 0.2045 | 0.01<br>36                          | 0.0269 | 0.00<br>09                           | 417                                 | 15<br>9    | 189                                 | 12      | 171    | 5 | 90   |
| 49       | 76<br>5  | 18<br>5  | 0.41            | 0.0555                               | 0.00<br>48                          | 0.2033 | 0.01<br>74                          | 0.0270 | 0.00<br>10                           | 432                                 | 19<br>3    | 188                                 | 15      | 172    | 6 | 91   |
| 34       | 31<br>6  | 66<br>5  | 0.47            | 0.0548                               | 0.00<br>26                          | 0.2056 | 0.00<br>96                          | 0.0271 | 0.00<br>08                           | 467                                 | 10<br>3    | 190                                 | 8       | 172    | 5 | 90   |
| 61       | 20<br>4  | 30<br>7  | 0.66            | 0.0546                               | 0.00<br>35                          | 0.2047 | 0.01<br>21                          | 0.0271 | 0.00<br>08                           | 394                                 | 17<br>9    | 189                                 | 10      | 172    | 5 | 90   |
| 11       | 29<br>1  | 57<br>3  | 0.51            | 0.0544                               | 0.00<br>29                          | 0.2009 | 0.01<br>03                          | 0.0273 | 0.00<br>08                           | 391                                 | 12<br>0    | 186                                 | 9       | 174    | 5 | 93   |
| 1        | 77<br>92 | 92<br>92 | 0.83            | 0.0525                               | 0.00<br>68                          | 0.2096 | 0.02<br>28                          | 0.0277 | 0.00<br>11                           | 309                                 | 28<br>0    | 193                                 | 19      | 176    | 7 | 90   |

| Sp<br>ot | Th       | U        | Isotopic Ratios |                                      |                                     |        |                                     |        |                                      | Isotopic Ages (Ma)                  |            |                                     |    |        |        | Conc   |
|----------|----------|----------|-----------------|--------------------------------------|-------------------------------------|--------|-------------------------------------|--------|--------------------------------------|-------------------------------------|------------|-------------------------------------|----|--------|--------|--------|
|          | PP<br>m  | PP<br>m  | Th/<br>U        | <sup>207</sup> Pb/ <sup>206</sup> Pb | <sup>207</sup> Pb/ <sup>235</sup> U |        | <sup>206</sup> Pb/ <sup>238</sup> U |        | <sup>207</sup> Pb/ <sup>206</sup> Pb | <sup>207</sup> Pb/ <sup>235</sup> U |            | <sup>206</sup> Pb/ <sup>238</sup> U |    | 1<br>σ | 1<br>σ | e<br>% |
|          |          |          |                 |                                      | 1σ                                  | 1σ     | 1σ                                  | 1σ     |                                      | 1σ                                  | 1σ         |                                     |    |        |        |        |
|          |          |          |                 |                                      |                                     |        |                                     |        |                                      |                                     |            |                                     |    |        |        |        |
| 5        | 37<br>4  | 64<br>5  | 0.58            | 0.0549                               | 0.00<br>30                          | 0.2137 | 0.01<br>12                          | 0.0280 | 0.00<br>08                           | 409                                 | 12<br>2    | 197                                 | 9  | 178    | 5      | 90     |
| 35       | 11<br>1  | 21<br>7  | 0.51            | 0.0552                               | 0.00<br>39                          | 0.2073 | 0.01<br>34                          | 0.0281 | 0.00<br>09                           | 420                                 | 15<br>7    | 191                                 | 11 | 179    | 6      | 93     |
|          | 12       | 19<br>0  |                 |                                      | 50<br>6                             |        | 0.38                                |        | 0.0538                               |                                     | 0.00<br>26 |                                     |    |        |        |        |
| 51       | 34       | 67       | 0.51            | 0.0641                               | 0.00<br>91                          | 0.2170 | 0.02<br>50                          | 0.0285 | 0.00<br>11                           | 746                                 | 30<br>4    | 199                                 | 21 | 181    | 7      | 90     |
| 7        | 27<br>0  | 50<br>2  | 0.54            | 0.0538                               | 0.00<br>26                          | 0.2142 | 0.01<br>02                          | 0.0286 | 0.00<br>08                           | 361                                 | 11<br>1    | 197                                 | 9  | 182    | 5      | 91     |
| 13       | 11<br>0  | 21<br>2  | 0.52            | 0.0539                               | 0.00<br>37                          | 0.2113 | 0.01<br>37                          | 0.0289 | 0.00<br>09                           | 369                                 | 15<br>6    | 195                                 | 11 | 184    | 6      | 94     |
| 29       | 22<br>1  | 55<br>2  | 0.40            | 0.0522                               | 0.00<br>25                          | 0.2114 | 0.01<br>00                          | 0.0290 | 0.00<br>08                           | 295                                 | 13<br>9    | 195                                 | 8  | 184    | 5      | 94     |
| 66       | 15<br>1  | 15<br>2  | 0.99            | 0.0495                               | 0.00<br>40                          | 0.2010 | 0.01<br>51                          | 0.0305 | 0.00<br>10                           | 169                                 | 18<br>1    | 186                                 | 13 | 193    | 6      | 96     |
| 16       | 40<br>8  | 74<br>9  | 0.54            | 0.0513                               | 0.00<br>26                          | 0.2132 | 0.01<br>05                          | 0.0306 | 0.00<br>09                           | 257                                 | 84         | 196                                 | 9  | 194    | 5      | 98     |
| 59       | 19<br>2  | 39<br>5  | 0.49            | 0.0550                               | 0.00<br>33                          | 0.2304 | 0.01<br>39                          | 0.0306 | 0.00<br>09                           | 409                                 | 13<br>3    | 211                                 | 11 | 195    | 6      | 92     |
| 19       | 58<br>7  | 13<br>29 | 0.44            | 0.0555                               | 0.00<br>26                          | 0.2376 | 0.01<br>11                          | 0.0309 | 0.00<br>09                           | 435                                 | 13<br>6    | 216                                 | 9  | 196    | 6      | 90     |
| 57       | 36<br>5  | 10<br>14 | 0.36            | 0.0544                               | 0.00<br>25                          | 0.2293 | 0.01<br>02                          | 0.0310 | 0.00<br>09                           | 387                                 | 10<br>4    | 210                                 | 8  | 197    | 5      | 93     |
| 64       | 38<br>1  | 56<br>6  | 0.67            | 0.0551                               | 0.00<br>29                          | 0.2401 | 0.01<br>26                          | 0.0313 | 0.00<br>09                           | 417                                 | 11<br>6    | 218                                 | 10 | 199    | 6      | 90     |
| 2        | 15<br>6  | 24<br>3  | 0.64            | 0.0549                               | 0.00<br>35                          | 0.2396 | 0.01<br>53                          | 0.0313 | 0.00<br>10                           | 409                                 | 14<br>4    | 218                                 | 13 | 199    | 6      | 90     |
| 24       | 10<br>43 | 15<br>52 | 0.67            | 0.0526                               | 0.00<br>22                          | 0.2302 | 0.00<br>96                          | 0.0314 | 0.00<br>09                           | 322                                 | 94         | 210                                 | 8  | 199    | 5      | 94     |
| 6        | 47<br>4  | 11<br>90 | 0.40            | 0.0539                               | 0.00<br>25                          | 0.2460 | 0.01<br>09                          | 0.0319 | 0.00<br>09                           | 365                                 | 11<br>0    | 223                                 | 9  | 202    | 6      | 90     |
| 27       | 50       | 82       | 0.61            | 0.0535                               | 0.00<br>66                          | 0.2321 | 0.02<br>79                          | 0.0321 | 0.00<br>13                           | 350                                 | 28<br>1    | 212                                 | 23 | 204    | 8      | 96     |
| 22       | 40<br>3  | 83<br>6  | 0.48            | 0.0562                               | 0.00<br>29                          | 0.2516 | 0.01<br>23                          | 0.0323 | 0.00<br>09                           | 457                                 | 11<br>7    | 228                                 | 10 | 205    | 6      | 89     |

| Spot | Th   | U    | Isotopic Ratios |                                      |                                     |        |                                     |        |                                      | Isotopic Ages (Ma)                  |     |                                     |    |      |     | Conc |
|------|------|------|-----------------|--------------------------------------|-------------------------------------|--------|-------------------------------------|--------|--------------------------------------|-------------------------------------|-----|-------------------------------------|----|------|-----|------|
|      | ppm  | ppm  | Th/<br>U        | <sup>207</sup> Pb/ <sup>206</sup> Pb | <sup>207</sup> Pb/ <sup>235</sup> U |        | <sup>206</sup> Pb/ <sup>238</sup> U |        | <sup>207</sup> Pb/ <sup>206</sup> Pb | <sup>207</sup> Pb/ <sup>235</sup> U |     | <sup>206</sup> Pb/ <sup>238</sup> U |    | Disc | e % |      |
|      |      |      |                 |                                      | 1σ                                  | 1σ     | 1σ                                  | 1σ     |                                      | 1σ                                  | 1σ  |                                     |    |      |     |      |
|      |      |      |                 |                                      |                                     |        |                                     |        |                                      |                                     |     |                                     |    |      |     |      |
| 56   | 497  | 1339 | 0.37            | 0.0552                               | 0.0026                              | 0.2446 | 0.0111                              | 0.0325 | 0.0009                               | 420                                 | 101 | 222                                 | 9  | 206  | 6   | 92   |
| 50   | 127  | 303  | 0.42            | 0.0551                               | 0.0037                              | 0.2515 | 0.0162                              | 0.0333 | 0.0010                               | 417                                 | 152 | 228                                 | 13 | 211  | 6   | 92   |
|      | 73   | 3    |                 |                                      | 37                                  |        | 62                                  |        | 10                                   |                                     | 2   |                                     |    |      |     |      |
| 41   | 161  | 291  | 0.55            | 0.0554                               | 0.0047                              | 0.2583 | 0.0199                              | 0.0340 | 0.0012                               | 428                                 | 187 | 233                                 | 16 | 215  | 7   | 92   |
|      | 1    | 1    |                 |                                      | 47                                  |        | 99                                  |        | 12                                   |                                     | 7   |                                     |    |      |     |      |
| 43   | 541  | 281  | 0.19            | 0.0529                               | 0.0037                              | 0.2750 | 0.0187                              | 0.0378 | 0.0011                               | 324                                 | 155 | 247                                 | 15 | 239  | 7   | 97   |
|      | 1    | 1    |                 |                                      | 37                                  |        | 87                                  |        | 11                                   |                                     | 5   |                                     |    |      |     |      |
| 67   | 173  | 301  | 0.57            | 0.0574                               | 0.0035                              | 0.3207 | 0.0190                              | 0.0406 | 0.0014                               | 506                                 | 133 | 282                                 | 15 | 257  | 9   | 90   |
|      | 3    | 1    |                 |                                      | 35                                  |        | 90                                  |        | 14                                   |                                     | 3   |                                     |    |      |     |      |
| 69   | 391  | 1083 | 0.36            | 0.0553                               | 0.0023                              | 0.3204 | 0.0127                              | 0.0421 | 0.0012                               | 433                                 | 99  | 282                                 | 10 | 266  | 7   | 94   |
|      | 1    | 83   |                 |                                      | 23                                  |        | 27                                  |        | 12                                   |                                     | 99  |                                     |    |      |     |      |
| 28   | 197  | 288  | 0.68            | 0.0535                               | 0.0029                              | 0.3140 | 0.0168                              | 0.0424 | 0.0012                               | 350                                 | 129 | 277                                 | 13 | 268  | 8   | 96   |
|      | 7    | 8    |                 |                                      | 29                                  |        | 68                                  |        | 12                                   |                                     | 9   |                                     |    |      |     |      |
| 44   | 989  | 209  | 0.47            | 0.0590                               | 0.0033                              | 0.4000 | 0.0217                              | 0.0492 | 0.0015                               | 565                                 | 120 | 342                                 | 16 | 310  | 9   | 90   |
|      | 1    | 9    |                 |                                      | 33                                  |        | 17                                  |        | 15                                   |                                     | 0   |                                     |    |      |     |      |
| 4    | 575  | 115  | 0.50            | 0.0495                               | 0.0034                              | 0.4003 | 0.0251                              | 0.0594 | 0.0019                               | 172                                 | 36  | 342                                 | 18 | 372  | 11  | 91   |
|      | 1    | 5    |                 |                                      | 34                                  |        | 51                                  |        | 19                                   |                                     | 36  |                                     |    |      |     |      |
| 18   | 238  | 1020 | 0.23            | 0.0761                               | 0.0028                              | 1.7320 | 0.0608                              | 0.1660 | 0.0045                               | 1098                                | 68  | 1021                                | 23 | 990  | 25  | 96   |
|      | 1    | 20   |                 |                                      | 28                                  |        | 08                                  |        | 45                                   |                                     | 68  |                                     |    |      |     |      |
| 8    | 176  | 403  | 0.44            | 0.0562                               | 0.0034                              | 0.2073 | 0.0117                              | 0.0262 | 0.0008                               | 461                                 | 137 | 191                                 | 10 | 167  | 5   | 86   |
|      | 1    | 3    |                 |                                      | 34                                  |        | 17                                  |        | 08                                   |                                     | 137 |                                     |    |      |     |      |
| 39   | 200  | 260  | 0.77            | 0.0613                               | 0.0061                              | 0.2107 | 0.0184                              | 0.0259 | 0.0010                               | 650                                 | 217 | 194                                 | 15 | 165  | 6   | 83   |
|      | 0    | 0    |                 |                                      | 61                                  |        | 84                                  |        | 10                                   |                                     | 7   |                                     |    |      |     |      |
| 62   | 193  | 324  | 0.59            | 0.0617                               | 0.0035                              | 0.2777 | 0.0148                              | 0.0329 | 0.0010                               | 661                                 | 94  | 249                                 | 12 | 209  | 6   | 82   |
|      | 3    | 4    |                 |                                      | 35                                  |        | 48                                  |        | 10                                   |                                     | 94  |                                     |    |      |     |      |
| 25   | 734  | 1256 | 0.58            | 0.0602                               | 0.0035                              | 0.1593 | 0.0093                              | 0.0190 | 0.0006                               | 613                                 | 127 | 150                                 | 8  | 121  | 4   | 78   |
|      | 4    | 56   |                 |                                      | 35                                  |        | 93                                  |        | 06                                   |                                     | 127 |                                     |    |      |     |      |
| 42   | 252  | 484  | 0.52            | 0.1094                               | 0.0391                              | 0.2459 | 0.0454                              | 0.0282 | 0.0021                               | 1791                                | 665 | 223                                 | 37 | 179  | 13  | 78   |
|      | 1    | 48   |                 |                                      | 91                                  |        | 54                                  |        | 21                                   |                                     | 5   |                                     |    |      |     |      |
| 52   | 1728 | 1380 | 1.25            | 0.0641                               | 0.0027                              | 0.3136 | 0.0131                              | 0.0354 | 0.0010                               | 746                                 | 89  | 277                                 | 10 | 224  | 6   | 78   |
|      | 1    | 80   |                 |                                      | 27                                  |        | 31                                  |        | 10                                   |                                     | 89  |                                     |    |      |     |      |
| 48   | 6575 | 1275 | 0.05            | 0.0685                               | 0.0031                              | 0.3670 | 0.0161                              | 0.0386 | 0.0011                               | 883                                 | 94  | 317                                 | 12 | 244  | 7   | 73   |
|      | 1    | 75   |                 |                                      | 31                                  |        | 61                                  |        | 11                                   |                                     | 94  |                                     |    |      |     |      |
| 53   | 155  | 506  | 0.31            | 0.0680                               | 0.0039                              | 0.3040 | 0.0177                              | 0.0325 | 0.0010                               | 878                                 | 119 | 270                                 | 14 | 206  | 6   | 73   |
|      | 1    | 6    |                 |                                      | 39                                  |        | 77                                  |        | 10                                   |                                     | 9   |                                     |    |      |     |      |

| Spot      | Th U |      | Th/U | Isotopic Ratios                      |                                     |        |                                     |        |                                      | Isotopic Ages (Ma)                  |     |                                     |    |     |    | Concordance % |
|-----------|------|------|------|--------------------------------------|-------------------------------------|--------|-------------------------------------|--------|--------------------------------------|-------------------------------------|-----|-------------------------------------|----|-----|----|---------------|
|           | ppm  | ppm  |      | <sup>207</sup> Pb/ <sup>206</sup> Pb | <sup>207</sup> Pb/ <sup>235</sup> U |        | <sup>206</sup> Pb/ <sup>238</sup> U |        | <sup>207</sup> Pb/ <sup>206</sup> Pb | <sup>207</sup> Pb/ <sup>235</sup> U |     | <sup>206</sup> Pb/ <sup>238</sup> U |    |     |    |               |
|           |      |      |      |                                      | 1σ                                  | 1σ     | 1σ                                  | 1σ     |                                      | 1σ                                  | 1σ  | 1σ                                  | 1σ |     |    |               |
|           |      |      |      |                                      |                                     |        |                                     |        |                                      |                                     |     |                                     |    |     |    |               |
| 23        | 91   | 1063 | 0.09 | 0.0775                               | 0.0065                              | 0.2717 | 0.0215                              | 0.0264 | 0.0011                               | 1133                                | 167 | 244                                 | 17 | 168 | 7  | 63            |
| 9         | 92   | 217  | 0.42 | 0.0773                               | 0.0058                              | 0.2950 | 0.0215                              | 0.0280 | 0.0009                               | 1128                                | 152 | 262                                 | 17 | 178 | 6  | 61            |
| 45        | 59   | 88   | 0.68 | 0.0822                               | 0.0101                              | 0.2748 | 0.0285                              | 0.0261 | 0.0010                               | 1251                                | 242 | 247                                 | 23 | 166 | 6  | 61            |
| 47        | 166  | 234  | 0.71 | 0.0819                               | 0.0070                              | 0.3872 | 0.0304                              | 0.0346 | 0.0013                               | 1244                                | 170 | 332                                 | 22 | 219 | 8  | 59            |
| 58        | 85   | 102  | 0.83 | 0.0934                               | 0.0150                              | 0.2161 | 0.0315                              | 0.0184 | 0.0009                               | 1498                                | 307 | 199                                 | 26 | 118 | 5  | 48            |
| 20        | 137  | 322  | 0.43 | 0.0959                               | 0.0094                              | 0.3290 | 0.0227                              | 0.0258 | 0.0009                               | 1546                                | 185 | 289                                 | 17 | 164 | 6  | 45            |
| 26        | 314  | 851  | 0.37 | 0.0933                               | 0.0048                              | 0.3335 | 0.0170                              | 0.0257 | 0.0008                               | 1495                                | 98  | 292                                 | 13 | 163 | 5  | 43            |
| 55        | 290  | 304  | 0.96 | 0.0974                               | 0.0099                              | 0.3607 | 0.0391                              | 0.0274 | 0.0010                               | 1576                                | 191 | 313                                 | 29 | 174 | 6  | 43            |
| 14        | 3631 | 3487 | 1.04 | 0.0985                               | 0.0039                              | 0.3423 | 0.0135                              | 0.0253 | 0.0007                               | 1595                                | 79  | 299                                 | 10 | 161 | 5  | 40            |
| 63        | 232  | 529  | 0.44 | 0.1006                               | 0.0074                              | 0.4022 | 0.0298                              | 0.0289 | 0.0011                               | 1635                                | 137 | 343                                 | 22 | 184 | 7  | 39            |
| 54        | 396  | 744  | 0.53 | 0.0986                               | 0.0101                              | 0.5072 | 0.0657                              | 0.0349 | 0.0014                               | 1598                                | 198 | 417                                 | 44 | 221 | 9  | 38            |
| 60        | 855  | 1696 | 0.50 | 0.1044                               | 0.0057                              | 0.3230 | 0.0146                              | 0.0210 | 0.0006                               | 1706                                | 94  | 284                                 | 11 | 134 | 4  | 28            |
| 30        | 179  | 309  | 0.58 | 0.1178                               | 0.0095                              | 0.3466 | 0.0303                              | 0.0209 | 0.0008                               | 1924                                | 145 | 302                                 | 23 | 133 | 5  | 22            |
| 31        | 47   | 93   | 0.50 | 0.1296                               | 0.0131                              | 0.4501 | 0.0426                              | 0.0260 | 0.0011                               | 2094                                | 179 | 377                                 | 30 | 165 | 7  | 21            |
| 40        | 72   | 82   | 0.88 | 0.2390                               | 0.0283                              | 1.2894 | 0.2000                              | 0.0361 | 0.0018                               | 3113                                | 190 | 841                                 | 89 | 228 | 11 | 15            |
| 68        | 76   | 108  | 0.70 | 0.2295                               | 0.0241                              | 1.0554 | 0.1372                              | 0.0317 | 0.0017                               | 3050                                | 170 | 732                                 | 68 | 201 | 10 | 14            |
| 38        | 1625 | 3365 | 0.48 | 0.1374                               | 0.0059                              | 0.3713 | 0.0153                              | 0.0194 | 0.0006                               | 2195                                | 75  | 321                                 | 11 | 124 | 4  | 11            |
| HL11 Kich |      |      |      |                                      |                                     |        |                                     |        |                                      |                                     |     |                                     |    |     |    |               |
| 11        | 64   | 96   | 0.67 | 0.0617                               | 0.0133                              | 0.1227 | 0.0286                              | 0.0169 | 0.0015                               | 663                                 | 396 | 118                                 | 26 | 108 | 10 | 91            |

| Sp<br>ot | Th      | U       | Th/<br>U | <sup>207</sup> Pb/ <sup>206</sup> Pb | Isotopic Ratios                     |                                     |                                     |                                      |                                     | Isotopic Ages (Ma)                  |        |        |                               |    | Conc |
|----------|---------|---------|----------|--------------------------------------|-------------------------------------|-------------------------------------|-------------------------------------|--------------------------------------|-------------------------------------|-------------------------------------|--------|--------|-------------------------------|----|------|
|          | PP<br>m | PP<br>m |          |                                      | <sup>207</sup> Pb/ <sup>235</sup> U | <sup>207</sup> Pb/ <sup>238</sup> U | <sup>206</sup> Pb/ <sup>238</sup> U | <sup>207</sup> Pb/ <sup>206</sup> Pb | <sup>207</sup> Pb/ <sup>235</sup> U | <sup>206</sup> Pb/ <sup>238</sup> U | 1<br>σ | 1<br>σ | Conc<br>or-<br>Danc<br>e<br>% |    |      |
|          |         |         |          |                                      |                                     |                                     |                                     |                                      |                                     |                                     |        |        |                               |    |      |
|          |         |         |          |                                      |                                     |                                     |                                     |                                      |                                     |                                     |        |        |                               |    |      |
| 6        | 39<br>4 | 62<br>1 | 0.63     | 0.0518                               | 0.00<br>51                          | 0.1317<br>42                        | 0.0183                              | 0.00<br>08                           | 276                                 | 18<br>8                             | 126    | 13     | 117                           | 5  | 92   |
| 12       | 57      | 80      | 0.71     | 0.0527                               | 0.01<br>97                          | 0.1355<br>20                        | 0.0186                              | 0.00<br>17                           | 316                                 | 56<br>7                             | 129    | 47     | 119                           | 11 | 91   |
| 15       | 10<br>7 | 19<br>2 | 0.56     | 0.0545                               | 0.00<br>77                          | 0.1288<br>96                        | 0.0186                              | 0.00<br>11                           | 390                                 | 26<br>3                             | 123    | 18     | 119                           | 7  | 96   |
| 16       | 14<br>6 | 23<br>7 | 0.62     | 0.0573                               | 0.01<br>42                          | 0.1357<br>49                        | 0.0187                              | 0.00<br>13                           | 504                                 | 43<br>1                             | 129    | 31     | 119                           | 8  | 92   |
| 18       | 43      | 82      | 0.52     | 0.0502                               | 0.01<br>60                          | 0.1172<br>87                        | 0.0189                              | 0.00<br>16                           | 203                                 | 47<br>1                             | 112    | 35     | 121                           | 10 | 93   |
| 19       | 22<br>0 | 41<br>1 | 0.54     | 0.0499                               | 0.00<br>60                          | 0.1287<br>65                        | 0.0189                              | 0.00<br>08                           | 188                                 | 22<br>3                             | 123    | 15     | 121                           | 5  | 98   |
| 23       | 23<br>5 | 49<br>3 | 0.48     | 0.0536                               | 0.00<br>62                          | 0.1393<br>74                        | 0.0193                              | 0.00<br>09                           | 354                                 | 22<br>2                             | 132    | 16     | 123                           | 6  | 92   |
| 26       | 12<br>3 | 16<br>2 | 0.76     | 0.0455                               | 0.01<br>05                          | 0.1136<br>76                        | 0.0186                              | 0.00<br>14                           | -26                                 | 32<br>9                             | 109    | 25     | 119                           | 9  | 91   |
| 30       | 97      | 12<br>0 | 0.81     | 0.0557                               | 0.02<br>19                          | 0.1349<br>48                        | 0.0197                              | 0.00<br>21                           | 442                                 | 61<br>7                             | 129    | 49     | 126                           | 13 | 98   |
| 34       | 27      | 66      | 0.40     | 0.0698                               | 0.01<br>60                          | 0.1344<br>36                        | 0.0190                              | 0.00<br>19                           | 922                                 | 42<br>1                             | 128    | 30     | 121                           | 12 | 94   |
| 37       | 28<br>5 | 20<br>1 | 1.41     | 0.0556                               | 0.00<br>82                          | 0.1448<br>29                        | 0.0201                              | 0.00<br>11                           | 435                                 | 27<br>5                             | 137    | 20     | 129                           | 7  | 93   |
| 39       | 10<br>1 | 17<br>7 | 0.57     | 0.0538                               | 0.00<br>91                          | 0.1304<br>47                        | 0.0178                              | 0.00<br>15                           | 364                                 | 31<br>5                             | 124    | 22     | 114                           | 10 | 90   |
| 40       | 50      | 94      | 0.53     | 0.0522                               | 0.01<br>64                          | 0.1378<br>67                        | 0.0192                              | 0.00<br>25                           | 295                                 | 48<br>9                             | 131    | 42     | 123                           | 16 | 93   |
| 42       | 71<br>7 | 53<br>8 | 1.33     | 0.0544                               | 0.00<br>95                          | 0.1399<br>59                        | 0.0189                              | 0.00<br>12                           | 386                                 | 31<br>7                             | 133    | 23     | 121                           | 7  | 90   |
| 44       | 18<br>3 | 24<br>3 | 0.75     | 0.0491                               | 0.00<br>76                          | 0.1176<br>94                        | 0.0181                              | 0.00<br>10                           | 153                                 | 27<br>1                             | 113    | 18     | 116                           | 6  | 97   |
| 49       | 10<br>7 | 16<br>4 | 0.65     | 0.0565                               | 0.00<br>71                          | 0.1467<br>07                        | 0.0205                              | 0.00<br>13                           | 471                                 | 24<br>1                             | 139    | 18     | 130                           | 8  | 93   |
| 50       | 89      | 11<br>3 | 0.79     | 0.0544                               | 0.01<br>02                          | 0.1275<br>57                        | 0.0180                              | 0.00<br>13                           | 387                                 | 33<br>6                             | 122    | 23     | 115                           | 8  | 93   |
| 52       | 15<br>0 | 25<br>5 | 0.59     | 0.0469                               | 0.00<br>72                          | 0.1173<br>89                        | 0.0189                              | 0.00<br>10                           | 43                                  | 25<br>7                             | 113    | 17     | 121                           | 6  | 92   |

| Sp<br>ot | Th      | U       | Isotopic Ratios |                                      |                                     |        |                                     |        |                                      | Isotopic Ages (Ma)                  |         |                                     |    |        |        | Conc |
|----------|---------|---------|-----------------|--------------------------------------|-------------------------------------|--------|-------------------------------------|--------|--------------------------------------|-------------------------------------|---------|-------------------------------------|----|--------|--------|------|
|          | PP<br>m | PP<br>m | Th/<br>U        | <sup>207</sup> Pb/ <sup>206</sup> Pb | <sup>207</sup> Pb/ <sup>235</sup> U |        | <sup>206</sup> Pb/ <sup>238</sup> U |        | <sup>207</sup> Pb/ <sup>206</sup> Pb | <sup>207</sup> Pb/ <sup>235</sup> U |         | <sup>206</sup> Pb/ <sup>238</sup> U |    | 1<br>σ | 1<br>σ |      |
|          |         |         |                 |                                      | 1σ                                  | 1σ     | 1σ                                  | 1σ     |                                      | 1σ                                  | 1σ      |                                     |    |        |        |      |
|          |         |         |                 |                                      |                                     |        |                                     |        |                                      |                                     |         |                                     |    |        |        |      |
| 53       | 10<br>8 | 25<br>9 | 0.42            | 0.0543                               | 0.00<br>82                          | 0.1341 | 0.02<br>19                          | 0.0189 | 0.00<br>12                           | 381                                 | 28<br>1 | 128                                 | 20 | 121    | 8      | 94   |
| 55       | 19<br>6 | 24<br>5 | 0.80            | 0.0515                               | 0.00<br>84                          | 0.1280 | 0.02<br>22                          | 0.0190 | 0.00<br>11                           | 263                                 | 29<br>2 | 122                                 | 20 | 122    | 7      | 99   |
| 56       | 58      | 61      | 0.96            | 0.0628                               | 0.02<br>03                          | 0.1520 | 0.05<br>09                          | 0.0204 | 0.00<br>18                           | 702                                 | 56<br>4 | 144                                 | 45 | 130    | 11     | 90   |
| 60       | 56      | 12<br>3 | 0.46            | 0.0561                               | 0.00<br>94                          | 0.1332 | 0.02<br>41                          | 0.0192 | 0.00<br>13                           | 455                                 | 31<br>3 | 127                                 | 22 | 123    | 8      | 96   |
| 70       | 28<br>5 | 42<br>0 | 0.68            | 0.0484                               | 0.00<br>56                          | 0.1211 | 0.01<br>53                          | 0.0187 | 0.00<br>10                           | 117                                 | 21<br>1 | 116                                 | 14 | 119    | 6      | 97   |
| 72       | 21<br>8 | 38<br>3 | 0.57            | 0.0465                               | 0.00<br>56                          | 0.1186 | 0.01<br>54                          | 0.0185 | 0.00<br>09                           | 22                                  | 21<br>1 | 114                                 | 14 | 118    | 5      | 96   |
| 80       | 74      | 12<br>5 | 0.59            | 0.0690                               | 0.02<br>60                          | 0.1268 | 0.05<br>06                          | 0.0173 | 0.00<br>22                           | 897                                 | 66<br>6 | 121                                 | 46 | 110    | 14     | 90   |
| 85       | 17<br>7 | 35<br>9 | 0.49            | 0.0539                               | 0.00<br>60                          | 0.1397 | 0.01<br>84                          | 0.0192 | 0.00<br>14                           | 367                                 | 21<br>3 | 133                                 | 16 | 122    | 9      | 91   |
| 96       | 50      | 82      | 0.61            | 0.0672                               | 0.01<br>62                          | 0.1291 | 0.03<br>31                          | 0.0179 | 0.00<br>16                           | 843                                 | 44<br>0 | 123                                 | 30 | 114    | 10     | 92   |
| 98       | 27<br>6 | 32<br>6 | 0.85            | 0.0534                               | 0.00<br>95                          | 0.1393 | 0.02<br>61                          | 0.0195 | 0.00<br>12                           | 346                                 | 31<br>8 | 132                                 | 23 | 125    | 7      | 94   |
| 2        | 10<br>5 | 13<br>6 | 0.77            | 0.0542                               | 0.01<br>21                          | 0.1670 | 0.03<br>97                          | 0.0229 | 0.00<br>19                           | 378                                 | 38<br>5 | 157                                 | 35 | 146    | 12     | 92   |
| 9        | 48      | 69      | 0.70            | 0.0634                               | 0.01<br>98                          | 0.1705 | 0.05<br>56                          | 0.0229 | 0.00<br>21                           | 722                                 | 54<br>2 | 160                                 | 48 | 146    | 13     | 90   |
| 58       | 21<br>3 | 26<br>4 | 0.81            | 0.0563                               | 0.00<br>60                          | 0.1687 | 0.01<br>99                          | 0.0226 | 0.00<br>11                           | 462                                 | 20<br>4 | 158                                 | 17 | 144    | 7      | 90   |
| 32       | 25      | 66      | 0.37            | 0.0569                               | 0.01<br>18                          | 0.1854 | 0.04<br>12                          | 0.0254 | 0.00<br>20                           | 488                                 | 37<br>3 | 173                                 | 35 | 162    | 13     | 93   |
| 51       | 55      | 53      | 1.05            | 0.0610                               | 0.02<br>05                          | 0.1888 | 0.06<br>63                          | 0.0252 | 0.00<br>25                           | 639                                 | 58<br>1 | 176                                 | 57 | 160    | 16     | 90   |
| 77       | 17<br>7 | 33<br>2 | 0.53            | 0.0539                               | 0.00<br>79                          | 0.1719 | 0.02<br>66                          | 0.0239 | 0.00<br>12                           | 366                                 | 27<br>3 | 161                                 | 23 | 152    | 8      | 94   |
| 5        | 59      | 86      | 0.68            | 0.0596                               | 0.00<br>87                          | 0.2244 | 0.03<br>58                          | 0.0295 | 0.00<br>19                           | 590                                 | 29<br>2 | 206                                 | 30 | 188    | 12     | 90   |
| 7        | 70<br>4 | 48<br>1 | 1.46            | 0.0497                               | 0.00<br>46                          | 0.1963 | 0.02<br>01                          | 0.0285 | 0.00<br>12                           | 179                                 | 18<br>6 | 182                                 | 17 | 181    | 8      | 99   |

| Spot | Th/U |     | Isotopic Ratios |                                      |                                     |        |                                     |        |                                      | Isotopic Ages (Ma)                  |     |                                     |    |     |    | Concordance % |
|------|------|-----|-----------------|--------------------------------------|-------------------------------------|--------|-------------------------------------|--------|--------------------------------------|-------------------------------------|-----|-------------------------------------|----|-----|----|---------------|
|      | PPm  | PPm | Th/U            | <sup>207</sup> Pb/ <sup>206</sup> Pb | <sup>207</sup> Pb/ <sup>235</sup> U |        | <sup>206</sup> Pb/ <sup>238</sup> U |        | <sup>207</sup> Pb/ <sup>206</sup> Pb | <sup>207</sup> Pb/ <sup>235</sup> U |     | <sup>206</sup> Pb/ <sup>238</sup> U |    |     |    |               |
|      |      |     |                 |                                      | 1σ                                  | 1σ     | 1σ                                  | 1σ     |                                      | 1σ                                  | 1σ  |                                     |    |     |    |               |
|      |      |     |                 |                                      |                                     |        |                                     |        |                                      |                                     |     |                                     |    |     |    |               |
| 8    | 226  | 390 | 0.58            | 0.0509                               | 0.0047                              | 0.2163 | 0.0217                              | 0.0305 | 0.0012                               | 237                                 | 192 | 199                                 | 18 | 194 | 8  | 97            |
| 10   | 64   | 159 | 0.40            | 0.0541                               | 0.0065                              | 0.2179 | 0.0286                              | 0.0297 | 0.0015                               | 376                                 | 245 | 200                                 | 24 | 189 | 9  | 94            |
| 14   | 209  | 266 | 0.78            | 0.0555                               | 0.0056                              | 0.2112 | 0.0236                              | 0.0277 | 0.0013                               | 431                                 | 211 | 195                                 | 20 | 176 | 8  | 90            |
| 17   | 262  | 524 | 0.50            | 0.0484                               | 0.0046                              | 0.2017 | 0.0207                              | 0.0301 | 0.0012                               | 120                                 | 187 | 187                                 | 17 | 191 | 7  | 97            |
| 20   | 86   | 211 | 0.41            | 0.0525                               | 0.0071                              | 0.2179 | 0.0314                              | 0.0304 | 0.0015                               | 306                                 | 264 | 200                                 | 26 | 193 | 9  | 96            |
| 22   | 229  | 491 | 0.47            | 0.0549                               | 0.0061                              | 0.2000 | 0.0241                              | 0.0262 | 0.0012                               | 408                                 | 231 | 185                                 | 20 | 167 | 8  | 89            |
| 28   | 139  | 271 | 0.51            | 0.0540                               | 0.0083                              | 0.2093 | 0.0337                              | 0.0285 | 0.0013                               | 370                                 | 300 | 193                                 | 28 | 181 | 8  | 93            |
| 29   | 12   | 297 | 0.42            | 0.0556                               | 0.0071                              | 0.2339 | 0.0318                              | 0.0305 | 0.0014                               | 436                                 | 258 | 213                                 | 26 | 194 | 9  | 90            |
| 33   | 43   | 61  | 0.70            | 0.0566                               | 0.0107                              | 0.1943 | 0.0396                              | 0.0274 | 0.0021                               | 476                                 | 345 | 180                                 | 34 | 174 | 13 | 96            |
| 35   | 237  | 422 | 0.56            | 0.0451                               | 0.0041                              | 0.1712 | 0.0170                              | 0.0275 | 0.0011                               | -14                                 | 162 | 160                                 | 15 | 175 | 7  | 91            |
| 36   | 84   | 98  | 0.85            | 0.0566                               | 0.0073                              | 0.2143 | 0.0302                              | 0.0290 | 0.0017                               | 476                                 | 259 | 197                                 | 25 | 184 | 11 | 93            |
| 38   | 41   | 47  | 0.87            | 0.0919                               | 0.0272                              | 0.2270 | 0.0731                              | 0.0299 | 0.0038                               | 1465                                | 575 | 208                                 | 61 | 190 | 24 | 91            |
| 41   | 214  | 236 | 0.91            | 0.0499                               | 0.0057                              | 0.1941 | 0.0239                              | 0.0288 | 0.0013                               | 190                                 | 224 | 180                                 | 20 | 183 | 8  | 98            |
| 45   | 35   | 47  | 0.75            | 0.0698                               | 0.0285                              | 0.2355 | 0.0994                              | 0.0308 | 0.0032                               | 923                                 | 804 | 215                                 | 82 | 195 | 20 | 90            |
| 46   | 440  | 388 | 1.14            | 0.0480                               | 0.0050                              | 0.1837 | 0.0209                              | 0.0278 | 0.0013                               | 101                                 | 196 | 171                                 | 18 | 177 | 8  | 96            |
| 57   | 188  | 263 | 0.71            | 0.0548                               | 0.0064                              | 0.2164 | 0.0270                              | 0.0288 | 0.0013                               | 403                                 | 244 | 199                                 | 23 | 183 | 8  | 91            |
| 61   | 202  | 393 | 0.51            | 0.0468                               | 0.0046                              | 0.1834 | 0.0198                              | 0.0289 | 0.0012                               | 37                                  | 185 | 171                                 | 17 | 183 | 8  | 92            |
| 62   | 198  | 316 | 0.63            | 0.0508                               | 0.0054                              | 0.2073 | 0.0241                              | 0.0305 | 0.0014                               | 230                                 | 216 | 191                                 | 20 | 194 | 9  | 98            |

| Sp<br>ot | Th       | U        | Isotopic Ratios |                                      |                                     |        |                                     |        |                                      | Isotopic Ages (Ma)                  |         |                                     |    |      |    | Conc |
|----------|----------|----------|-----------------|--------------------------------------|-------------------------------------|--------|-------------------------------------|--------|--------------------------------------|-------------------------------------|---------|-------------------------------------|----|------|----|------|
|          | PP<br>m  | PP<br>m  | Th/<br>U        | <sup>207</sup> Pb/ <sup>206</sup> Pb | <sup>207</sup> Pb/ <sup>235</sup> U |        | <sup>206</sup> Pb/ <sup>238</sup> U |        | <sup>207</sup> Pb/ <sup>206</sup> Pb | <sup>207</sup> Pb/ <sup>235</sup> U |         | <sup>206</sup> Pb/ <sup>238</sup> U |    | Danc |    |      |
|          |          |          |                 |                                      | 1σ                                  | 1σ     | 1σ                                  | 1σ     |                                      | 1σ                                  | 1σ      |                                     |    |      |    |      |
|          |          |          |                 |                                      |                                     |        |                                     |        |                                      |                                     |         | 1σ                                  | 1σ |      | 1σ | 1σ   |
| 64       | 20<br>6  | 25<br>2  | 0.82            | 0.0537                               | 0.00<br>60                          | 0.2090 | 0.02<br>56                          | 0.0288 | 0.00<br>15                           | 357                                 | 23<br>3 | 193                                 | 22 | 183  | 9  | 94   |
| 65       | 10<br>9  | 26<br>8  | 0.41            | 0.0497                               | 0.00<br>56                          | 0.2037 | 0.02<br>45                          | 0.0302 | 0.00<br>13                           | 182                                 | 21<br>9 | 188                                 | 21 | 192  | 8  | 98   |
| 69       | 18<br>6  | 21<br>8  | 0.85            | 0.0542                               | 0.00<br>92                          | 0.2084 | 0.03<br>71                          | 0.0277 | 0.00<br>15                           | 380                                 | 31<br>8 | 192                                 | 31 | 176  | 9  | 91   |
| 71       | 89<br>7  | 14<br>7  | 0.60            | 0.0524                               | 0.00<br>75                          | 0.1917 | 0.03<br>00                          | 0.0284 | 0.00<br>18                           | 302                                 | 27<br>8 | 178                                 | 26 | 181  | 11 | 98   |
| 75       | 11<br>8  | 18<br>5  | 0.64            | 0.0550                               | 0.00<br>88                          | 0.2037 | 0.03<br>49                          | 0.0274 | 0.00<br>17                           | 411                                 | 29<br>9 | 188                                 | 29 | 174  | 11 | 92   |
| 79       | 51<br>8  | 56<br>6  | 0.92            | 0.0524                               | 0.00<br>46                          | 0.2024 | 0.01<br>95                          | 0.0280 | 0.00<br>11                           | 302                                 | 18<br>3 | 187                                 | 16 | 178  | 7  | 95   |
| 82       | 37<br>2  | 91<br>2  | 0.41            | 0.0501                               | 0.00<br>37                          | 0.1926 | 0.01<br>58                          | 0.0279 | 0.00<br>10                           | 200                                 | 15<br>3 | 179                                 | 13 | 178  | 6  | 99   |
| 83       | 82<br>0  | 21<br>0  | 0.39            | 0.0537                               | 0.00<br>94                          | 0.2216 | 0.04<br>12                          | 0.0298 | 0.00<br>19                           | 358                                 | 34<br>0 | 203                                 | 34 | 190  | 12 | 93   |
| 84       | 11<br>9  | 22<br>4  | 0.53            | 0.0552                               | 0.01<br>07                          | 0.1993 | 0.04<br>11                          | 0.0271 | 0.00<br>19                           | 422                                 | 34<br>8 | 185                                 | 35 | 172  | 12 | 93   |
| 87       | 26<br>3  | 35<br>1  | 0.75            | 0.0522                               | 0.00<br>58                          | 0.1993 | 0.02<br>37                          | 0.0284 | 0.00<br>12                           | 296                                 | 22<br>5 | 185                                 | 20 | 181  | 8  | 97   |
| 92       | 40       | 83       | 0.48            | 0.0584                               | 0.01<br>00                          | 0.2132 | 0.04<br>07                          | 0.0296 | 0.00<br>25                           | 545                                 | 33<br>4 | 196                                 | 34 | 188  | 16 | 95   |
| 94       | 20<br>4  | 25<br>6  | 0.79            | 0.0515                               | 0.00<br>65                          | 0.2063 | 0.02<br>79                          | 0.0292 | 0.00<br>14                           | 265                                 | 24<br>6 | 190                                 | 23 | 185  | 8  | 97   |
| 25       | 24<br>0  | 35<br>0  | 0.68            | 0.0591                               | 0.00<br>72                          | 0.2680 | 0.03<br>68                          | 0.0328 | 0.00<br>21                           | 572                                 | 24<br>9 | 241                                 | 29 | 208  | 13 | 85   |
| 54       | 20<br>8  | 31<br>5  | 0.66            | 0.0490                               | 0.00<br>59                          | 0.2170 | 0.02<br>80                          | 0.0320 | 0.00<br>15                           | 149                                 | 23<br>0 | 199                                 | 23 | 203  | 10 | 98   |
| 67       | 71<br>7  | 11<br>7  | 0.61            | 0.0589                               | 0.00<br>87                          | 0.2443 | 0.04<br>00                          | 0.0332 | 0.00<br>23                           | 564                                 | 29<br>9 | 222                                 | 33 | 211  | 14 | 94   |
| 68       | 12<br>1  | 17<br>6  | 0.68            | 0.0506                               | 0.00<br>74                          | 0.2219 | 0.03<br>40                          | 0.0320 | 0.00<br>16                           | 222                                 | 28<br>1 | 203                                 | 28 | 203  | 10 | 99   |
| 78       | 12<br>8  | 14<br>3  | 0.89            | 0.0631                               | 0.01<br>18                          | 0.2568 | 0.05<br>43                          | 0.0333 | 0.00<br>33                           | 712                                 | 36<br>3 | 232                                 | 44 | 211  | 21 | 90   |
| 3        | 11<br>39 | 10<br>25 | 1.11            | 0.0564                               | 0.00<br>48                          | 0.2956 | 0.02<br>79                          | 0.0376 | 0.00<br>15                           | 467                                 | 17<br>6 | 263                                 | 22 | 238  | 9  | 90   |



| Sp<br>ot | Th      | U       | Isotopic Ratios |                                      |                                     |        |                                     |        |                                      | Isotopic Ages (Ma)                  |     |                                     |     |      |    | Conc |
|----------|---------|---------|-----------------|--------------------------------------|-------------------------------------|--------|-------------------------------------|--------|--------------------------------------|-------------------------------------|-----|-------------------------------------|-----|------|----|------|
|          | PP<br>m | PP<br>m | Th/<br>U        | <sup>207</sup> Pb/ <sup>206</sup> Pb | <sup>207</sup> Pb/ <sup>235</sup> U |        | <sup>206</sup> Pb/ <sup>238</sup> U |        | <sup>207</sup> Pb/ <sup>206</sup> Pb | <sup>207</sup> Pb/ <sup>235</sup> U |     | <sup>206</sup> Pb/ <sup>238</sup> U |     | Danc |    |      |
|          |         |         |                 |                                      | 1σ                                  | 1σ     | 1σ                                  | 1σ     |                                      | 1σ                                  | 1σ  |                                     |     |      |    |      |
|          |         |         |                 |                                      |                                     |        |                                     |        |                                      |                                     |     | 1σ                                  | 1σ  |      | 1σ | 1σ   |
| 100      | 90      | 116     | 0.77            | 0.0565                               | 0.0072                              | 0.2870 | 0.0400                              | 0.0380 | 0.0022                               | 474                                 | 256 | 32                                  | 241 | 14   | 93 |      |
| 24       | 98      | 124     | 0.80            | 0.0602                               | 0.0088                              | 0.2754 | 0.0448                              | 0.0364 | 0.0026                               | 611                                 | 247 | 36                                  | 231 | 16   | 93 |      |
| 27       | 104     | 160     | 0.65            | 0.0564                               | 0.0069                              | 0.2848 | 0.0374                              | 0.0378 | 0.0018                               | 466                                 | 254 | 30                                  | 239 | 11   | 93 |      |
| 31       | 382     | 271     | 1.41            | 0.0505                               | 0.0048                              | 0.2655 | 0.0276                              | 0.0383 | 0.0017                               | 217                                 | 239 | 22                                  | 242 | 10   | 98 |      |
| 48       | 643     | 213     | 0.30            | 0.0506                               | 0.0057                              | 0.2919 | 0.0357                              | 0.0419 | 0.0019                               | 223                                 | 260 | 28                                  | 264 | 12   | 98 |      |
| 66       | 225     | 478     | 0.47            | 0.0478                               | 0.0040                              | 0.2448 | 0.0226                              | 0.0372 | 0.0015                               | 88                                  | 222 | 18                                  | 236 | 9    | 94 |      |
| 73       | 108     | 114     | 0.95            | 0.0570                               | 0.0067                              | 0.3113 | 0.0400                              | 0.0411 | 0.0022                               | 493                                 | 275 | 31                                  | 260 | 14   | 94 |      |
| 76       | 9017    | 8       | 0.51            | 0.0573                               | 0.0092                              | 0.3435 | 0.0579                              | 0.0440 | 0.0023                               | 502                                 | 300 | 44                                  | 278 | 14   | 92 |      |
| 81       | 53      | 68      | 0.78            | 0.0627                               | 0.0127                              | 0.3144 | 0.0669                              | 0.0405 | 0.0026                               | 698                                 | 278 | 52                                  | 256 | 16   | 91 |      |
| 88       | 45      | 78      | 0.57            | 0.0514                               | 0.0096                              | 0.2753 | 0.0552                              | 0.0432 | 0.0031                               | 258                                 | 247 | 44                                  | 273 | 19   | 90 |      |
| 89       | 482     | 356     | 1.35            | 0.0550                               | 0.0048                              | 0.3065 | 0.0297                              | 0.0409 | 0.0017                               | 413                                 | 271 | 23                                  | 259 | 10   | 95 |      |
| 91       | 987     | 88      | 1.11            | 0.0567                               | 0.0043                              | 0.3046 | 0.0258                              | 0.0389 | 0.0014                               | 478                                 | 270 | 20                                  | 246 | 9    | 90 |      |
| 93       | 80      | 102     | 0.79            | 0.0533                               | 0.0066                              | 0.2655 | 0.0368                              | 0.0390 | 0.0024                               | 340                                 | 239 | 29                                  | 247 | 15   | 96 |      |
| 95       | 87      | 145     | 0.60            | 0.0599                               | 0.0106                              | 0.3078 | 0.0576                              | 0.0391 | 0.0023                               | 598                                 | 272 | 45                                  | 247 | 14   | 90 |      |
| 97       | 76      | 135     | 0.56            | 0.0576                               | 0.0073                              | 0.3169 | 0.0451                              | 0.0421 | 0.0028                               | 513                                 | 279 | 35                                  | 266 | 17   | 94 |      |
| 86       | 364     | 691     | 0.53            | 0.0535                               | 0.0038                              | 0.3495 | 0.0281                              | 0.0473 | 0.0018                               | 352                                 | 304 | 21                                  | 298 | 11   | 97 |      |
| 63       | 114     | 210     | 0.54            | 0.0508                               | 0.0047                              | 0.3576 | 0.0364                              | 0.0516 | 0.0022                               | 231                                 | 310 | 27                                  | 324 | 14   | 95 |      |
| 1        | 49      | 101     | 0.49            | 0.0611                               | 0.0095                              | 0.4392 | 0.0734                              | 0.0545 | 0.0032                               | 642                                 | 370 | 52                                  | 342 | 20   | 92 |      |

| Sp<br>ot | Th  |     | U        | Isotopic Ratios                         |                                     |                   |                                     |                   |                                         | Isotopic Ages (Ma)                  |                   |                                     |     |                   |                   | Conc<br>or-<br>Danc<br>e<br>% |
|----------|-----|-----|----------|-----------------------------------------|-------------------------------------|-------------------|-------------------------------------|-------------------|-----------------------------------------|-------------------------------------|-------------------|-------------------------------------|-----|-------------------|-------------------|-------------------------------|
|          | ppm | ppm | Th/<br>U | <sup>207</sup> Pb/<br><sup>206</sup> Pb | <sup>207</sup> Pb/ <sup>235</sup> U |                   | <sup>206</sup> Pb/ <sup>238</sup> U |                   | <sup>207</sup> Pb/<br><sup>206</sup> Pb | <sup>207</sup> Pb/ <sup>235</sup> U |                   | <sup>206</sup> Pb/ <sup>238</sup> U |     | <sup>1</sup><br>σ | <sup>1</sup><br>σ |                               |
|          |     |     |          |                                         | <sup>1</sup><br>σ                   | <sup>1</sup><br>σ | <sup>1</sup><br>σ                   | <sup>1</sup><br>σ |                                         | <sup>1</sup><br>σ                   | <sup>1</sup><br>σ |                                     |     |                   |                   |                               |
|          |     |     |          |                                         |                                     |                   |                                     |                   |                                         |                                     |                   |                                     |     |                   |                   |                               |
| 4        | 58  | 115 | 0.50     | 0.0516                                  | 0.0064                              | 0.3997            | 0.0532                              | 0.0564            | 0.0028                                  | 266                                 | 244               | 341                                 | 39  | 354               | 17                | 96                            |
| 99       | 267 | 390 | 0.69     | 0.0605                                  | 0.0040                              | 0.5104            | 0.0386                              | 0.0612            | 0.0022                                  | 622                                 | 133               | 419                                 | 26  | 383               | 14                | 91                            |
| 47       | 64  | 49  | 1.30     | 0.1704                                  | 0.0098                              | 11.2352           | 0.7883                              | 0.4726            | 0.0188                                  | 2561                                | 90                | 2543                                | 65  | 2495              | 82                | 98                            |
| 43       | 30  | 54  | 0.55     | 0.0778                                  | 0.0179                              | 0.3949            | 0.0979                              | 0.0458            | 0.0043                                  | 1143                                | 445               | 338                                 | 71  | 289               | 26                | 84                            |
| 74       | 97  | 138 | 0.70     | 0.0743                                  | 0.0262                              | 0.2357            | 0.0878                              | 0.0225            | 0.0027                                  | 1050                                | 706               | 215                                 | 72  | 143               | 17                | 60                            |
| 90       | 64  | 69  | 0.92     | 0.0537                                  | 0.0154                              | 0.2785            | 0.0906                              | 0.0376            | 0.0027                                  | 360                                 | 482               | 249                                 | 72  | 238               | 17                | 50                            |
| 59       | 51  | 72  | 0.71     | 0.2741                                  | 0.1019                              | 1.4721            | 0.6283                              | 0.0302            | 0.0063                                  | 3329                                | 788               | 919                                 | 258 | 192               | 40                | 31                            |
| 21       | 149 | 442 | 0.34     | 0.0670                                  | 0.0179                              | 0.2215            | 0.0665                              | 0.0240            | 0.0015                                  | 838                                 | 513               | 203                                 | 55  | 153               | 9                 | 3                             |
| 13       | 267 | 382 | 0.70     | 0.1454                                  | 0.0102                              | 0.6554            | 0.0542                              | 0.0325            | 0.0014                                  | 2293                                | 112               | 512                                 | 33  | 206               | 9                 | 14                            |
| HL15 Kim |     |     |          |                                         |                                     |                   |                                     |                   |                                         |                                     |                   |                                     |     |                   |                   |                               |
| 31       | 299 | 272 | 1.10     |                                         | 0.0131                              |                   | 0.0313                              |                   | 0.0015                                  |                                     | 466               |                                     |     |                   |                   | 93                            |
| 55       | 185 | 469 | 0.39     |                                         | 0.0073                              |                   | 0.0189                              |                   | 0.0008                                  |                                     | 389               |                                     |     |                   |                   | 90                            |
| 29       | 388 | 192 | 2.02     |                                         | 0.0126                              |                   | 0.0336                              |                   | 0.0015                                  |                                     | 44                |                                     |     |                   |                   | 90                            |
| 99       | 189 | 317 | 0.60     |                                         | 0.0077                              |                   | 0.0211                              |                   | 0.0011                                  |                                     | 32                |                                     |     |                   |                   | 90                            |
| 79       | 391 | 469 | 0.83     |                                         | 0.0064                              |                   | 0.0175                              |                   | 0.0009                                  |                                     | 26                |                                     |     |                   |                   | 90                            |
| 71       | 112 | 200 | 0.56     |                                         | 0.0145                              |                   | 0.0403                              |                   | 0.0013                                  |                                     | 50                |                                     |     |                   |                   | 95                            |
| 9        | 259 | 395 | 0.66     |                                         | 0.0060                              |                   | 0.0139                              |                   | 0.0009                                  |                                     | 26                |                                     |     |                   |                   | 96                            |
| 68       | 128 | 432 | 0.30     |                                         | 0.0081                              |                   | 0.1404                              |                   | 0.0195                                  |                                     | 33                |                                     |     |                   |                   | 93                            |
| 98       | 121 | 242 | 0.50     |                                         | 0.0067                              |                   | 0.1338                              |                   | 0.0196                                  |                                     | 29                |                                     |     |                   |                   | 98                            |

| Sp<br>ot | Th      | U       | Th/<br>U | Isotopic Ratios                      |                                     |        |                                     |        |                                      | Isotopic Ages (Ma) |                                     |     |                                     |     |        | Conc<br>or-<br>Danc<br>e<br>% |
|----------|---------|---------|----------|--------------------------------------|-------------------------------------|--------|-------------------------------------|--------|--------------------------------------|--------------------|-------------------------------------|-----|-------------------------------------|-----|--------|-------------------------------|
|          | PP<br>m | PP<br>m |          | <sup>207</sup> Pb/ <sup>206</sup> Pb | <sup>207</sup> Pb/ <sup>235</sup> U |        | <sup>206</sup> Pb/ <sup>238</sup> U |        | <sup>207</sup> Pb/ <sup>206</sup> Pb |                    | <sup>207</sup> Pb/ <sup>235</sup> U |     | <sup>206</sup> Pb/ <sup>238</sup> U |     | 1<br>σ |                               |
|          |         |         |          |                                      | 1σ                                  | 1σ     | 1σ                                  | 1σ     | 1σ                                   | 1σ                 | 1σ                                  | 1σ  |                                     |     |        |                               |
|          |         |         |          |                                      |                                     |        |                                     |        |                                      |                    |                                     |     |                                     |     |        |                               |
| 18       | 14<br>5 | 24<br>3 | 0.60     |                                      | 0.00<br>96                          |        | 0.02<br>66                          |        | 0.00<br>13                           |                    | 37<br>4                             |     |                                     |     | 93     |                               |
| 20       | 11      | 15      | 0.75     |                                      | 0.00                                |        | 0.01                                |        | 0.00                                 |                    | 22                                  |     |                                     |     | 90     |                               |
|          | 39      | 22      |          | 0.0547                               | 53                                  | 0.1457 | 57                                  | 0.0198 | 09                                   | 402                | 8                                   | 138 | 14                                  | 126 |        | 6                             |
| 37       | 16      | 25      | 0.64     |                                      | 0.00                                |        | 0.01                                |        | 0.00                                 |                    | 25                                  |     |                                     |     | 90     |                               |
|          | 4       | 5       |          | 0.0570                               | 62                                  | 0.1508 | 83                                  | 0.0203 | 11                                   | 492                | 2                                   | 143 | 16                                  | 129 |        | 7                             |
| 92       | 51      | 10      | 0.51     |                                      | 0.00                                |        | 0.01                                |        | 0.00                                 |                    | 25                                  |     |                                     |     | 90     |                               |
|          | 8       | 18      |          | 0.0533                               | 59                                  | 0.1531 | 90                                  | 0.0206 | 11                                   | 343                | 4                                   | 145 | 17                                  | 131 |        | 7                             |
| 39       | 36      | 41      | 0.88     |                                      | 0.01                                |        | 0.04                                |        | 0.00                                 |                    | 48                                  |     |                                     |     | 89     |                               |
|          | 9       | 9       |          | 0.0557                               | 38                                  | 0.1572 | 08                                  | 0.0209 | 16                                   | 440                | 7                                   | 148 | 36                                  | 133 |        | 10                            |
| 24       |         | 18      | 0.50     |                                      | 0.01                                |        | 0.04                                |        | 0.00                                 |                    | 52                                  |     |                                     |     | 90     |                               |
|          | 93      | 4       |          | 0.0575                               | 50                                  | 0.1556 | 25                                  | 0.0210 | 17                                   | 511                | 0                                   | 147 | 37                                  | 134 |        | 11                            |
| 61       |         | 11      | 0.77     |                                      | 0.01                                |        | 0.03                                |        | 0.00                                 |                    | 48                                  |     |                                     |     | 93     |                               |
|          | 90      | 6       |          | 0.0559                               | 34                                  | 0.1583 | 99                                  | 0.0220 | 17                                   | 449                | 1                                   | 149 | 35                                  | 140 |        | 11                            |
| 27       | 10      | 13      | 0.80     |                                      | 0.01                                |        | 0.03                                |        | 0.00                                 |                    | 40                                  |     |                                     |     | 96     |                               |
|          | 8       | 5       |          | 0.0540                               | 07                                  | 0.1533 | 21                                  | 0.0220 | 15                                   | 372                | 4                                   | 145 | 28                                  | 140 |        | 9                             |
| 63       |         | 10      | 0.43     |                                      | 0.02                                |        | 0.06                                |        | 0.00                                 |                    | 77                                  |     |                                     |     | 93     |                               |
|          | 44      | 3       |          | 0.0659                               | 40                                  | 0.1635 | 18                                  | 0.0227 | 22                                   | 802                | 8                                   | 154 | 54                                  | 145 |        | 14                            |
| 2        | 27      | 29      | 0.93     |                                      | 0.00                                |        | 0.02                                |        | 0.00                                 |                    | 27                                  |     |                                     |     | 95     |                               |
|          | 1       | 3       |          | 0.0520                               | 64                                  | 0.1636 | 17                                  | 0.0232 | 11                                   | 286                | 8                                   | 154 | 19                                  | 148 |        | 7                             |
| 77       | 38      | 90      | 0.42     |                                      | 0.00                                |        | 0.01                                |        | 0.00                                 |                    | 21                                  |     |                                     |     | 90     |                               |
|          | 1       | 2       |          | 0.0545                               | 50                                  | 0.1741 | 75                                  | 0.0232 | 09                                   | 393                | 5                                   | 163 | 15                                  | 148 |        | 6                             |
| 33       | 26      | 63      | 0.41     |                                      | 0.00                                |        | 0.03                                |        | 0.00                                 |                    | 36                                  |     |                                     |     | 90     |                               |
|          | 3       | 3       |          | 0.0559                               | 94                                  | 0.1835 | 27                                  | 0.0243 | 14                                   | 449                | 2                                   | 171 | 28                                  | 155 |        | 9                             |
| 50       | 15      | 25      | 0.60     |                                      | 0.00                                |        | 0.02                                |        | 0.00                                 |                    | 28                                  |     |                                     |     | 90     |                               |
|          | 2       | 2       |          | 0.0569                               | 72                                  | 0.1834 | 50                                  | 0.0245 | 13                                   | 489                | 7                                   | 171 | 21                                  | 156 |        | 8                             |
| 90       | 21      | 31      | 0.69     |                                      | 0.00                                |        | 0.03                                |        | 0.00                                 |                    | 33                                  |     |                                     |     | 85     |                               |
|          | 6       | 5       |          | 0.0568                               | 82                                  | 0.2040 | 16                                  | 0.0257 | 14                                   | 484                | 3                                   | 188 | 27                                  | 164 |        | 9                             |
| 48       | 13      | 19      | 0.69     |                                      | 0.00                                |        | 0.02                                |        | 0.00                                 |                    | 30                                  |     |                                     |     | 97     |                               |
|          | 4       | 5       |          | 0.0527                               | 70                                  | 0.1802 | 58                                  | 0.0259 | 14                                   | 316                | 2                                   | 168 | 22                                  | 165 |        | 8                             |
| 51       | 57      | 59      | 0.96     |                                      | 0.00                                |        | 0.02                                |        | 0.00                                 |                    | 23                                  |     |                                     |     | 91     |                               |
|          | 1       | 3       |          | 0.0550                               | 55                                  | 0.1979 | 14                                  | 0.0264 | 11                                   | 410                | 4                                   | 183 | 18                                  | 168 |        | 7                             |
| 82       | 27      | 52      | 0.52     |                                      | 0.00                                |        | 0.03                                |        | 0.00                                 |                    | 30                                  |     |                                     |     | 85     |                               |
|          | 5       | 7       |          | 0.0559                               | 74                                  | 0.2117 | 08                                  | 0.0265 | 16                                   | 447                | 4                                   | 195 | 26                                  | 168 |        | 10                            |
| 81       |         | 13      | 0.68     |                                      | 0.00                                |        | 0.02                                |        | 0.00                                 |                    | 28                                  |     |                                     |     | 97     |                               |
|          | 92      | 5       |          | 0.0516                               | 69                                  | 0.1826 | 65                                  | 0.0274 | 16                                   | 268                | 7                                   | 170 | 23                                  | 174 |        | 10                            |

| Sp<br>ot | Th      | U       | Isotopic Ratios |                                   |                                  |           |                                  |           |                                   |                                  | Isotopic Ages (Ma) |                                  |    |     |    | Conc<br>or-<br>Danc<br>e<br>% |
|----------|---------|---------|-----------------|-----------------------------------|----------------------------------|-----------|----------------------------------|-----------|-----------------------------------|----------------------------------|--------------------|----------------------------------|----|-----|----|-------------------------------|
|          | PP<br>m | PP<br>m | Th/<br>U        | $^{207}\text{Pb}/^{206}\text{Pb}$ | $^{207}\text{Pb}/^{235}\text{U}$ |           | $^{206}\text{Pb}/^{238}\text{U}$ |           | $^{207}\text{Pb}/^{206}\text{Pb}$ | $^{207}\text{Pb}/^{235}\text{U}$ |                    | $^{206}\text{Pb}/^{238}\text{U}$ |    |     |    |                               |
|          |         |         |                 | $1\sigma$                         | $1\sigma$                        | $1\sigma$ | $1\sigma$                        | $1\sigma$ | $1\sigma$                         | $1\sigma$                        |                    |                                  |    |     |    |                               |
|          |         |         |                 |                                   |                                  |           |                                  |           |                                   |                                  |                    |                                  |    |     |    |                               |
| 3        | 27      | 41      | 0.66            |                                   | 0.00                             |           | 0.02                             |           | 0.00                              |                                  | 26                 |                                  |    |     | 91 |                               |
|          | 5       | 9       |                 | 0.0545                            | 64                               | 0.2065    | 55                               | 0.0275    | 11                                | 392                              | 7                  | 191                              | 21 | 175 | 7  |                               |
| 72       | 28      | 51      | 0.55            |                                   | 0.00                             |           | 0.01                             |           | 0.00                              |                                  | 21                 |                                  |    |     | 95 |                               |
|          | 3       | 7       |                 | 0.0476                            | 47                               | 0.1796    | 92                               | 0.0276    | 12                                | 78                               | 4                  | 168                              | 17 | 175 |    | 7                             |
| 80       | 31      | 86      | 0.36            |                                   | 0.00                             |           | 0.02                             |           | 0.00                              |                                  | 22                 |                                  |    |     | 95 |                               |
|          | 3       | 8       |                 | 0.0513                            | 51                               | 0.1970    | 13                               | 0.0276    | 12                                | 256                              | 5                  | 183                              | 18 | 175 |    | 7                             |
| 26       | 96      | 12      | 0.79            |                                   | 0.00                             |           | 0.03                             |           | 0.00                              |                                  | 35                 |                                  |    |     | 90 |                               |
|          |         | 1       |                 | 0.0566                            | 89                               | 0.2112    | 62                               | 0.0278    | 20                                | 474                              | 2                  | 195                              | 30 | 177 |    | 12                            |
| 96       | 71      | 13      | 0.54            |                                   | 0.00                             |           | 0.01                             |           | 0.00                              |                                  | 17                 |                                  |    |     | 98 |                               |
|          | 8       | 19      |                 | 0.0482                            | 37                               | 0.1924    | 62                               | 0.0286    | 10                                | 107                              | 2                  | 179                              | 14 | 182 |    | 6                             |
| 64       | 15      | 26      | 0.59            |                                   | 0.00                             |           | 0.03                             |           | 0.00                              |                                  | 32                 |                                  |    |     | 92 |                               |
|          | 6       | 4       |                 | 0.0587                            | 83                               | 0.2142    | 25                               | 0.0288    | 16                                | 556                              | 3                  | 197                              | 27 | 183 |    | 10                            |
| 58       | 87      | 10      | 0.82            |                                   | 0.01                             |           | 0.05                             |           | 0.00                              |                                  | 47                 |                                  |    |     | 91 |                               |
|          |         | 7       |                 | 0.0579                            | 35                               | 0.2184    | 56                               | 0.0289    | 30                                | 524                              | 8                  | 201                              | 46 | 183 |    | 19                            |
| 70       | 20      | 44      | 0.47            |                                   | 0.00                             |           | 0.02                             |           | 0.00                              |                                  | 25                 |                                  |    |     | 93 |                               |
|          | 6       | 1       |                 | 0.0543                            | 60                               | 0.2139    | 55                               | 0.0290    | 13                                | 385                              | 3                  | 197                              | 21 | 184 |    | 8                             |
| 11       | 50      | 54      | 0.93            |                                   | 0.00                             |           | 0.02                             |           | 0.00                              |                                  | 22                 |                                  |    |     | 93 |                               |
|          | 5       | 3       |                 | 0.0530                            | 51                               | 0.2147    | 25                               | 0.0292    | 13                                | 330                              | 3                  | 197                              | 19 | 185 |    | 8                             |
| 36       | 36      | 49      | 0.73            |                                   | 0.00                             |           | 0.02                             |           | 0.00                              |                                  | 23                 |                                  |    |     | 96 |                               |
|          | 3       | 7       |                 | 0.0517                            | 52                               | 0.2128    | 34                               | 0.0297    | 13                                | 270                              | 1                  | 196                              | 20 | 189 |    | 8                             |
| 73       | 21      | 23      | 0.90            |                                   | 0.00                             |           | 0.03                             |           | 0.00                              |                                  | 31                 |                                  |    |     | 91 |                               |
|          | 3       | 7       |                 | 0.0549                            | 75                               | 0.2252    | 28                               | 0.0299    | 15                                | 409                              | 4                  | 206                              | 27 | 190 |    | 10                            |
| 4        | 12      | 30      | 0.43            |                                   | 0.00                             |           | 0.02                             |           | 0.00                              |                                  | 24                 |                                  |    |     | 92 |                               |
|          | 9       | 4       |                 | 0.0538                            | 57                               | 0.2222    | 56                               | 0.0299    | 13                                | 364                              | 7                  | 204                              | 21 | 190 |    | 8                             |
| 23       |         | 13      | 0.02            |                                   | 0.00                             |           | 0.01                             |           | 0.00                              |                                  | 16                 |                                  |    |     | 95 |                               |
|          | 27      | 03      |                 | 0.0524                            | 37                               | 0.2195    | 77                               | 0.0303    | 12                                | 303                              | 7                  | 201                              | 15 | 193 |    | 7                             |
| 83       | 11      | 11      | 1.00            |                                   | 0.01                             |           | 0.07                             |           | 0.00                              |                                  | 55                 |                                  |    |     | 85 |                               |
|          | 7       | 8       |                 | 0.0618                            | 62                               | 0.2543    | 24                               | 0.0315    | 35                                | 666                              | 2                  | 230                              | 59 | 200 |    | 22                            |
| 30       |         |         | 1.38            |                                   | 0.01                             |           | 0.05                             |           | 0.00                              |                                  | 44                 |                                  |    |     | 91 |                               |
|          | 72      | 52      |                 | 0.0587                            | 22                               | 0.2642    | 95                               | 0.0346    | 30                                | 555                              | 2                  | 238                              | 48 | 219 |    | 18                            |
| 13       | 23      | 45      | 0.50            |                                   | 0.00                             |           | 0.02                             |           | 0.00                              |                                  | 21                 |                                  |    |     | 98 |                               |
|          | 0       | 8       |                 | 0.0493                            | 47                               | 0.2444    | 53                               | 0.0354    | 15                                | 162                              | 4                  | 222                              | 21 | 224 |    | 9                             |
| 49       | 16      | 20      | 0.80            |                                   | 0.00                             |           | 0.04                             |           | 0.00                              |                                  | 30                 |                                  |    |     | 90 |                               |
|          | 0       | 1       |                 | 0.0569                            | 75                               | 0.2936    | 07                               | 0.0374    | 17                                | 489                              | 0                  | 261                              | 32 | 237 |    | 11                            |
| 1        | 23      | 31      | 0.75            |                                   | 0.00                             |           | 0.02                             |           | 0.00                              |                                  | 20                 |                                  |    |     | 97 |                               |
|          | 3       | 2       |                 | 0.0494                            | 46                               | 0.2573    | 60                               | 0.0378    | 15                                | 166                              | 8                  | 232                              | 21 | 239 |    | 10                            |

| Sp<br>ot | Th      | U       | Th/<br>U | Isotopic Ratios                      |                                     |        |                                     |        |                                      | Isotopic Ages (Ma) |                                     |      |                                     |      |        | Conc<br>or-<br>Danc<br>e<br>% |
|----------|---------|---------|----------|--------------------------------------|-------------------------------------|--------|-------------------------------------|--------|--------------------------------------|--------------------|-------------------------------------|------|-------------------------------------|------|--------|-------------------------------|
|          | PP<br>m | PP<br>m |          | <sup>207</sup> Pb/ <sup>206</sup> Pb | <sup>207</sup> Pb/ <sup>235</sup> U |        | <sup>206</sup> Pb/ <sup>238</sup> U |        | <sup>207</sup> Pb/ <sup>206</sup> Pb |                    | <sup>207</sup> Pb/ <sup>235</sup> U |      | <sup>206</sup> Pb/ <sup>238</sup> U |      | 1<br>σ |                               |
|          |         |         |          |                                      | 1σ                                  | 1σ     | 1σ                                  | 1σ     | 1σ                                   | 1σ                 | 1σ                                  |      |                                     |      |        |                               |
|          |         |         |          |                                      |                                     |        |                                     |        |                                      |                    |                                     |      |                                     |      |        |                               |
| 89       | 87      | 45      | 1.94     | 0.0927                               | 05                                  | 0.2964 | 43                                  | 0.0380 | 46                                   | 1482               | 36                                  | 264  | 5                                   | 240  | 28     | 90                            |
| 40       | 13      | 25      | 0.52     |                                      | 0.00                                |        | 0.03                                |        | 0.00                                 |                    | 24                                  |      |                                     |      |        | 98                            |
|          | 4       | 7       |          | 0.0509                               | 56                                  | 0.2891 | 41                                  | 0.0414 | 18                                   | 235                | 9                                   | 258  | 27                                  | 262  | 11     |                               |
| 76       | 66      | 10      | 0.61     |                                      | 0.01                                |        | 0.07                                |        | 0.00                                 |                    | 49                                  |      |                                     |      |        | 91                            |
|          |         | 8       |          | 0.0635                               | 43                                  | 0.3271 | 95                                  | 0.0418 | 39                                   | 724                | 0                                   | 287  | 61                                  | 264  | 24     |                               |
| 74       | 98      | 14      | 0.70     |                                      | 0.00                                |        | 0.04                                |        | 0.00                                 |                    | 31                                  |      |                                     |      |        | 97                            |
|          |         | 0       |          | 0.0545                               | 76                                  | 0.3071 | 58                                  | 0.0419 | 21                                   | 390                | 8                                   | 272  | 36                                  | 265  | 13     |                               |
| 95       | 82      | 11      | 0.72     |                                      | 0.00                                |        | 0.04                                |        | 0.00                                 |                    | 28                                  |      |                                     |      |        | 94                            |
|          |         | 4       |          | 0.0572                               | 71                                  | 0.3494 | 70                                  | 0.0457 | 24                                   | 500                | 2                                   | 304  | 35                                  | 288  | 15     |                               |
| 62       | 11      | 15      | 0.73     |                                      | 0.01                                |        | 0.06                                |        | 0.00                                 |                    | 39                                  |      |                                     |      |        | 90                            |
|          |         | 3       |          | 4                                    | 0.0616                              | 06     | 0.3805                              | 90     | 0.0474                               | 28                 | 661                                 | 0    | 327                                 | 51   | 298    |                               |
| 78       | 12      | 11      | 1.11     |                                      | 0.01                                |        | 0.11                                |        | 0.00                                 |                    | 54                                  |      |                                     |      |        | 91                            |
|          |         | 4       |          | 2                                    | 0.0620                              | 61     | 0.4075                              | 07     | 0.0505                               | 42                 | 675                                 | 4    | 347                                 | 80   | 318    |                               |
| 87       | 83      | 12      | 0.68     |                                      | 0.00                                |        | 0.03                                |        | 0.00                                 |                    | 14                                  |      |                                     |      |        | 85                            |
|          |         | 3       |          | 23                                   | 0.0623                              | 39     | 0.4865                              | 64     | 0.0556                               | 23                 | 684                                 | 0    | 402                                 | 25   | 349    |                               |
| 10       | 21      | 25      | 0.85     |                                      | 0.01                                |        | 0.69                                |        | 0.01                                 |                    | 10                                  |      |                                     |      |        | 93                            |
|          |         | 8       |          | 5                                    | 0.1655                              | 00     | 9.8561                              | 92     | 0.4224                               | 56                 | 2512                                | 0    | 2421                                | 65   | 2271   |                               |
| 94       | 47      | 10      | 0.45     |                                      | 0.00                                |        | 0.69                                |        | 0.01                                 |                    |                                     |      |                                     |      |        | 98                            |
|          |         | 4       |          | 0.1554                               | 92                                  | 9.6355 | 13                                  | 0.4425 | 81                                   | 2407               | 98                                  | 2401 | 66                                  | 2362 | 81     |                               |
| 16       | 39      | 78      | 0.51     |                                      | 0.01                                | 12.485 | 0.92                                |        | 0.02                                 |                    | 10                                  |      |                                     |      |        | 99                            |
|          |         |         |          | 0.1751                               | 09                                  | 9      | 11                                  | 0.5123 | 01                                   | 2607               | 2                                   | 2642 | 69                                  | 2666 | 86     |                               |
| 47       | 11      | 21      | 0.53     |                                      | 0.01                                |        | 0.06                                |        | 0.00                                 |                    | 42                                  |      |                                     |      |        | 85                            |
|          |         | 5       |          | 8                                    | 0.0634                              | 17     | 0.3308                              | 92     | 0.0397                               | 39                 | 723                                 | 3    | 290                                 | 53   | 251    |                               |
| 14       | 11      | 23      | 0.47     |                                      | 0.01                                |        | 0.03                                |        | 0.00                                 |                    | 45                                  |      |                                     |      |        | 84                            |
|          |         | 1       |          | 6                                    | 0.0612                              | 38     | 0.1651                              | 91     | 0.0208                               | 16                 | 646                                 | 8    | 155                                 | 34   | 132    |                               |
| 15       | 19      | 24      | 0.79     |                                      | 0.01                                |        | 0.04                                |        | 0.00                                 |                    | 46                                  |      |                                     |      |        | 81                            |
|          |         | 4       |          | 6                                    | 0.0588                              | 39     | 0.1620                              | 03     | 0.0198                               | 15                 | 560                                 | 2    | 152                                 | 35   | 127    |                               |
| 93       | 11      | 12      | 0.09     |                                      | 0.00                                |        | 0.02                                |        | 0.00                                 |                    | 23                                  |      |                                     |      |        | 81                            |
|          |         | 3       |          | 75                                   | 0.0596                              | 65     | 0.2116                              | 48     | 0.0253                               | 11                 | 588                                 | 6    | 195                                 | 21   | 161    |                               |
| 41       | 71      | 15      | 0.47     |                                      | 0.10                                |        | 0.63                                |        | 0.00                                 |                    | 18                                  |      | 36                                  |      |        | 8                             |
|          |         | 2       |          | 0.1349                               | 99                                  | 0.7609 | 97                                  | 0.0273 | 56                                   | 2163               | 09                                  | 575  | 9                                   | 174  | 35     |                               |
| 22       | 11      | 16      | 0.71     |                                      | 0.01                                |        | 0.05                                |        | 0.00                                 |                    | 42                                  |      |                                     |      |        | 79                            |
|          |         | 4       |          | 0                                    | 0.0678                              | 35     | 0.2838                              | 99     | 0.0325                               | 23                 | 864                                 | 0    | 254                                 | 47   | 206    |                               |
| 17       | 19      | 26      | 0.74     |                                      | 0.01                                |        | 0.04                                |        | 0.00                                 |                    | 56                                  |      |                                     |      |        | 76                            |
|          |         | 4       |          | 4                                    | 0.0662                              | 87     | 0.1599                              | 75     | 0.0186                               | 17                 | 812                                 | 1    | 151                                 | 42   | 119    |                               |

| Sp<br>ot | Th      | U       | Isotopic Ratios |                                  |                                 |                                 |                                  |                                 |                                 | Isotopic Ages (Ma)              |                                 |                 |               |                | Conc |
|----------|---------|---------|-----------------|----------------------------------|---------------------------------|---------------------------------|----------------------------------|---------------------------------|---------------------------------|---------------------------------|---------------------------------|-----------------|---------------|----------------|------|
|          | pp<br>m | pp<br>m | Th/<br>U        | <sup>207</sup> Pb/ <sup>20</sup> | <sup>207</sup> Pb/ <sup>2</sup> | <sup>206</sup> Pb/ <sup>2</sup> | <sup>207</sup> Pb/ <sup>20</sup> | <sup>207</sup> Pb/ <sup>2</sup> | <sup>206</sup> Pb/ <sup>2</sup> | <sup>207</sup> Pb/ <sup>2</sup> | <sup>206</sup> Pb/ <sup>2</sup> | <sup>1</sup>    | <sup>1</sup>  | Danc<br>e<br>% |      |
|          |         |         |                 | <sup>6</sup> Pb                  | <sup>35</sup> U                 | <sup>38</sup> U                 | <sup>1σ</sup>                    | <sup>6</sup> Pb                 | <sup>1σ</sup>                   | <sup>35</sup> U                 | <sup>1σ</sup>                   | <sup>38</sup> U | <sup>1σ</sup> |                |      |
|          |         |         |                 |                                  |                                 |                                 |                                  |                                 |                                 |                                 |                                 |                 |               |                |      |
| 84       | 25      | 26      | 0.97            |                                  | 0.00                            | 0.08                            |                                  | 0.00                            |                                 | 22                              |                                 |                 |               |                | 76   |
|          | 3       | 1       |                 | 0.0729                           | 81                              | 0.6521                          | 03                               | 0.0642                          | 34                              | 1010                            | 7                               | 510             | 49            | 401            | 20   |
| 91       | 19      | 45      | 0.44            |                                  | 0.00                            | 0.06                            |                                  | 0.00                            |                                 | 29                              |                                 |                 |               |                | 74   |
|          | 7       | 2       |                 | 0.0573                           | 77                              | 0.3800                          | 31                               | 0.0481                          | 26                              | 502                             | 3                               | 327             | 46            | 303            | 16   |
| 25       | 19      | 35      | 0.56            |                                  | 0.00                            | 0.04                            |                                  | 0.00                            |                                 | 30                              |                                 |                 |               |                | 72   |
|          | 5       | 1       |                 | 0.0504                           | 82                              | 0.2529                          | 87                               | 0.0364                          | 20                              | 212                             | 5                               | 229             | 39            | 231            | 12   |
| 53       | 35      | 57      | 0.61            |                                  | 0.00                            | 0.06                            |                                  | 0.00                            |                                 | 32                              |                                 |                 |               |                | 72   |
|          | 1       | 3       |                 | 0.0557                           | 86                              | 0.3415                          | 25                               | 0.0445                          | 22                              | 440                             | 5                               | 298             | 47            | 281            | 13   |
| 32       | 24      | 33      | 0.74            |                                  | 0.00                            | 0.03                            |                                  | 0.00                            |                                 | 23                              |                                 |                 |               |                | 69   |
|          | 9       | 5       |                 | 0.0704                           | 79                              | 0.2623                          | 24                               | 0.0272                          | 14                              | 940                             | 2                               | 236             | 26            | 173            | 9    |
| 100      | 45      | 77      | 0.58            |                                  | 0.01                            | 0.04                            |                                  | 0.00                            |                                 | 32                              |                                 |                 |               |                | 68   |
|          |         |         |                 | 0.0805                           | 30                              | 0.2693                          | 78                               | 0.0278                          | 21                              | 1209                            | 9                               | 242             | 38            | 177            | 13   |
| 35       | 13      | 26      | 0.52            |                                  | 0.01                            | 0.03                            |                                  | 0.00                            |                                 | 36                              |                                 |                 |               |                | 63   |
|          | 5       | 1       |                 | 0.0700                           | 20                              | 0.1952                          | 58                               | 0.0195                          | 13                              | 928                             | 5                               | 181             | 30            | 125            | 8    |
| 60       | 19      | 19      | 1.00            |                                  | 0.01                            | 0.03                            |                                  | 0.00                            |                                 | 35                              |                                 |                 |               |                | 63   |
|          | 0       | 1       |                 | 0.0749                           | 27                              | 0.1878                          | 46                               | 0.0190                          | 14                              | 1065                            | 4                               | 175             | 30            | 121            | 9    |
| 86       | 33      | 68      | 0.49            |                                  | 0.00                            | 0.02                            |                                  | 0.00                            |                                 | 18                              |                                 |                 |               |                | 62   |
|          | 2       | 4       |                 | 0.0745                           | 71                              | 0.2478                          | 66                               | 0.0241                          | 12                              | 1056                            | 9                               | 225             | 22            | 154            | 8    |
| 69       | 25      | 56      | 0.46            |                                  | 0.00                            | 0.03                            |                                  | 0.00                            |                                 | 32                              |                                 |                 |               |                | 60   |
|          | 7       | 3       |                 | 0.0588                           | 90                              | 0.2098                          | 84                               | 0.0259                          | 14                              | 559                             | 8                               | 193             | 32            | 165            | 9    |
| 44       | 33      | 35      | 0.94            |                                  | 0.01                            | 0.05                            |                                  | 0.00                            |                                 | 49                              |                                 |                 |               |                | 59   |
|          | 3       | 3       |                 | 0.0751                           | 75                              | 0.2035                          | 04                               | 0.0195                          | 16                              | 1070                            | 3                               | 188             | 43            | 125            | 10   |
| 8        | 61      | 84      | 0.73            |                                  | 0.00                            | 0.03                            |                                  | 0.00                            |                                 | 32                              |                                 |                 |               |                | 58   |
|          | 5       | 3       |                 | 0.0517                           | 90                              | 0.1844                          | 74                               | 0.0259                          | 13                              | 273                             | 8                               | 172             | 32            | 165            | 8    |
| 28       | 26      | 38      | 0.68            |                                  | 0.02                            | 0.08                            |                                  | 0.00                            |                                 | 71                              |                                 |                 |               |                | 58   |
|          | 2       | 6       |                 | 0.0800                           | 74                              | 0.2480                          | 74                               | 0.0232                          | 20                              | 1197                            | 5                               | 225             | 71            | 148            | 12   |
| 59       | 43      | 27      | 0.15            |                                  | 0.01                            | 0.05                            |                                  | 0.00                            |                                 | 40                              |                                 |                 |               |                | 58   |
|          |         | 7       |                 | 0.0583                           | 11                              | 0.2632                          | 68                               | 0.0328                          | 21                              | 539                             | 5                               | 237             | 46            | 208            | 13   |
| 88       | 92      | 15      | 0.60            |                                  | 0.01                            | 0.04                            |                                  | 0.00                            |                                 | 38                              |                                 |                 |               |                | 58   |
|          |         | 4       |                 | 0.0898                           | 71                              | 0.2095                          | 44                               | 0.0199                          | 18                              | 1421                            | 5                               | 193             | 37            | 127            | 12   |
| 57       | 88      | 10      | 0.87            |                                  | 0.01                            | 0.07                            |                                  | 0.00                            |                                 | 42                              |                                 |                 |               |                | 55   |
|          |         | 1       |                 | 0.0908                           | 88                              | 0.3157                          | 31                               | 0.0279                          | 29                              | 1443                            | 3                               | 279             | 56            | 177            | 18   |
| 12       | 20      | 15      | 1.36            |                                  | 0.01                            | 0.06                            |                                  | 0.00                            |                                 | 44                              |                                 |                 |               |                | 50   |
|          | 6       | 1       |                 | 0.0851                           | 81                              | 0.2635                          | 11                               | 0.0224                          | 21                              | 1317                            | 5                               | 238             | 49            | 143            | 13   |
| 34       | 19      | 18      | 1.05            |                                  | 0.04                            | 0.14                            |                                  | 0.00                            |                                 | 11                              |                                 | 12              |               |                | 5    |
|          | 3       | 4       |                 | 0.0561                           | 84                              | 0.1550                          | 29                               | 0.0201                          | 21                              | 455                             | 37                              | 146             | 6             | 128            | 13   |

| Spot | Th  | U   | Isotopic Ratios |                                  |                                 |        |                                 |        |                                  | Isotopic Ages (Ma) |                                 |     |                                 |     |      |    | Conc |
|------|-----|-----|-----------------|----------------------------------|---------------------------------|--------|---------------------------------|--------|----------------------------------|--------------------|---------------------------------|-----|---------------------------------|-----|------|----|------|
|      | ppm | ppm | Th/<br>U        | <sup>207</sup> Pb/ <sup>20</sup> | <sup>207</sup> Pb/ <sup>2</sup> |        | <sup>206</sup> Pb/ <sup>2</sup> |        | <sup>207</sup> Pb/ <sup>20</sup> |                    | <sup>207</sup> Pb/ <sup>2</sup> |     | <sup>206</sup> Pb/ <sup>2</sup> |     | Danc |    |      |
|      |     |     |                 | <sup>6</sup> Pb                  |                                 |        |                                 |        |                                  |                    |                                 |     |                                 |     |      |    |      |
|      |     |     |                 | 1σ                               |                                 | 1σ     |                                 | 1σ     |                                  | 1σ                 |                                 | 1σ  |                                 |     |      |    |      |
| 42   | 79  | 81  | 0.97            | 0.0467                           | 0.06                            | 0.1410 | 0.20                            | 0.0219 | 0.00                             | 32                 | 80                              | 134 | 2                               | 140 | 25   | 5  |      |
| 85   | 43  | 67  | 0.64            |                                  | 0.01                            |        | 0.03                            |        | 0.00                             |                    | 44                              |     |                                 |     |      | 48 |      |
|      | 6   | 9   |                 | 0.0611                           | 33                              | 0.1471 | 77                              | 0.0175 | 12                               | 641                | 9                               | 139 | 33                              | 112 | 8    |    |      |
| 38   | 19  | 24  | 0.80            |                                  | 0.02                            |        | 0.06                            |        | 0.00                             |                    | 40                              |     |                                 |     |      | 40 |      |
|      | 5   | 5   |                 | 0.1001                           | 04                              | 0.2940 | 52                              | 0.0223 | 20                               | 1627               | 4                               | 262 | 51                              | 142 | 12   |    |      |
| 21   | 16  | 14  | 1.14            |                                  | 0.02                            |        | 0.08                            |        | 0.00                             |                    | 64                              |     |                                 |     |      | 4  |      |
|      | 67  | 61  |                 | 0.0858                           | 65                              | 0.2061 | 62                              | 0.0174 | 22                               | 1332               | 9                               | 190 | 73                              | 111 | 14   |    |      |
| 75   | 29  | 31  | 0.92            |                                  | 0.01                            |        | 0.03                            |        | 0.00                             |                    | 18                              |     |                                 |     |      | 33 |      |
|      | 3   | 9   |                 | 0.1073                           | 08                              | 0.3007 | 43                              | 0.0210 | 11                               | 1754               | 3                               | 267 | 27                              | 134 | 7    |    |      |
| 52   | 70  | 93  | 0.76            |                                  | 0.10                            |        | 0.28                            |        | 0.00                             |                    | 17                              |     | 24                              |     |      | 32 |      |
|      |     |     |                 | 0.0714                           | 23                              | 0.1817 | 48                              | 0.0185 | 37                               | 970                | 06                              | 170 | 5                               | 118 | 23   |    |      |
| 5    | 50  | 79  | 0.63            |                                  | 0.06                            |        | 0.16                            |        | 0.00                             |                    | 13                              |     | 14                              |     |      | 31 |      |
|      |     |     |                 | 0.0766                           | 12                              | 0.1846 | 66                              | 0.0175 | 27                               | 1110               | 01                              | 172 | 3                               | 112 | 17   |    |      |
| 45   | 22  | 21  | 1.05            |                                  | 0.04                            |        | 0.09                            |        | 0.00                             |                    | 10                              |     |                                 |     |      | 3  |      |
|      | 1   | 0   |                 | 0.0517                           | 25                              | 0.1063 | 58                              | 0.0149 | 18                               | 270                | 95                              | 103 | 88                              | 95  | 12   |    |      |
| 19   | 69  | 13  | 0.52            |                                  | 0.01                            |        | 0.05                            |        | 0.00                             |                    | 27                              |     |                                 |     |      | 28 |      |
|      | 1   | 36  |                 | 0.0786                           | 06                              | 0.3232 | 30                              | 0.0298 | 14                               | 1161               | 2                               | 284 | 41                              | 190 | 9    |    |      |
| 65   | 19  | 35  | 0.54            |                                  | 0.02                            |        | 0.10                            |        | 0.00                             |                    | 58                              |     |                                 |     |      | 25 |      |
|      | 2   | 8   |                 | 0.0802                           | 18                              | 0.3477 | 86                              | 0.0315 | 24                               | 1201               | 1                               | 303 | 82                              | 200 | 15   |    |      |
| 67   | 79  | 11  | 0.66            |                                  | 0.02                            |        | 0.11                            |        | 0.00                             |                    | 58                              |     |                                 |     |      | 25 |      |
|      |     | 9   |                 | 0.0701                           | 05                              | 0.3247 | 18                              | 0.0336 | 29                               | 932                | 3                               | 285 | 86                              | 213 | 18   |    |      |
| 7    | 11  | 17  | 0.67            |                                  | 0.02                            |        | 0.07                            |        | 0.00                             |                    | 38                              |     |                                 |     |      | 23 |      |
|      | 5   | 0   |                 | 0.1220                           | 46                              | 0.3469 | 41                              | 0.0212 | 15                               | 1986               | 0                               | 302 | 56                              | 136 | 10   |    |      |
| 43   | 27  | 91  | 0.29            |                                  | 0.04                            |        | 0.32                            |        | 0.00                             |                    | 58                              |     | 16                              |     |      | 17 |      |
|      |     |     |                 | 0.1527                           | 50                              | 1.0439 | 88                              | 0.0478 | 53                               | 2376               | 7                               | 726 | 3                               | 301 | 33   |    |      |
| 54   | 29  | 94  | 0.31            |                                  | 0.04                            |        | 0.25                            |        | 0.00                             |                    | 11                              |     | 18                              |     |      | 17 |      |
|      |     |     |                 | 0.0751                           | 51                              | 0.3796 | 09                              | 0.0367 | 48                               | 1071               | 83                              | 327 | 5                               | 232 | 30   |    |      |
| 6    | 63  | 81  | 0.78            |                                  | 0.02                            |        | 0.07                            |        | 0.00                             |                    | 21                              |     |                                 |     |      | 15 |      |
|      |     |     |                 | 0.1885                           | 45                              | 0.4992 | 66                              | 0.0174 | 14                               | 2729               | 5                               | 411 | 52                              | 111 | 9    |    |      |
| 46   | 37  | 10  | 0.37            |                                  | 0.01                            |        | 0.04                            |        | 0.00                             |                    | 42                              |     |                                 |     |      | 15 |      |
|      | 4   | 09  |                 | 0.0548                           | 28                              | 0.1589 | 18                              | 0.0210 | 11                               | 404                | 7                               | 150 | 37                              | 134 | 7    |    |      |
| 66   | 21  | 37  | 0.58            |                                  | 0.02                            |        | 0.10                            |        | 0.00                             |                    | 67                              |     |                                 |     |      | 14 |      |
|      | 5   | 2   |                 | 0.0839                           | 70                              | 0.2627 | 14                              | 0.0227 | 25                               | 1290               | 5                               | 237 | 82                              | 145 | 16   |    |      |
| 56   | 27  | 53  | 0.51            |                                  | 0.02                            |        | 0.07                            |        | 0.00                             |                    | 55                              |     |                                 |     |      | 13 |      |
|      | 0   | 2   |                 | 0.0818                           | 13                              | 0.2558 | 81                              | 0.0227 | 19                               | 1240               | 2                               | 231 | 63                              | 145 | 12   |    |      |

| Spot    | Th  | U   | Isotopic Ratios |                                      |                                     |        |                                     |        |                                      | Isotopic Ages (Ma)                  |     |                                     |    |     |    | Concordance |
|---------|-----|-----|-----------------|--------------------------------------|-------------------------------------|--------|-------------------------------------|--------|--------------------------------------|-------------------------------------|-----|-------------------------------------|----|-----|----|-------------|
|         | PPm | PPm | Th/U            | <sup>207</sup> Pb/ <sup>206</sup> Pb | <sup>207</sup> Pb/ <sup>235</sup> U |        | <sup>206</sup> Pb/ <sup>238</sup> U |        | <sup>207</sup> Pb/ <sup>206</sup> Pb | <sup>207</sup> Pb/ <sup>235</sup> U |     | <sup>206</sup> Pb/ <sup>238</sup> U |    | 1σ  |    |             |
|         |     |     |                 | 1σ                                   | 1σ                                  | 1σ     | 1σ                                  | 1σ     | 1σ                                   | 1σ                                  |     |                                     |    |     |    |             |
|         |     |     |                 |                                      |                                     |        |                                     |        |                                      |                                     |     |                                     |    |     |    |             |
| 97      | 102 | 86  | 1.19            | 0.1665                               | 0.0326                              | 0.7272 | 0.1672                              | 0.0336 | 41                                   | 2523                                | 5   | 555                                 | 99 | 213 | 26 | 10          |
| JX12-11 |     |     |                 | Kim                                  |                                     |        |                                     |        |                                      |                                     |     |                                     |    |     |    |             |
| 102     | 412 | 366 | 1.13            | 0.0534                               | 0.0047                              | 0.1258 | 0.0108                              | 0.0169 | 0.0006                               | 346                                 | 200 | 120                                 | 10 | 108 | 4  | 89          |
| 86      | 316 | 446 | 0.71            | 0.0550                               | 0.0043                              | 0.1264 | 0.0091                              | 0.0171 | 0.0006                               | 413                                 | 174 | 121                                 | 8  | 109 | 4  | 90          |
| 18      | 366 | 515 | 0.71            | 0.0484                               | 0.0030                              | 0.1168 | 0.0069                              | 0.0176 | 0.0005                               | 117                                 | 141 | 112                                 | 6  | 113 | 3  | 99          |
| 73      | 214 | 383 | 0.56            | 0.0545                               | 0.0040                              | 0.1281 | 0.0086                              | 0.0177 | 0.0006                               | 391                                 | 165 | 122                                 | 8  | 113 | 4  | 91          |
| 46      | 318 | 672 | 0.47            | 0.0519                               | 0.0034                              | 0.1277 | 0.0079                              | 0.0179 | 0.0006                               | 280                                 | 156 | 122                                 | 7  | 114 | 4  | 93          |
| 60      | 233 | 586 | 0.40            | 0.0498                               | 0.0040                              | 0.1205 | 0.0087                              | 0.0181 | 0.0006                               | 183                                 | 178 | 116                                 | 8  | 116 | 4  | 99          |
| 106     | 249 | 460 | 0.54            | 0.0517                               | 0.0035                              | 0.1300 | 0.0084                              | 0.0182 | 0.0005                               | 272                                 | 156 | 124                                 | 8  | 116 | 3  | 93          |
| 45      | 194 | 335 | 0.58            | 0.0530                               | 0.0039                              | 0.1327 | 0.0096                              | 0.0182 | 0.0006                               | 328                                 | 168 | 126                                 | 9  | 116 | 4  | 91          |
| 50      | 174 | 379 | 0.46            | 0.0515                               | 0.0057                              | 0.1241 | 0.0115                              | 0.0182 | 0.0006                               | 261                                 | 237 | 119                                 | 10 | 116 | 4  | 98          |
| 54      | 267 | 467 | 0.57            | 0.0470                               | 0.0030                              | 0.1167 | 0.0069                              | 0.0183 | 0.0006                               | 50.1                                | 144 | 112                                 | 6  | 117 | 4  | 95          |
| 33      | 399 | 369 | 1.08            | 0.0543                               | 0.0034                              | 0.1362 | 0.0079                              | 0.0184 | 0.0006                               | 383                                 | 141 | 130                                 | 7  | 118 | 4  | 90          |
| 1       | 320 | 349 | 0.92            | 0.0545                               | 0.0041                              | 0.1365 | 0.0099                              | 0.0184 | 0.0006                               | 391                                 | 169 | 130                                 | 9  | 118 | 4  | 90          |
| 28      | 342 | 610 | 0.56            | 0.0509                               | 0.0027                              | 0.1323 | 0.0067                              | 0.0185 | 0.0005                               | 235                                 | 124 | 126                                 | 6  | 118 | 3  | 93          |
| 109     | 84  | 188 | 0.45            | 0.0564                               | 0.0052                              | 0.1378 | 0.0114                              | 0.0186 | 0.0007                               | 478                                 | 204 | 131                                 | 10 | 119 | 4  | 90          |
| 61      | 51  | 134 | 0.38            | 0.0567                               | 0.0075                              | 0.1330 | 0.0164                              | 0.0187 | 0.0008                               | 480                                 | 296 | 127                                 | 15 | 120 | 5  | 94          |
| 65      | 147 | 305 | 0.48            | 0.0520                               | 0.0052                              | 0.1253 | 0.0096                              | 0.0187 | 0.0007                               | 283                                 | 230 | 120                                 | 9  | 120 | 4  | 99          |
| 53      | 488 | 388 | 1.26            | 0.0504                               | 0.0029                              | 0.1281 | 0.0070                              | 0.0187 | 0.0006                               | 213                                 | 132 | 122                                 | 6  | 120 | 4  | 97          |



| Sp<br>ot | Th      | U       | Isotopic Ratios |                                      |                                     |        |                                     |        |                                      | Isotopic Ages (Ma)                  |         |                                     |    |        |        | Conc   |
|----------|---------|---------|-----------------|--------------------------------------|-------------------------------------|--------|-------------------------------------|--------|--------------------------------------|-------------------------------------|---------|-------------------------------------|----|--------|--------|--------|
|          | PP<br>m | PP<br>m | Th/<br>U        | <sup>207</sup> Pb/ <sup>206</sup> Pb | <sup>207</sup> Pb/ <sup>235</sup> U |        | <sup>206</sup> Pb/ <sup>238</sup> U |        | <sup>207</sup> Pb/ <sup>206</sup> Pb | <sup>207</sup> Pb/ <sup>235</sup> U |         | <sup>206</sup> Pb/ <sup>238</sup> U |    | 1<br>σ | 1<br>σ | e<br>% |
|          |         |         |                 |                                      | 1σ                                  | 1σ     | 1σ                                  | 1σ     |                                      | 1σ                                  | 1σ      |                                     |    |        |        |        |
|          |         |         |                 |                                      |                                     |        |                                     |        |                                      |                                     |         |                                     |    |        |        |        |
| 2        | 57<br>2 | 94<br>7 | 0.60            | 0.0495                               | 0.00<br>23                          | 0.1263 | 0.00<br>55                          | 0.0188 | 0.00<br>05                           | 169                                 | 10<br>9 | 121                                 | 5  | 120    | 3      | 99     |
| 55       | 98      | 29<br>3 | 0.33            | 0.0502                               | 0.00<br>38                          | 0.1240 | 0.00<br>86                          | 0.0188 | 0.00<br>06                           | 211                                 | 17<br>6 | 119                                 | 8  | 120    | 4      | 98     |
| 52       | 18<br>5 | 51<br>9 | 0.36            | 0.0519                               | 0.00<br>29                          | 0.1341 | 0.00<br>70                          | 0.0188 | 0.00<br>05                           | 280                                 | 15<br>8 | 128                                 | 6  | 120    | 3      | 93     |
| 25       | 36      | 88      | 0.41            | 0.0510                               | 0.00<br>66                          | 0.1231 | 0.01<br>42                          | 0.0189 | 0.00<br>08                           | 239                                 | 28<br>3 | 118                                 | 13 | 121    | 5      | 97     |
| 47       | 22<br>1 | 39<br>7 | 0.56            | 0.0507                               | 0.00<br>33                          | 0.1308 | 0.00<br>76                          | 0.0189 | 0.00<br>06                           | 233                                 | 14<br>5 | 125                                 | 7  | 121    | 4      | 96     |
| 71       | 10<br>1 | 21<br>0 | 0.48            | 0.0512                               | 0.00<br>44                          | 0.1324 | 0.01<br>14                          | 0.0190 | 0.00<br>06                           | 256                                 | 19<br>8 | 126                                 | 10 | 121    | 4      | 95     |
| 29       | 10<br>5 | 22<br>1 | 0.47            | 0.0560                               | 0.00<br>44                          | 0.1395 | 0.00<br>97                          | 0.0191 | 0.00<br>07                           | 450                                 | 14<br>2 | 133                                 | 9  | 122    | 4      | 91     |
| 58       | 25<br>7 | 51<br>7 | 0.50            | 0.0540                               | 0.00<br>38                          | 0.1419 | 0.00<br>99                          | 0.0193 | 0.00<br>06                           | 372                                 | 15<br>9 | 135                                 | 9  | 123    | 4      | 90     |
| 23       | 22<br>9 | 34<br>3 | 0.67            | 0.0538                               | 0.00<br>32                          | 0.1421 | 0.00<br>83                          | 0.0193 | 0.00<br>06                           | 361                                 | 14<br>0 | 135                                 | 7  | 123    | 4      | 90     |
| 5        | 12<br>5 | 23<br>4 | 0.53            | 0.0507                               | 0.00<br>43                          | 0.1294 | 0.01<br>00                          | 0.0194 | 0.00<br>06                           | 233                                 | 19<br>6 | 124                                 | 9  | 124    | 4      | 99     |
| 49       | 45<br>8 | 42<br>4 | 1.08            | 0.0536                               | 0.00<br>37                          | 0.1413 | 0.00<br>91                          | 0.0194 | 0.00<br>06                           | 367                                 | 15<br>6 | 134                                 | 8  | 124    | 4      | 92     |
| 12       | 79      | 17<br>5 | 0.45            | 0.0567                               | 0.00<br>46                          | 0.1455 | 0.01<br>03                          | 0.0196 | 0.00<br>06                           | 480                                 | 18<br>1 | 138                                 | 9  | 125    | 4      | 90     |
| 21       | 18      | 44      | 0.41            | 0.0634                               | 0.01<br>23                          | 0.1448 | 0.01<br>97                          | 0.0196 | 0.00<br>10                           | 720                                 | 41<br>5 | 137                                 | 17 | 125    | 6      | 90     |
| 66       | 14<br>7 | 33<br>3 | 0.44            | 0.0474                               | 0.00<br>41                          | 0.1278 | 0.00<br>99                          | 0.0198 | 0.00<br>06                           | 77.9                                | 18<br>7 | 122                                 | 9  | 126    | 4      | 96     |
| 79       | 90      | 18<br>3 | 0.49            | 0.0551                               | 0.00<br>52                          | 0.1436 | 0.01<br>13                          | 0.0198 | 0.00<br>07                           | 417                                 | 21<br>3 | 136                                 | 10 | 126    | 4      | 92     |
| 74       | 73      | 18<br>0 | 0.41            | 0.0521                               | 0.00<br>46                          | 0.1403 | 0.01<br>12                          | 0.0203 | 0.00<br>07                           | 300                                 | 20<br>4 | 133                                 | 10 | 129    | 4      | 97     |
| 22       | 19<br>7 | 39<br>4 | 0.50            | 0.0534                               | 0.00<br>35                          | 0.1502 | 0.00<br>90                          | 0.0205 | 0.00<br>06                           | 346                                 | 14<br>8 | 142                                 | 8  | 131    | 4      | 91     |
| 4        | 12<br>1 | 25<br>0 | 0.49            | 0.0555                               | 0.00<br>41                          | 0.1520 | 0.00<br>93                          | 0.0205 | 0.00<br>07                           | 432                                 | 16<br>5 | 144                                 | 8  | 131    | 4      | 90     |

| Sp<br>ot | Th      | U        | Isotopic Ratios |                                      |                                     |        |                                     |        |                                      | Isotopic Ages (Ma)                  |         |                                     |    |      |   | Conc |
|----------|---------|----------|-----------------|--------------------------------------|-------------------------------------|--------|-------------------------------------|--------|--------------------------------------|-------------------------------------|---------|-------------------------------------|----|------|---|------|
|          | PP<br>m | PP<br>m  | Th/<br>U        | <sup>207</sup> Pb/ <sup>206</sup> Pb | <sup>207</sup> Pb/ <sup>235</sup> U |        | <sup>206</sup> Pb/ <sup>238</sup> U |        | <sup>207</sup> Pb/ <sup>206</sup> Pb | <sup>207</sup> Pb/ <sup>235</sup> U |         | <sup>206</sup> Pb/ <sup>238</sup> U |    | Danc |   |      |
|          |         |          |                 |                                      | 1σ                                  | 1σ     | 1σ                                  | 1σ     |                                      | 1σ                                  | 1σ      |                                     |    |      |   |      |
|          |         |          |                 |                                      |                                     |        |                                     |        |                                      |                                     |         | 1σ                                  | 1σ |      |   |      |
| 11       | 24<br>4 | 50<br>1  | 0.49            | 0.0555                               | 0.00<br>40                          | 0.1907 | 0.01<br>43                          | 0.0255 | 0.00<br>08                           | 432                                 | 15<br>9 | 177                                 | 12 | 162  | 5 | 91   |
| 108      | 23<br>4 | 26<br>0  | 0.90            | 0.0530                               | 0.00<br>42                          | 0.1884 | 0.01<br>42                          | 0.0257 | 0.00<br>08                           | 332                                 | 18<br>1 | 175                                 | 12 | 163  | 5 | 93   |
|          |         |          |                 |                                      |                                     |        |                                     |        |                                      |                                     |         |                                     |    |      |   |      |
| 117      | 22<br>1 | 41<br>0  | 0.54            | 0.0562                               | 0.00<br>44                          | 0.1988 | 0.01<br>42                          | 0.0264 | 0.00<br>09                           | 461                                 | 17<br>6 | 184                                 | 12 | 168  | 6 | 90   |
|          |         |          |                 |                                      |                                     |        |                                     |        |                                      |                                     |         |                                     |    |      |   |      |
| 56       | 19<br>0 | 45<br>0  | 0.42            | 0.0497                               | 0.00<br>38                          | 0.1810 | 0.01<br>34                          | 0.0265 | 0.00<br>09                           | 189                                 | 15<br>7 | 169                                 | 11 | 169  | 5 | 99   |
|          |         |          |                 |                                      |                                     |        |                                     |        |                                      |                                     |         |                                     |    |      |   |      |
| 43       | 24<br>1 | 45<br>0  | 0.54            | 0.0503                               | 0.00<br>26                          | 0.1866 | 0.00<br>95                          | 0.0269 | 0.00<br>08                           | 209                                 | 12<br>0 | 174                                 | 8  | 171  | 5 | 98   |
|          |         |          |                 |                                      |                                     |        |                                     |        |                                      |                                     |         |                                     |    |      |   |      |
| 27       | 23<br>1 | 28<br>6  | 0.81            | 0.0558                               | 0.00<br>39                          | 0.2047 | 0.01<br>32                          | 0.0271 | 0.00<br>09                           | 443                                 | 15<br>6 | 189                                 | 11 | 172  | 5 | 90   |
|          |         |          |                 |                                      |                                     |        |                                     |        |                                      |                                     |         |                                     |    |      |   |      |
| 17       | 52      | 90       | 0.57            | 0.0508                               | 0.00<br>69                          | 0.1793 | 0.02<br>02                          | 0.0274 | 0.00<br>12                           | 232                                 | 28<br>5 | 167                                 | 17 | 174  | 7 | 96   |
|          |         |          |                 |                                      |                                     |        |                                     |        |                                      |                                     |         |                                     |    |      |   |      |
| 16       | 48<br>2 | 10<br>29 | 0.47            | 0.0504                               | 0.00<br>23                          | 0.1911 | 0.00<br>83                          | 0.0274 | 0.00<br>08                           | 213                                 | 10<br>7 | 178                                 | 7  | 174  | 5 | 98   |
|          |         |          |                 |                                      |                                     |        |                                     |        |                                      |                                     |         |                                     |    |      |   |      |
| 88       | 26<br>0 | 47<br>2  | 0.55            | 0.0527                               | 0.00<br>27                          | 0.2002 | 0.00<br>98                          | 0.0275 | 0.00<br>08                           | 317                                 | 11<br>5 | 185                                 | 8  | 175  | 5 | 94   |
|          |         |          |                 |                                      |                                     |        |                                     |        |                                      |                                     |         |                                     |    |      |   |      |
| 3        | 11<br>1 | 17<br>4  | 0.64            | 0.0565                               | 0.00<br>52                          | 0.2079 | 0.01<br>77                          | 0.0275 | 0.00<br>09                           | 472                                 | 20<br>4 | 192                                 | 15 | 175  | 6 | 90   |
|          |         |          |                 |                                      |                                     |        |                                     |        |                                      |                                     |         |                                     |    |      |   |      |
| 113      | 32<br>0 | 29<br>8  | 1.07            | 0.0506                               | 0.00<br>34                          | 0.1917 | 0.01<br>23                          | 0.0277 | 0.00<br>09                           | 233                                 | 15<br>6 | 178                                 | 10 | 176  | 5 | 99   |
|          |         |          |                 |                                      |                                     |        |                                     |        |                                      |                                     |         |                                     |    |      |   |      |
| 26       | 54<br>1 | 82<br>4  | 0.66            | 0.0525                               | 0.00<br>26                          | 0.2030 | 0.00<br>98                          | 0.0278 | 0.00<br>08                           | 309                                 | 11<br>3 | 188                                 | 8  | 177  | 5 | 93   |
|          |         |          |                 |                                      |                                     |        |                                     |        |                                      |                                     |         |                                     |    |      |   |      |
| 32       | 21<br>1 | 62<br>1  | 0.34            | 0.0525                               | 0.00<br>25                          | 0.2040 | 0.00<br>95                          | 0.0279 | 0.00<br>08                           | 306                                 | 10<br>9 | 189                                 | 8  | 177  | 5 | 93   |
|          |         |          |                 |                                      |                                     |        |                                     |        |                                      |                                     |         |                                     |    |      |   |      |
| 62       | 28<br>1 | 76<br>9  | 0.37            | 0.0489                               | 0.00<br>23                          | 0.1882 | 0.00<br>82                          | 0.0280 | 0.00<br>08                           | 143                                 | 11<br>4 | 175                                 | 7  | 178  | 5 | 98   |
|          |         |          |                 |                                      |                                     |        |                                     |        |                                      |                                     |         |                                     |    |      |   |      |
| 57       | 14<br>9 | 29<br>0  | 0.51            | 0.0541                               | 0.00<br>38                          | 0.2086 | 0.01<br>45                          | 0.0281 | 0.00<br>09                           | 372                                 | 15<br>7 | 192                                 | 12 | 179  | 6 | 92   |
|          |         |          |                 |                                      |                                     |        |                                     |        |                                      |                                     |         |                                     |    |      |   |      |
| 14       | 35<br>1 | 51<br>9  | 0.68            | 0.0480                               | 0.00<br>26                          | 0.1846 | 0.00<br>97                          | 0.0282 | 0.00<br>08                           | 98.2                                | 12<br>2 | 172                                 | 8  | 179  | 5 | 95   |
|          |         |          |                 |                                      |                                     |        |                                     |        |                                      |                                     |         |                                     |    |      |   |      |
| 31       | 30<br>2 | 68<br>7  | 0.44            | 0.0517                               | 0.00<br>26                          | 0.2020 | 0.00<br>98                          | 0.0284 | 0.00<br>08                           | 272                                 | 11<br>5 | 187                                 | 8  | 180  | 5 | 96   |
|          |         |          |                 |                                      |                                     |        |                                     |        |                                      |                                     |         |                                     |    |      |   |      |
| 84       | 98      | 13<br>0  | 0.76            | 0.0505                               | 0.00<br>48                          | 0.1928 | 0.01<br>54                          | 0.0285 | 0.00<br>10                           | 217                                 | 21<br>7 | 179                                 | 13 | 181  | 6 | 98   |
|          |         |          |                 |                                      |                                     |        |                                     |        |                                      |                                     |         |                                     |    |      |   |      |

| Sp<br>ot | Th       | U        | Isotopic Ratios |                                      |                                     |        |                                     |        |                                      | Isotopic Ages (Ma)                  |         |                                     |    |      |   | Conc |
|----------|----------|----------|-----------------|--------------------------------------|-------------------------------------|--------|-------------------------------------|--------|--------------------------------------|-------------------------------------|---------|-------------------------------------|----|------|---|------|
|          | PP<br>m  | PP<br>m  | Th/<br>U        | <sup>207</sup> Pb/ <sup>206</sup> Pb | <sup>207</sup> Pb/ <sup>235</sup> U |        | <sup>206</sup> Pb/ <sup>238</sup> U |        | <sup>207</sup> Pb/ <sup>206</sup> Pb | <sup>207</sup> Pb/ <sup>235</sup> U |         | <sup>206</sup> Pb/ <sup>238</sup> U |    | Danc |   |      |
|          |          |          |                 |                                      | 1σ                                  | 1σ     | 1σ                                  | 1σ     |                                      | 1σ                                  | 1σ      |                                     |    |      |   |      |
|          |          |          |                 |                                      |                                     |        |                                     |        |                                      |                                     |         | 1σ                                  | 1σ |      |   |      |
| 115      | 16<br>4  | 28<br>7  | 0.57            | 0.0537                               | 0.00<br>38                          | 0.2125 | 0.01<br>43                          | 0.0286 | 0.00<br>09                           | 361                                 | 16<br>4 | 196                                 | 12 | 182  | 5 | 92   |
| 9        | 16<br>6  | 22<br>3  | 0.74            | 0.0552                               | 0.00<br>38                          | 0.2069 | 0.01<br>30                          | 0.0287 | 0.00<br>09                           | 420                                 | 15<br>4 | 191                                 | 11 | 182  | 6 | 95   |
|          | 20<br>8  | 40<br>5  |                 |                                      | 0.51                                |        | 0.0492                              |        | 0.00<br>30                           |                                     | 0.1936  |                                     |    |      |   |      |
| 96       | 54<br>2  | 13<br>2  | 0.41            | 0.0602                               | 0.00<br>76                          | 0.2195 | 0.02<br>27                          | 0.0289 | 0.00<br>13                           | 609                                 | 26<br>9 | 202                                 | 19 | 184  | 8 | 90   |
|          | 11<br>5  | 17<br>0  |                 |                                      | 0.68                                |        | 0.0503                              |        | 0.00<br>38                           |                                     | 0.2010  |                                     |    |      |   |      |
| 20       | 12<br>4  | 11<br>5  | 1.07            | 0.0570                               | 0.00<br>45                          | 0.2228 | 0.01<br>59                          | 0.0294 | 0.00<br>10                           | 500                                 | 17<br>6 | 204                                 | 13 | 187  | 6 | 91   |
|          | 68<br>3  | 11<br>3  |                 |                                      | 0.60                                |        | 0.0566                              |        | 0.00<br>62                           |                                     | 0.2197  |                                     |    |      |   |      |
| 76       | 23<br>3  | 14<br>75 | 0.16            | 0.0559                               | 0.00<br>27                          | 0.2260 | 0.01<br>02                          | 0.0295 | 0.00<br>09                           | 456                                 | 10<br>6 | 207                                 | 8  | 188  | 5 | 90   |
|          | 83<br>0  | 12<br>0  |                 |                                      | 0.69                                |        | 0.0541                              |        | 0.00<br>48                           |                                     | 0.2088  |                                     |    |      |   |      |
| 41       | 15<br>6  | 29<br>0  | 0.54            | 0.0542                               | 0.00<br>35                          | 0.2195 | 0.01<br>28                          | 0.0299 | 0.00<br>09                           | 389                                 | 14<br>4 | 201                                 | 11 | 190  | 6 | 94   |
|          | 105<br>2 | 16<br>5  |                 |                                      | 0.59                                |        | 0.0549                              |        | 0.00<br>43                           |                                     | 0.2256  |                                     |    |      |   |      |
| 81       | 82<br>9  | 17<br>9  | 0.46            | 0.0523                               | 0.00<br>38                          | 0.2191 | 0.01<br>49                          | 0.0303 | 0.00<br>09                           | 298                                 | 16<br>7 | 201                                 | 12 | 192  | 6 | 95   |
|          | 78<br>4  | 15<br>4  |                 |                                      | 0.64                                |        | 0.0507                              |        | 0.00<br>37                           |                                     | 0.2152  |                                     |    |      |   |      |
| 67       | 16<br>6  | 30<br>3  | 0.55            | 0.0490                               | 0.00<br>32                          | 0.1990 | 0.01<br>16                          | 0.0306 | 0.00<br>09                           | 150                                 | 14<br>4 | 184                                 | 10 | 194  | 6 | 94   |
|          | 80<br>6  | 12<br>6  |                 |                                      | 0.54                                |        | 0.0516                              |        | 0.00<br>39                           |                                     | 0.2168  |                                     |    |      |   |      |
| 8        | 10<br>1  | 23<br>6  | 0.43            | 0.0533                               | 0.00<br>40                          | 0.2187 | 0.01<br>55                          | 0.0311 | 0.00<br>10                           | 339                                 | 17<br>0 | 201                                 | 13 | 197  | 6 | 98   |
|          | 68<br>3  | 15<br>8  |                 |                                      | 0.55                                |        | 0.0577                              |        | 0.00<br>44                           |                                     | 0.2376  |                                     |    |      |   |      |
| 63       | 91       | 92       | 0.99            | 0.0530                               | 0.00<br>46                          | 0.2199 | 0.01<br>64                          | 0.0317 | 0.00<br>11                           | 328                                 | 20<br>0 | 202                                 | 14 | 201  | 7 | 99   |

| Sp<br>ot | Th      | U       | Isotopic Ratios |                                      |                                     |        |                                     |        |                                      | Isotopic Ages (Ma)                  |         |                                     |    |        |        | Conc |
|----------|---------|---------|-----------------|--------------------------------------|-------------------------------------|--------|-------------------------------------|--------|--------------------------------------|-------------------------------------|---------|-------------------------------------|----|--------|--------|------|
|          | PP<br>m | PP<br>m | Th/<br>U        | <sup>207</sup> Pb/ <sup>206</sup> Pb | <sup>207</sup> Pb/ <sup>235</sup> U |        | <sup>206</sup> Pb/ <sup>238</sup> U |        | <sup>207</sup> Pb/ <sup>206</sup> Pb | <sup>207</sup> Pb/ <sup>235</sup> U |         | <sup>206</sup> Pb/ <sup>238</sup> U |    | 1<br>σ | 1<br>σ |      |
|          |         |         |                 |                                      | 1σ                                  | 1σ     | 1σ                                  | 1σ     |                                      | 1σ                                  | 1σ      |                                     |    |        |        |      |
|          |         |         |                 |                                      |                                     |        |                                     |        |                                      |                                     |         |                                     |    |        |        |      |
| 15       | 17<br>6 | 35<br>7 | 0.49            | 0.0556                               | 0.00<br>30                          | 0.2432 | 0.01<br>31                          | 0.0319 | 0.00<br>10                           | 435                                 | 12<br>0 | 221                                 | 11 | 202    | 6      | 91   |
| 6        | 90      | 26<br>4 | 0.34            | 0.0527                               | 0.00<br>33                          | 0.2294 | 0.01<br>38                          | 0.0323 | 0.00<br>10                           | 322                                 | 14<br>3 | 210                                 | 11 | 205    | 6      | 97   |
| 101      | 95      | 26<br>8 | 0.35            | 0.0526                               | 0.00<br>35                          | 0.2340 | 0.01<br>37                          | 0.0324 | 0.00<br>10                           | 322                                 | 15<br>2 | 213                                 | 11 | 205    | 6      | 96   |
| 89       | 20<br>3 | 28<br>1 | 0.72            | 0.0569                               | 0.00<br>39                          | 0.2532 | 0.01<br>65                          | 0.0328 | 0.00<br>11                           | 487                                 | 15<br>2 | 229                                 | 13 | 208    | 7      | 90   |
| 111      | 15<br>2 | 34<br>7 | 0.44            | 0.0522                               | 0.00<br>28                          | 0.2380 | 0.01<br>24                          | 0.0329 | 0.00<br>10                           | 300                                 | 12<br>2 | 217                                 | 10 | 209    | 6      | 96   |
| 40       | 11<br>8 | 28<br>4 | 0.41            | 0.0477                               | 0.00<br>42                          | 0.2258 | 0.01<br>85                          | 0.0347 | 0.00<br>12                           | 83                                  | 19<br>6 | 207                                 | 15 | 220    | 7      | 93   |
| 77       | 74      | 33<br>0 | 0.23            | 0.0563                               | 0.00<br>32                          | 0.2726 | 0.01<br>53                          | 0.0350 | 0.00<br>10                           | 465                                 | 12<br>8 | 245                                 | 12 | 222    | 6      | 90   |
| 90       | 13<br>5 | 20<br>7 | 0.66            | 0.0559                               | 0.00<br>42                          | 0.2886 | 0.01<br>99                          | 0.0377 | 0.00<br>13                           | 456                                 | 16<br>7 | 257                                 | 16 | 239    | 8      | 92   |
| 36       | 14<br>0 | 23<br>6 | 0.59            | 0.0562                               | 0.00<br>43                          | 0.2922 | 0.02<br>12                          | 0.0381 | 0.00<br>12                           | 457                                 | 17<br>0 | 260                                 | 17 | 241    | 8      | 92   |
| 103      | 11<br>0 | 23<br>3 | 0.47            | 0.0550                               | 0.00<br>34                          | 0.3001 | 0.01<br>86                          | 0.0387 | 0.00<br>12                           | 413                                 | 10<br>6 | 266                                 | 15 | 245    | 8      | 91   |
| 24       | 63      | 94      | 0.67            | 0.0561                               | 0.00<br>44                          | 0.2892 | 0.01<br>92                          | 0.0396 | 0.00<br>14                           | 457                                 | 17<br>2 | 258                                 | 15 | 251    | 9      | 97   |
| 97       | 20<br>8 | 33<br>3 | 0.62            | 0.0572                               | 0.00<br>33                          | 0.3140 | 0.01<br>70                          | 0.0397 | 0.00<br>12                           | 502                                 | 13<br>2 | 277                                 | 13 | 251    | 7      | 90   |
| 75       | 13<br>6 | 21<br>7 | 0.63            | 0.0539                               | 0.00<br>34                          | 0.3044 | 0.01<br>84                          | 0.0413 | 0.00<br>12                           | 369                                 | 14<br>1 | 270                                 | 14 | 261    | 8      | 96   |
| 93       | 14<br>2 | 22<br>0 | 0.65            | 0.0589                               | 0.00<br>43                          | 0.3860 | 0.02<br>45                          | 0.0486 | 0.00<br>17                           | 561                                 | 16<br>4 | 331                                 | 18 | 306    | 10     | 91   |
| 100      | 57      | 20<br>3 | 0.28            | 0.0536                               | 0.00<br>37                          | 0.3687 | 0.02<br>45                          | 0.0496 | 0.00<br>16                           | 354                                 | 15<br>6 | 319                                 | 18 | 312    | 10     | 97   |
| 34       | 30<br>0 | 94<br>3 | 0.32            | 0.0615                               | 0.00<br>26                          | 0.5659 | 0.02<br>26                          | 0.0660 | 0.00<br>18                           | 657                                 | 89      | 455                                 | 15 | 412    | 11     | 90   |
| 42       | 42<br>5 | 59<br>4 | 0.72            | 0.0568                               | 0.00<br>30                          | 0.2137 | 0.01<br>05                          | 0.0275 | 0.00<br>08                           | 483                                 | 11<br>7 | 197                                 | 9  | 175    | 5      | 88   |
| 7        | 19<br>7 | 39<br>1 | 0.50            | 0.0563                               | 0.00<br>49                          | 0.1405 | 0.01<br>16                          | 0.0185 | 0.00<br>06                           | 465                                 | 19<br>7 | 133                                 | 10 | 118    | 4      | 88   |

| Spot | Th  | U    | Isotopic Ratios |                                      |                                     |        |                                     |        |                                      | Isotopic Ages (Ma)                  |     |                                     |    |      |     | Conc |
|------|-----|------|-----------------|--------------------------------------|-------------------------------------|--------|-------------------------------------|--------|--------------------------------------|-------------------------------------|-----|-------------------------------------|----|------|-----|------|
|      | ppm | ppm  | Th/<br>U        | <sup>207</sup> Pb/ <sup>206</sup> Pb | <sup>207</sup> Pb/ <sup>235</sup> U |        | <sup>206</sup> Pb/ <sup>238</sup> U |        | <sup>207</sup> Pb/ <sup>206</sup> Pb | <sup>207</sup> Pb/ <sup>235</sup> U |     | <sup>206</sup> Pb/ <sup>238</sup> U |    | Disc | e % |      |
|      |     |      |                 |                                      | 1σ                                  | 1σ     | 1σ                                  | 1σ     |                                      | 1σ                                  | 1σ  |                                     |    |      |     |      |
|      |     |      |                 |                                      |                                     |        |                                     |        |                                      |                                     |     |                                     |    |      |     |      |
| 39   | 93  | 207  | 0.45            | 0.0659                               | 0.0071                              | 0.1706 | 0.0158                              | 0.0206 | 0.0009                               | 803                                 | 224 | 160                                 | 14 | 132  | 6   | 80   |
| 83   | 68  | 114  | 0.60            | 0.1693                               | 0.0205                              | 0.3791 | 0.0371                              | 0.0190 | 0.0008                               | 2551                                | 204 | 326                                 | 27 | 122  | 5   | 8    |
| 120  | 317 | 337  | 0.94            | 0.0622                               | 0.0053                              | 0.1695 | 0.0138                              | 0.0198 | 0.0007                               | 680                                 | 183 | 159                                 | 12 | 126  | 4   | 77   |
| 92   | 104 | 220  | 0.47            | 0.0678                               | 0.0056                              | 0.2463 | 0.0172                              | 0.0274 | 0.0010                               | 861                                 | 173 | 224                                 | 14 | 174  | 6   | 75   |
| 10   | 73  | 144  | 0.51            | 0.0669                               | 0.0073                              | 0.2282 | 0.0239                              | 0.0248 | 0.0010                               | 835                                 | 232 | 209                                 | 20 | 158  | 6   | 72   |
| 72   | 347 | 564  | 0.62            | 0.0673                               | 0.0068                              | 0.1604 | 0.0169                              | 0.0172 | 0.0005                               | 848                                 | 205 | 151                                 | 15 | 110  | 3   | 68   |
| 13   | 132 | 429  | 0.31            | 0.0798                               | 0.0053                              | 0.3219 | 0.0199                              | 0.0301 | 0.0010                               | 1192                                | 131 | 283                                 | 15 | 191  | 6   | 61   |
| 118  | 243 | 354  | 0.69            | 0.0752                               | 0.0070                              | 0.1921 | 0.0171                              | 0.0189 | 0.0007                               | 1076                                | 187 | 178                                 | 15 | 121  | 4   | 61   |
| 19   | 29  | 49   | 0.60            | 0.0949                               | 0.0179                              | 0.1972 | 0.0269                              | 0.0188 | 0.0012                               | 1528                                | 367 | 183                                 | 23 | 120  | 7   | 58   |
| 91   | 21  | 405  | 0.52            | 0.0764                               | 0.0053                              | 0.1929 | 0.0124                              | 0.0184 | 0.0006                               | 1106                                | 139 | 179                                 | 11 | 118  | 4   | 58   |
| 59   | 188 | 366  | 0.52            | 0.0814                               | 0.0085                              | 0.2844 | 0.0264                              | 0.0261 | 0.0009                               | 1231                                | 211 | 254                                 | 21 | 166  | 6   | 57   |
| 114  | 45  | 88   | 0.52            | 0.0790                               | 0.0102                              | 0.2166 | 0.0248                              | 0.0203 | 0.0008                               | 1173                                | 259 | 199                                 | 21 | 130  | 5   | 57   |
| 85   | 94  | 191  | 0.49            | 0.0779                               | 0.0085                              | 0.2042 | 0.0211                              | 0.0191 | 0.0008                               | 1146                                | 212 | 189                                 | 18 | 122  | 5   | 57   |
| 107  | 243 | 425  | 0.57            | 0.0872                               | 0.0072                              | 0.3092 | 0.0238                              | 0.0258 | 0.0008                               | 1365                                | 159 | 274                                 | 18 | 164  | 5   | 50   |
| 38   | 100 | 81   | 1.23            | 0.1561                               | 0.0138                              | 0.4740 | 0.0421                              | 0.0222 | 0.0011                               | 2413                                | 156 | 394                                 | 29 | 142  | 7   | 5    |
| 98   | 183 | 472  | 0.39            | 0.1542                               | 0.0112                              | 0.4187 | 0.0282                              | 0.0198 | 0.0007                               | 2394                                | 129 | 355                                 | 20 | 127  | 4   | 5    |
| 110  | 688 | 1603 | 0.43            | 0.0882                               | 0.0059                              | 0.4005 | 0.0308                              | 0.0318 | 0.0010                               | 1387                                | 130 | 342                                 | 22 | 202  | 6   | 48   |
| 87   | 36  | 77   | 0.47            | 0.1007                               | 0.0211                              | 0.2313 | 0.0413                              | 0.0186 | 0.0012                               | 1639                                | 397 | 211                                 | 34 | 119  | 7   | 43   |

| Spot      | Th/U |     | Th/U | Isotopic Ratios                      |                                     |        |                                     |        |                                      | Isotopic Ages (Ma) |                                     |      |                                     |     |     | Concentration % |    |
|-----------|------|-----|------|--------------------------------------|-------------------------------------|--------|-------------------------------------|--------|--------------------------------------|--------------------|-------------------------------------|------|-------------------------------------|-----|-----|-----------------|----|
|           | ppm  | ppm |      | <sup>207</sup> Pb/ <sup>206</sup> Pb | <sup>207</sup> Pb/ <sup>235</sup> U |        | <sup>206</sup> Pb/ <sup>238</sup> U |        | <sup>207</sup> Pb/ <sup>206</sup> Pb |                    | <sup>207</sup> Pb/ <sup>235</sup> U |      | <sup>206</sup> Pb/ <sup>238</sup> U |     |     |                 |    |
|           |      |     |      |                                      | 1σ                                  | 1σ     | 1σ                                  | 1σ     | 1σ                                   | 1σ                 | 1σ                                  | 1σ   |                                     |     |     |                 |    |
|           |      |     |      |                                      |                                     |        |                                     |        |                                      |                    |                                     |      |                                     |     |     |                 |    |
| 69        | 81   | 397 | 0.20 | 0.1005                               | 0.0073                              | 0.4035 | 0.0268                              | 0.0296 | 0.0009                               | 1635               | 135                                 | 344  | 19                                  | 188 | 6   | 41              |    |
| 51        | 68   | 103 | 0.66 | 0.0926                               | 0.0141                              | 0.3201 | 0.0530                              | 0.0233 | 0.0012                               | 1480               | 294                                 | 282  | 41                                  | 149 | 8   | 38              |    |
| 64        | 179  | 255 | 0.70 | 0.5171                               | 0.0437                              | 3.2602 | 0.3645                              | 0.0446 | 0.0036                               | 4291               | 125                                 | 1472 | 87                                  | 281 | 22  | 36              |    |
| 99        | 31   | 61  | 0.50 | 0.6407                               | 0.0374                              | 5.0888 | 0.2780                              | 0.0594 | 0.0031                               | 4603               | 85                                  | 1834 | 46                                  | 372 | 19  | 33              |    |
| 112       | 105  | 120 | 0.87 | 0.1171                               | 0.0119                              | 0.3114 | 0.0258                              | 0.0204 | 0.0009                               | 1922               | 183                                 | 275  | 20                                  | 130 | 5   | 28              |    |
| 70        | 418  | 520 | 0.80 | 0.1214                               | 0.0088                              | 0.4544 | 0.0303                              | 0.0277 | 0.0009                               | 1976               | 130                                 | 380  | 21                                  | 176 | 6   | 26              |    |
| 30        | 71   | 117 | 0.61 | 0.1240                               | 0.0161                              | 0.3033 | 0.0308                              | 0.0194 | 0.0007                               | 2014               | 233                                 | 269  | 24                                  | 124 | 5   | 26              |    |
| 94        | 72   | 139 | 0.52 | 0.3585                               | 0.0213                              | 2.2481 | 0.1355                              | 0.0452 | 0.0017                               | 3744               | 91                                  | 1196 | 42                                  | 285 | 10  | 24              |    |
| 119       | 96   | 112 | 0.86 | 0.1437                               | 0.0135                              | 0.6146 | 0.0506                              | 0.0334 | 0.0013                               | 2273               | 162                                 | 486  | 32                                  | 212 | 8   | 21              |    |
| 82        | 63   | 150 | 0.42 | 0.1385                               | 0.0149                              | 0.3755 | 0.0348                              | 0.0211 | 0.0009                               | 2209               | 187                                 | 324  | 26                                  | 134 | 6   | 17              |    |
| 35        | 91   | 132 | 0.69 | 0.1587                               | 0.0175                              | 0.5426 | 0.0587                              | 0.0263 | 0.0010                               | 2442               | 187                                 | 440  | 39                                  | 167 | 6   | 10              |    |
| 116       | 184  | 271 | 0.68 | 0.1667                               | 0.0135                              | 0.4747 | 0.0416                              | 0.0206 | 0.0008                               | 2524               | 136                                 | 394  | 29                                  | 131 | 5   | 1               |    |
| 44        | 190  | 313 | 0.61 | 0.2131                               | 0.0317                              | 0.5793 | 0.0823                              | 0.0216 | 0.0010                               | 2929               | 243                                 | 464  | 53                                  | 138 | 6   | 9               |    |
| HL12 Kidn |      |     |      |                                      |                                     |        |                                     |        |                                      |                    |                                     |      |                                     |     |     |                 |    |
| 23        | 221  | 536 | 0.41 |                                      | 0.0068                              |        | 0.0171                              |        | 0.0009                               |                    | 263                                 |      | 123                                 | 15  | 109 | 6               | 87 |
| 39        | 90   | 249 | 0.36 | 0.0521                               | 0.0102                              | 0.1246 | 0.0252                              | 0.0179 | 0.0009                               | 290                | 5                                   | 119  | 23                                  | 114 | 6   | 95              |    |
| 24        | 152  | 295 | 0.51 | 0.0525                               | 0.0073                              | 0.1300 | 0.0194                              | 0.0182 | 0.0010                               | 308                | 0                                   | 124  | 17                                  | 116 | 6   | 93              |    |
| 40        | 159  | 303 | 0.52 | 0.0548                               | 0.0066                              | 0.1338 | 0.0173                              | 0.0182 | 0.0008                               | 403                | 1                                   | 127  | 15                                  | 116 | 5   | 90              |    |
| 6         | 133  | 244 | 0.55 | 0.0557                               | 0.0094                              | 0.1387 | 0.0247                              | 0.0188 | 0.0011                               | 441                | 7                                   | 132  | 22                                  | 120 | 7   | 90              |    |

| Sp<br>ot | Th      | U       | Th/<br>U | Isotopic Ratios                      |                                     |        |                                     |        |                                      | Isotopic Ages (Ma) |                                     |     |                                     |     |        | Conc<br>or-<br>Danc<br>e<br>% |
|----------|---------|---------|----------|--------------------------------------|-------------------------------------|--------|-------------------------------------|--------|--------------------------------------|--------------------|-------------------------------------|-----|-------------------------------------|-----|--------|-------------------------------|
|          | PP<br>m | PP<br>m |          | <sup>207</sup> Pb/ <sup>206</sup> Pb | <sup>207</sup> Pb/ <sup>235</sup> U |        | <sup>206</sup> Pb/ <sup>238</sup> U |        | <sup>207</sup> Pb/ <sup>206</sup> Pb |                    | <sup>207</sup> Pb/ <sup>235</sup> U |     | <sup>206</sup> Pb/ <sup>238</sup> U |     | 1<br>σ |                               |
|          |         |         |          |                                      | 1σ                                  | 1σ     | 1σ                                  | 1σ     | 1σ                                   | 1σ                 | 1σ                                  | 1σ  |                                     |     |        |                               |
|          |         |         |          |                                      |                                     |        |                                     |        |                                      |                    |                                     |     |                                     |     |        |                               |
| 16       | 12      | 27      | 0.45     |                                      | 0.01                                |        | 0.03                                |        | 0.00                                 |                    | 39                                  |     |                                     |     | 90     |                               |
|          | 5       | 7       |          | 0.0540                               | 12                                  | 0.1390 | 01                                  | 0.0188 | 11                                   | 371                | 9                                   | 132 | 27                                  | 120 |        | 7                             |
| 36       | 92      | 20      | 0.45     |                                      | 0.00                                |        | 0.01                                |        | 0.00                                 |                    | 27                                  |     |                                     |     | 96     |                               |
|          |         | 2       |          | 0.0522                               | 69                                  | 0.1308 | 87                                  | 0.0189 | 10                                   | 295                | 8                                   | 125 | 17                                  | 120 |        | 6                             |
| 49       | 49      | 10      | 0.48     |                                      | 0.00                                |        | 0.02                                |        | 0.00                                 |                    | 35                                  |     |                                     |     | 90     |                               |
|          |         | 3       |          | 0.0564                               | 96                                  | 0.1398 | 57                                  | 0.0189 | 13                                   | 466                | 2                                   | 133 | 23                                  | 121 |        | 8                             |
| 46       | 22      | 70      | 0.31     |                                      | 0.01                                |        | 0.03                                |        | 0.00                                 |                    | 50                                  |     |                                     |     | 93     |                               |
|          |         |         |          | 0.0561                               | 52                                  | 0.1353 | 87                                  | 0.0190 | 18                                   | 455                | 6                                   | 129 | 35                                  | 121 |        | 11                            |
| 31       | 13      | 24      | 0.55     |                                      | 0.00                                |        | 0.02                                |        | 0.00                                 |                    | 34                                  |     |                                     |     | 90     |                               |
|          | 1       | 0       |          | 0.0533                               | 91                                  | 0.1423 | 59                                  | 0.0193 | 12                                   | 343                | 7                                   | 135 | 23                                  | 123 |        | 8                             |
| 15       | 99      | 21      | 0.46     |                                      | 0.00                                |        | 0.02                                |        | 0.00                                 |                    | 32                                  |     |                                     |     | 91     |                               |
|          |         | 5       |          | 0.0543                               | 87                                  | 0.1428 | 40                                  | 0.0195 | 10                                   | 382                | 7                                   | 136 | 21                                  | 124 |        | 6                             |
| 37       | 63      | 14      | 0.44     |                                      | 0.00                                |        | 0.02                                |        | 0.00                                 |                    | 28                                  |     |                                     |     | 93     |                               |
|          |         | 2       |          | 0.0536                               | 72                                  | 0.1406 | 02                                  | 0.0196 | 10                                   | 356                | 7                                   | 134 | 18                                  | 125 |        | 6                             |
| 26       | 63      | 16      | 0.38     |                                      | 0.01                                |        | 0.03                                |        | 0.00                                 |                    | 42                                  |     |                                     |     | 90     |                               |
|          |         | 6       |          | 0.0541                               | 24                                  | 0.1453 | 47                                  | 0.0196 | 14                                   | 376                | 9                                   | 138 | 31                                  | 125 |        | 9                             |
| 7        | 12      | 33      | 0.38     |                                      | 0.00                                |        | 0.01                                |        | 0.00                                 |                    | 21                                  |     |                                     |     | 93     |                               |
|          | 9       | 5       |          | 0.0522                               | 51                                  | 0.1433 | 54                                  | 0.0199 | 09                                   | 292                | 5                                   | 136 | 14                                  | 127 |        | 5                             |
| 17       | 10      | 19      | 0.52     |                                      | 0.00                                |        | 0.01                                |        | 0.00                                 |                    | 25                                  |     |                                     |     | 94     |                               |
|          | 3       | 7       |          | 0.0552                               | 65                                  | 0.1404 | 82                                  | 0.0199 | 11                                   | 420                | 4                                   | 133 | 16                                  | 127 |        | 7                             |
| 11       | 73      | 16      | 0.44     |                                      | 0.00                                |        | 0.02                                |        | 0.00                                 |                    | 30                                  |     |                                     |     | 94     |                               |
|          |         | 3       |          | 0.0523                               | 77                                  | 0.1463 | 29                                  | 0.0205 | 11                                   | 298                | 2                                   | 139 | 20                                  | 131 |        | 7                             |
| 13       | 16      | 26      | 0.63     |                                      | 0.00                                |        | 0.02                                |        | 0.00                                 |                    | 29                                  |     |                                     |     | 90     |                               |
|          | 8       | 5       |          | 0.0549                               | 75                                  | 0.1520 | 25                                  | 0.0205 | 12                                   | 408                | 1                                   | 144 | 20                                  | 131 |        | 7                             |
| 12       | 86      | 18      | 0.47     |                                      | 0.00                                |        | 0.01                                |        | 0.00                                 |                    | 25                                  |     |                                     |     | 93     |                               |
|          |         | 3       |          | 0.0456                               | 62                                  | 0.1305 | 88                                  | 0.0209 | 10                                   | -22                | 3                                   | 125 | 17                                  | 133 |        | 6                             |
| 28       | 72      | 15      | 0.47     |                                      | 0.00                                |        | 0.02                                |        | 0.00                                 |                    | 30                                  |     |                                     |     | 91     |                               |
|          |         | 3       |          | 0.0573                               | 83                                  | 0.1658 | 65                                  | 0.0225 | 15                                   | 501                | 8                                   | 156 | 23                                  | 144 |        | 9                             |
| 3        | 77      | 19      | 0.39     |                                      | 0.00                                |        | 0.05                                |        | 0.00                                 |                    | 32                                  |     |                                     |     | 90     |                               |
|          |         | 8       |          | 0.0580                               | 90                                  | 0.3140 | 29                                  | 0.0398 | 26                                   | 528                | 9                                   | 277 | 41                                  | 251 |        | 16                            |
| 30       | 17      | 31      | 0.56     |                                      | 0.00                                |        | 0.05                                |        | 0.00                                 |                    | 16                                  |     |                                     |     | 94     |                               |
|          | 7       | 6       |          | 0.0592                               | 46                                  | 0.5864 | 01                                  | 0.0714 | 26                                   | 574                | 4                                   | 469 | 32                                  | 444 |        | 16                            |
| 25       | 10      | 18      | 0.58     |                                      | 0.00                                |        | 0.05                                |        | 0.00                                 |                    | 15                                  |     |                                     |     | 92     |                               |
|          | 4       | 0       |          | 0.0615                               | 44                                  | 0.6403 | 34                                  | 0.0752 | 32                                   | 658                | 0                                   | 502 | 33                                  | 468 |        | 19                            |
| 5        | 18      | 23      | 0.81     |                                      | 0.00                                |        | 0.04                                |        | 0.00                                 |                    | 15                                  |     |                                     |     | 98     |                               |
|          | 8       | 1       |          | 0.0577                               | 41                                  | 0.6116 | 84                                  | 0.0768 | 27                                   | 519                | 2                                   | 485 | 31                                  | 477 |        | 16                            |

| Sp<br>ot | Th      | U       | Isotopic Ratios |                                  |                                 |                 |                                 |                 |                                  | Isotopic Ages (Ma)              |                |                                 |    |        | Conc   |      |
|----------|---------|---------|-----------------|----------------------------------|---------------------------------|-----------------|---------------------------------|-----------------|----------------------------------|---------------------------------|----------------|---------------------------------|----|--------|--------|------|
|          | PP<br>m | PP<br>m | Th/<br>U        | <sup>207</sup> Pb/ <sup>20</sup> | <sup>207</sup> Pb/ <sup>2</sup> |                 | <sup>206</sup> Pb/ <sup>2</sup> |                 | <sup>207</sup> Pb/ <sup>20</sup> | <sup>207</sup> Pb/ <sup>2</sup> |                | <sup>206</sup> Pb/ <sup>2</sup> |    | 1<br>σ | 1<br>σ | Danc |
|          |         |         |                 | <sup>6</sup> Pb                  | <sup>35</sup> U                 | <sup>38</sup> U | <sup>1</sup> σ                  | <sup>6</sup> Pb | <sup>35</sup> U                  | <sup>38</sup> U                 | <sup>1</sup> σ |                                 |    |        |        |      |
|          |         |         |                 | 1σ                               | 1σ                              | 1σ              | 1σ                              | 1σ              | 1σ                               | 1σ                              | 1σ             |                                 |    |        |        |      |
| 32       | 20      | 31      | 0.64            |                                  | 0.00                            |                 | 0.04                            |                 | 0.00                             |                                 | 12             |                                 |    |        |        | 98   |
|          | 3       | 7       |                 | 0.0574                           | 34                              | 0.6367          | 30                              | 0.0798          | 27                               | 508                             | 6              | 500                             | 27 | 495    | 16     |      |
| 41       | 15      | 24      | 0.62            |                                  | 0.00                            |                 | 0.04                            |                 | 0.00                             |                                 | 13             |                                 |    |        |        | 94   |
|          | 1       | 4       |                 | 0.0607                           | 39                              | 0.6730          | 95                              | 0.0801          | 29                               | 630                             | 6              | 523                             | 30 | 497    | 17     |      |
| 1        | 18      | 30      | 0.61            |                                  | 0.00                            |                 | 0.03                            |                 | 0.00                             |                                 | 10             |                                 |    |        |        | 95   |
|          | 6       | 5       |                 | 0.0538                           | 26                              | 0.6026          | 51                              | 0.0810          | 27                               | 361                             | 5              | 479                             | 22 | 502    | 16     |      |
| 4        | 79      | 30      | 0.26            |                                  | 0.00                            |                 | 0.05                            |                 | 0.00                             |                                 | 14             |                                 |    |        |        | 90   |
|          |         | 2       |                 | 0.0644                           | 47                              | 0.7226          | 84                              | 0.0811          | 29                               | 754                             | 9              | 552                             | 34 | 503    | 18     |      |
| 27       | 83      | 92      | 0.09            |                                  | 0.00                            |                 | 0.03                            |                 | 0.00                             |                                 |                |                                 |    |        |        | 98   |
|          |         | 7       |                 | 0.0579                           | 26                              | 0.6619          | 70                              | 0.0823          | 27                               | 525                             | 97             | 516                             | 23 | 510    | 16     |      |
| 14       | 12      | 13      | 0.89            |                                  | 0.00                            |                 | 0.05                            |                 | 0.00                             |                                 | 17             |                                 |    |        |        | 92   |
|          | 4       | 9       |                 | 0.0531                           | 43                              | 0.6198          | 56                              | 0.0852          | 33                               | 334                             | 8              | 490                             | 35 | 527    | 20     |      |
| 42       | 40      | 19      | 0.20            |                                  | 0.00                            |                 | 0.08                            |                 | 0.00                             |                                 | 12             |                                 |    |        |        | 95   |
|          |         | 9       |                 | 0.0666                           | 40                              | 1.0370          | 72                              | 0.1128          | 66                               | 824                             | 4              | 722                             | 43 | 689    | 38     |      |
| 2        | 11      | 23      | 0.48            |                                  | 0.02                            |                 | 0.06                            |                 | 0.00                             |                                 | 71             |                                 |    |        |        | 15   |
|          | 3       | 6       |                 | 0.0623                           | 44                              | 0.1531          | 69                              | 0.0178          | 15                               | 684                             | 3              | 145                             | 59 | 114    | 10     |      |
| 8        | 12      | 26      | 0.48            |                                  | 0.01                            |                 | 0.02                            |                 | 0.00                             |                                 | 38             |                                 |    |        |        | 84   |
|          | 9       | 8       |                 | 0.0593                           | 05                              | 0.1580          | 99                              | 0.0200          | 14                               | 578                             | 2              | 149                             | 26 | 127    | 9      |      |
| 9        | 51      | 14      | 0.36            |                                  | 0.01                            |                 | 0.04                            |                 | 0.00                             |                                 | 49             |                                 |    |        |        | 32   |
|          |         | 3       |                 | 0.0586                           | 54                              | 0.1556          | 50                              | 0.0193          | 11                               | 552                             | 2              | 147                             | 40 | 123    | 7      |      |
| 10       | 46      | 20      | 0.23            |                                  | 0.02                            |                 | 0.07                            |                 | 0.00                             |                                 | 66             |                                 |    |        |        | 5    |
|          |         | 2       |                 | 0.0831                           | 69                              | 0.2134          | 86                              | 0.0186          | 14                               | 1271                            | 1              | 196                             | 66 | 119    | 9      |      |
| 18       | 12      | 28      | 0.44            |                                  | 0.01                            |                 | 0.05                            |                 | 0.00                             |                                 | 55             |                                 |    |        |        | 35   |
|          | 4       | 4       |                 | 0.0658                           | 87                              | 0.1628          | 33                              | 0.0180          | 16                               | 800                             | 0              | 153                             | 47 | 115    | 10     |      |
| 19       | 10      | 23      | 0.43            |                                  | 0.01                            |                 | 0.04                            |                 | 0.00                             |                                 | 46             |                                 |    |        |        | 51   |
|          | 0       | 4       |                 | 0.0556                           | 45                              | 0.1436          | 15                              | 0.0187          | 11                               | 436                             | 9              | 136                             | 37 | 120    | 7      |      |
| 20       | 25      | 70      | 0.36            |                                  | 0.01                            |                 | 0.02                            |                 | 0.00                             |                                 | 37             |                                 |    |        |        | 57   |
|          | 5       | 5       |                 | 0.0585                           | 02                              | 0.1339          | 66                              | 0.0166          | 08                               | 550                             | 2              | 128                             | 24 | 106    | 5      |      |
| 21       | 12      | 48      | 0.26            |                                  | 0.01                            |                 | 0.04                            |                 | 0.00                             |                                 | 50             |                                 |    |        |        | 44   |
|          | 5       | 8       |                 | 0.0611                           | 60                              | 0.1531          | 42                              | 0.0182          | 11                               | 642                             | 4              | 145                             | 39 | 116    | 7      |      |
| 22       | 22      | 36      | 0.62            |                                  | 0.04                            |                 | 0.13                            |                 | 0.00                             |                                 | 10             |                                 | 10 |        |        | 27   |
|          | 7       | 4       |                 | 0.0978                           | 92                              | 0.2354          | 16                              | 0.0175          | 16                               | 1583                            | 37             | 215                             | 8  | 112    | 10     |      |
| 29       | 13      | 28      | 0.49            |                                  | 0.01                            |                 | 0.04                            |                 | 0.00                             |                                 | 46             |                                 |    |        |        | 43   |
|          | 8       | 1       |                 | 0.0674                           | 51                              | 0.1802          | 50                              | 0.0194          | 11                               | 849                             | 5              | 168                             | 39 | 124    | 7      |      |
| 33       | 95      | 20      | 0.47            |                                  | 0.01                            |                 | 0.04                            |                 | 0.00                             |                                 | 53             |                                 |    |        |        | 34   |
|          |         | 3       |                 | 0.0541                           | 74                              | 0.1274          | 47                              | 0.0171          | 11                               | 373                             | 9              | 122                             | 40 | 109    | 7      |      |



| Sp<br>ot | Th  | U   | Th/<br>U | Isotopic Ratios                      |                                     |                |                                     |                |                                      | Isotopic Ages (Ma) |                                     |     |                                     |     |                | Conc<br>or-<br>Danc<br>e<br>% |
|----------|-----|-----|----------|--------------------------------------|-------------------------------------|----------------|-------------------------------------|----------------|--------------------------------------|--------------------|-------------------------------------|-----|-------------------------------------|-----|----------------|-------------------------------|
|          | ppm | ppm |          | <sup>207</sup> Pb/ <sup>206</sup> Pb | <sup>207</sup> Pb/ <sup>235</sup> U |                | <sup>206</sup> Pb/ <sup>238</sup> U |                | <sup>207</sup> Pb/ <sup>206</sup> Pb |                    | <sup>207</sup> Pb/ <sup>235</sup> U |     | <sup>206</sup> Pb/ <sup>238</sup> U |     | <sup>1</sup> σ |                               |
|          |     |     |          |                                      | <sup>1</sup> σ                      | <sup>1</sup> σ | <sup>1</sup> σ                      | <sup>1</sup> σ | <sup>1</sup> σ                       | <sup>1</sup> σ     | <sup>1</sup> σ                      |     |                                     |     |                |                               |
|          |     |     |          |                                      |                                     |                |                                     |                |                                      |                    |                                     |     |                                     |     |                |                               |
| 34       | 79  | 186 | 0.43     | 0.0705                               | 0.0206                              | 0.1808         | 62                                  | 0.0194         | 21                                   | 942                | 4                                   | 169 | 48                                  | 124 | 13             | 69                            |
| 35       | 15  | 28  | 0.54     |                                      | 0.01                                |                | 0.02                                |                | 0.00                                 |                    | 38                                  |     |                                     |     |                | 80                            |
|          | 4   | 6   |          | 0.0605                               | 07                                  | 0.1501         | 82                                  | 0.0182         | 12                                   | 621                | 2                                   | 142 | 25                                  | 116 | 7              |                               |
| 38       | 22  | 35  | 0.63     |                                      | 0.02                                |                | 0.05                                |                | 0.00                                 |                    | 67                                  |     |                                     |     |                | 10                            |
|          | 4   | 4   |          | 0.0507                               | 21                                  | 0.1131         | 42                                  | 0.0162         | 13                                   | 227                | 0                                   | 109 | 49                                  | 103 | 8              |                               |
| 43       | 21  | 35  | 0.60     |                                      | 0.01                                |                | 0.04                                |                | 0.00                                 |                    | 41                                  |     |                                     |     |                | 54                            |
|          | 0   | 3   |          | 0.0781                               | 54                                  | 0.2003         | 51                                  | 0.0184         | 20                                   | 1149               | 7                                   | 185 | 38                                  | 117 | 13             |                               |
| 44       | 12  | 23  | 0.52     |                                      | 0.01                                |                | 0.03                                |                | 0.00                                 |                    | 35                                  |     |                                     |     |                | 55                            |
|          | 3   | 7   |          | 0.0798                               | 38                                  | 0.2022         | 74                                  | 0.0187         | 12                                   | 1191               | 7                                   | 187 | 32                                  | 119 | 8              |                               |
| 45       | 60  | 12  | 0.49     |                                      | 0.01                                |                | 0.04                                |                | 0.00                                 |                    | 51                                  |     |                                     |     |                | 36                            |
|          |     | 2   |          | 0.0556                               | 66                                  | 0.1305         | 46                                  | 0.0170         | 13                                   | 435                | 9                                   | 125 | 40                                  | 109 | 8              |                               |
| 47       | 11  | 22  | 0.50     |                                      | 0.02                                |                | 0.06                                |                | 0.00                                 |                    | 74                                  |     |                                     |     |                | 27                            |
|          | 3   | 3   |          | 0.0602                               | 60                                  | 0.1296         | 34                                  | 0.0156         | 17                                   | 610                | 8                                   | 124 | 57                                  | 100 | 11             |                               |
| 48       | 16  | 28  | 0.56     |                                      | 0.01                                |                | 0.04                                |                | 0.00                                 |                    | 49                                  |     |                                     |     |                | 37                            |
|          | 1   | 6   |          | 0.0479                               | 60                                  | 0.1149         | 19                                  | 0.0174         | 11                                   | 94                 | 9                                   | 110 | 38                                  | 111 | 7              |                               |
| 50       | 10  | 18  | 0.58     |                                      | 0.04                                |                | 0.12                                |                | 0.00                                 |                    | 11                                  |     | 11                                  |     |                | 15                            |
|          | 4   | 1   |          | 0.0646                               | 97                                  | 0.1500         | 40                                  | 0.0169         | 17                                   | 760                | 62                                  | 142 | 0                                   | 108 | 11             |                               |
| HL13     |     |     |          | Kidn                                 |                                     |                |                                     |                |                                      |                    |                                     |     |                                     |     |                |                               |
| 18       | 18  | 26  | 0.71     |                                      | 0.00                                |                | 0.01                                |                | 0.00                                 |                    | 24                                  |     |                                     |     |                | 96                            |
|          | 5   | 1   |          | 0.0511                               | 56                                  | 0.1177         | 43                                  | 0.0170         | 09                                   | 246                | 0                                   | 113 | 13                                  | 109 | 5              |                               |
| 11       | 58  | 17  | 0.34     |                                      | 0.00                                |                | 0.01                                |                | 0.00                                 |                    | 31                                  |     |                                     |     |                | 91                            |
|          |     | 3   |          | 0.0489                               | 80                                  | 0.1043         | 82                                  | 0.0172         | 10                                   | 144                | 1                                   | 101 | 17                                  | 110 | 6              |                               |
| 13       | 57  | 15  | 0.38     |                                      | 0.00                                |                | 0.01                                |                | 0.00                                 |                    | 29                                  |     |                                     |     |                | 92                            |
|          |     | 0   |          | 0.0560                               | 79                                  | 0.1268         | 92                                  | 0.0176         | 10                                   | 453                | 8                                   | 121 | 17                                  | 113 | 6              |                               |
| 17       | 11  | 23  | 0.48     |                                      | 0.00                                |                | 0.01                                |                | 0.00                                 |                    | 24                                  |     |                                     |     |                | 92                            |
|          | 1   | 2   |          | 0.0540                               | 61                                  | 0.1292         | 58                                  | 0.0179         | 08                                   | 372                | 6                                   | 123 | 14                                  | 114 | 5              |                               |
| 42       | 10  | 26  | 0.42     |                                      | 0.00                                |                | 0.01                                |                | 0.00                                 |                    | 23                                  |     |                                     |     |                | 95                            |
|          | 9   | 2   |          | 0.0517                               | 56                                  | 0.1243         | 46                                  | 0.0179         | 08                                   | 271                | 5                                   | 119 | 13                                  | 114 | 5              |                               |
| 35       | 69  | 24  | 0.28     |                                      | 0.00                                |                | 0.01                                |                | 0.00                                 |                    | 25                                  |     |                                     |     |                | 92                            |
|          |     | 5   |          | 0.0523                               | 63                                  | 0.1297         | 69                                  | 0.0179         | 09                                   | 298                | 8                                   | 124 | 15                                  | 114 | 6              |                               |
| 5        | 16  | 26  | 0.62     |                                      | 0.01                                |                | 0.02                                |                | 0.00                                 |                    | 37                                  |     |                                     |     |                | 86                            |
|          | 4   | 5   |          | 0.0570                               | 05                                  | 0.1399         | 77                                  | 0.0181         | 13                                   | 492                | 5                                   | 133 | 25                                  | 116 | 8              |                               |
| 29       | 21  | 33  | 0.63     |                                      | 0.00                                |                | 0.02                                |                | 0.00                                 |                    | 31                                  |     |                                     |     |                | 90                            |
|          | 4   | 9   |          | 0.0539                               | 78                                  | 0.1346         | 06                                  | 0.0183         | 09                                   | 369                | 4                                   | 128 | 18                                  | 117 | 6              |                               |
| 22       | 12  | 24  | 0.54     |                                      | 0.00                                |                | 0.01                                |                | 0.00                                 |                    | 25                                  |     |                                     |     |                | 90                            |
|          | 9   | 0   |          | 0.0551                               | 64                                  | 0.1352         | 72                                  | 0.0183         | 09                                   | 417                | 7                                   | 129 | 15                                  | 117 | 6              |                               |

| Sp<br>ot | Th      | U       | Th/<br>U | Isotopic Ratios                      |                                     |    |                                     |    |                                      | Isotopic Ages (Ma) |                                     |    |                                     |  |        | Conc<br>or-<br>Danc<br>e<br>% |
|----------|---------|---------|----------|--------------------------------------|-------------------------------------|----|-------------------------------------|----|--------------------------------------|--------------------|-------------------------------------|----|-------------------------------------|--|--------|-------------------------------|
|          | PP<br>m | PP<br>m |          | <sup>207</sup> Pb/ <sup>206</sup> Pb | <sup>207</sup> Pb/ <sup>235</sup> U |    | <sup>206</sup> Pb/ <sup>238</sup> U |    | <sup>207</sup> Pb/ <sup>206</sup> Pb |                    | <sup>207</sup> Pb/ <sup>235</sup> U |    | <sup>206</sup> Pb/ <sup>238</sup> U |  | 1<br>σ |                               |
|          |         |         |          |                                      | 1σ                                  | 1σ | 1σ                                  | 1σ | 1σ                                   | 1σ                 | 1σ                                  | 1σ |                                     |  |        |                               |
|          |         |         |          |                                      |                                     |    |                                     |    |                                      |                    |                                     |    |                                     |  |        |                               |
| 30       | 11<br>2 | 21<br>9 | 0.51     |                                      | 0.00<br>61                          |    | 0.01<br>64                          |    | 0.00<br>09                           |                    | 25<br>279                           |    |                                     |  | 95     |                               |
| 6        | 11<br>1 | 25<br>4 | 0.43     |                                      | 0.00<br>0.0542                      |    | 0.01<br>97                          |    | 0.00<br>0.0186                       |                    | 27<br>377                           |    |                                     |  | 90     |                               |
|          |         |         |          |                                      |                                     |    |                                     |    |                                      |                    |                                     |    |                                     |  |        |                               |
| 41       | 43      | 11<br>6 | 0.37     |                                      | 0.00<br>0.0559                      |    | 0.02<br>51                          |    | 0.00<br>0.0189                       |                    | 36<br>449                           |    |                                     |  | 95     |                               |
| 21       | 72      | 17<br>3 | 0.42     |                                      | 0.00<br>0.0512                      |    | 0.01<br>88                          |    | 0.00<br>0.0190                       |                    | 29<br>250                           |    |                                     |  | 98     |                               |
| 49       | 10<br>3 | 23<br>4 | 0.44     |                                      | 0.00<br>0.0547                      |    | 0.01<br>85                          |    | 0.00<br>0.0193                       |                    | 27<br>400                           |    |                                     |  | 91     |                               |
| 27       | 38      | 13<br>0 | 0.29     |                                      | 0.00<br>0.0493                      |    | 0.02<br>39                          |    | 0.00<br>0.0195                       |                    | 31<br>163                           |    |                                     |  | 96     |                               |
| 36       | 74      | 16<br>3 | 0.45     |                                      | 0.00<br>0.0548                      |    | 0.02<br>23                          |    | 0.00<br>0.0196                       |                    | 32<br>404                           |    |                                     |  | 92     |                               |
| 23       | 20      | 61      | 0.34     |                                      | 0.02<br>0.0482                      |    | 0.06<br>06                          |    | 0.00<br>0.0205                       |                    | 70<br>111                           |    |                                     |  | 96     |                               |
| 37       | 66      | 19<br>5 | 0.34     |                                      | 0.00<br>0.0558                      |    | 0.03<br>55                          |    | 0.00<br>0.0332                       |                    | 28<br>446                           |    |                                     |  | 90     |                               |
| 38       | 82      | 29<br>1 | 0.28     |                                      | 0.00<br>0.0504                      |    | 0.02<br>74                          |    | 0.00<br>0.0439                       |                    | 18<br>214                           |    |                                     |  | 97     |                               |
| 46       | 11<br>4 | 44      | 2.62     |                                      | 0.00<br>0.0497                      |    | 0.04<br>48                          |    | 0.00<br>0.0458                       |                    | 28<br>182                           |    |                                     |  | 90     |                               |
| 1        | 16<br>9 | 26<br>4 | 0.64     |                                      | 0.00<br>0.0590                      |    | 0.04<br>72                          |    | 0.00<br>0.0843                       |                    | 12<br>568                           |    |                                     |  | 98     |                               |
| 2        | 10<br>9 | 40<br>7 | 0.27     |                                      | 0.00<br>0.0579                      |    | 0.04<br>21                          |    | 0.00<br>0.0690                       |                    | 14<br>528                           |    |                                     |  | 95     |                               |
| 3        | 40<br>6 | 48<br>0 | 0.85     |                                      | 0.00<br>0.0628                      |    | 0.04<br>13                          |    | 0.00<br>0.0733                       |                    | 11<br>700                           |    |                                     |  | 90     |                               |
| 8        | 25<br>2 | 22<br>0 | 1.15     |                                      | 0.00<br>0.0498                      |    | 0.03<br>79                          |    | 0.00<br>0.0730                       |                    | 14<br>186                           |    |                                     |  | 90     |                               |
| 14       | 43      | 57      | 0.77     |                                      | 0.00<br>0.0480                      |    | 0.05<br>51                          |    | 0.00<br>0.0644                       |                    | 24<br>101                           |    |                                     |  | 90     |                               |
| 15       | 20<br>9 | 29<br>5 | 0.71     |                                      | 0.01<br>0.0613                      |    | 0.11<br>75                          |    | 0.00<br>0.0770                       |                    | 35<br>651                           |    |                                     |  | 90     |                               |
| 16       | 98      | 11<br>3 | 0.87     |                                      | 0.00<br>0.0639                      |    | 0.05<br>71                          |    | 0.00<br>0.0772                       |                    | 14<br>739                           |    |                                     |  | 91     |                               |

| Sp<br>ot | Th      | U       | Isotopic Ratios |                                  |                                 |                 |                                 |                 |                                  | Isotopic Ages (Ma)              |        |                                 |        |        |        | Conc<br>or-<br>Danc<br>e |
|----------|---------|---------|-----------------|----------------------------------|---------------------------------|-----------------|---------------------------------|-----------------|----------------------------------|---------------------------------|--------|---------------------------------|--------|--------|--------|--------------------------|
|          | PP<br>m | PP<br>m | Th/<br>U        | <sup>207</sup> Pb/ <sup>20</sup> | <sup>207</sup> Pb/ <sup>2</sup> |                 | <sup>206</sup> Pb/ <sup>2</sup> |                 | <sup>207</sup> Pb/ <sup>20</sup> | <sup>207</sup> Pb/ <sup>2</sup> |        | <sup>206</sup> Pb/ <sup>2</sup> |        | 1<br>σ | 1<br>σ | %                        |
|          |         |         |                 | <sup>6</sup> Pb                  | <sup>35</sup> U                 | <sup>38</sup> U | 1σ                              | <sup>6</sup> Pb | 1σ                               | <sup>35</sup> U                 | 1<br>σ | <sup>38</sup> U                 | 1<br>σ |        |        |                          |
|          |         |         |                 | 1σ                               | 1σ                              | 1σ              | 1σ                              | 1σ              | 1σ                               | 1σ                              | 1σ     | 1σ                              |        |        |        |                          |
| 20       | 31      | 46      | 0.66            |                                  | 0.00                            |                 | 0.04                            |                 | 0.00                             |                                 | 13     |                                 |        |        |        | 94                       |
|          | 1       | 9       |                 | 0.0524                           | 30                              | 0.5842          | 10                              | 0.0798          | 32                               | 303                             | 1      | 467                             | 26     | 495    | 19     |                          |
| 28       | 22      | 31      | 0.72            |                                  | 0.00                            |                 | 0.04                            |                 | 0.00                             |                                 | 12     |                                 |        |        |        | 99                       |
|          | 5       | 2       |                 | 0.0571                           | 34                              | 0.6466          | 39                              | 0.0815          | 28                               | 494                             | 9      | 506                             | 27     | 505    | 17     |                          |
| 33       | 47      | 39      | 1.21            |                                  | 0.00                            |                 | 0.08                            |                 | 0.00                             |                                 | 27     |                                 |        |        |        | 99                       |
|          |         |         |                 | 0.0581                           | 73                              | 0.6619          | 84                              | 0.0838          | 39                               | 534                             | 4      | 516                             | 54     | 519    | 23     |                          |
| 34       | 22      | 38      | 0.57            |                                  | 0.00                            |                 | 0.04                            |                 | 0.00                             |                                 | 12     |                                 |        |        |        | 97                       |
|          | 2       | 9       |                 | 0.0588                           | 33                              | 0.6706          | 44                              | 0.0820          | 28                               | 560                             | 3      | 521                             | 27     | 508    | 17     |                          |
| 39       | 10      |         | 0.85            |                                  | 0.00                            |                 | 0.06                            |                 | 0.00                             |                                 | 18     |                                 |        |        |        | 90                       |
|          | 89      | 5       |                 | 0.0633                           | 56                              | 0.6164          | 05                              | 0.0709          | 29                               | 717                             | 9      | 488                             | 38     | 441    | 18     |                          |
| 40       | 12      | 26      | 0.45            |                                  | 0.00                            |                 | 0.05                            |                 | 0.00                             |                                 | 15     |                                 |        |        |        | 90                       |
|          | 2       | 9       |                 | 0.0632                           | 45                              | 0.6695          | 36                              | 0.0764          | 28                               | 716                             | 1      | 520                             | 33     | 475    | 17     |                          |
| 43       | 24      | 33      | 0.75            |                                  | 0.00                            |                 | 0.04                            |                 | 0.00                             |                                 | 14     |                                 |        |        |        | 91                       |
|          | 8       | 3       |                 | 0.0633                           | 42                              | 0.6581          | 91                              | 0.0761          | 26                               | 717                             | 1      | 513                             | 30     | 472    | 15     |                          |
| 44       | 92      | 86      | 1.07            |                                  | 0.00                            |                 | 0.06                            |                 | 0.00                             |                                 | 21     |                                 |        |        |        | 92                       |
|          |         |         |                 | 0.0630                           | 64                              | 0.5588          | 32                              | 0.0670          | 33                               | 709                             | 8      | 451                             | 41     | 418    | 20     |                          |
| 45       | 24      | 29      | 0.81            |                                  | 0.00                            |                 | 0.05                            |                 | 0.00                             |                                 | 15     |                                 |        |        |        | 94                       |
|          | 2       | 8       |                 | 0.0624                           | 44                              | 0.7076          | 59                              | 0.0829          | 29                               | 687                             | 1      | 543                             | 33     | 513    | 17     |                          |
| 48       | 37      | 48      | 0.79            |                                  | 0.00                            |                 | 0.04                            |                 | 0.00                             |                                 | 11     |                                 |        |        |        | 99                       |
|          | 8       | 1       |                 | 0.0583                           | 30                              | 0.6806          | 15                              | 0.0851          | 28                               | 540                             | 2      | 527                             | 25     | 527    | 16     |                          |
| 50       | 35      | 47      | 0.74            |                                  | 0.00                            |                 | 0.04                            |                 | 0.00                             |                                 | 12     |                                 |        |        |        | 99                       |
|          | 2       | 4       |                 | 0.0576                           | 33                              | 0.6494          | 32                              | 0.0817          | 29                               | 516                             | 3      | 508                             | 27     | 506    | 17     |                          |
| 4        | 11      | 22      | 0.50            |                                  | 0.01                            |                 | 0.04                            |                 | 0.00                             |                                 | 27     |                                 |        |        |        | 28                       |
|          | 4       | 6       |                 | 0.1133                           | 68                              | 0.3040          | 76                              | 0.0200          | 10                               | 1852                            | 5      | 270                             | 37     | 128    | 6      |                          |
| 19       | 13      |         | 0.59            |                                  | 0.02                            |                 | 0.05                            |                 | 0.00                             |                                 | 42     |                                 |        |        |        | 43                       |
|          | 80      | 7       |                 | 0.1011                           | 16                              | 0.2123          | 06                              | 0.0172          | 18                               | 1645                            | 5      | 195                             | 42     | 110    | 12     |                          |
| 24       | 19      | 41      | 0.48            |                                  | 0.02                            |                 | 0.07                            |                 | 0.00                             |                                 | 78     |                                 |        |        |        | 4                        |
|          | 8       | 2       |                 | 0.0558                           | 57                              | 0.1481          | 31                              | 0.0193          | 12                               | 443                             | 7      | 140                             | 65     | 123    | 8      |                          |
| 25       | 14      | 26      | 0.56            |                                  | 0.00                            |                 | 0.02                            |                 | 0.00                             |                                 | 30     |                                 |        |        |        | 70                       |
|          | 6       | 0       |                 | 0.0682                           | 99                              | 0.1652          | 60                              | 0.0180          | 11                               | 873                             | 8      | 155                             | 23     | 115    | 7      |                          |
| 26       | 15      |         | 0.60            |                                  | 0.03                            |                 | 0.09                            |                 | 0.00                             |                                 | 89     |                                 |        |        |        | 3                        |
|          | 94      | 7       |                 | 0.0739                           | 47                              | 0.1850          | 40                              | 0.0182          | 15                               | 1039                            | 9      | 172                             | 81     | 116    | 10     |                          |
| 31       | 16      | 25      | 0.65            |                                  | 0.02                            |                 | 0.05                            |                 | 0.00                             |                                 | 80     |                                 |        |        |        | 16                       |
|          | 5       | 2       |                 | 0.0461                           | 59                              | 0.0991          | 92                              | 0.0156          | 11                               | 1                               | 6      | 96                              | 55     | 100    | 7      |                          |
| 32       | 11      | 26      | 0.45            |                                  | 0.01                            |                 | 0.04                            |                 | 0.00                             |                                 | 50     |                                 |        |        |        | 20                       |
|          | 7       | 0       |                 | 0.0596                           | 61                              | 0.1391          | 16                              | 0.0169          | 09                               | 591                             | 7      | 132                             | 37     | 108    | 6      |                          |

| Spot   | Th  | U    | Isotopic Ratios |                                   |                                  |        |                                  |          | Isotopic Ages (Ma)                |     |                                  |    |                                  |    | Concordance % |
|--------|-----|------|-----------------|-----------------------------------|----------------------------------|--------|----------------------------------|----------|-----------------------------------|-----|----------------------------------|----|----------------------------------|----|---------------|
|        | ppm | ppm  | Th/U            | $^{207}\text{Pb}/^{206}\text{Pb}$ | $^{207}\text{Pb}/^{235}\text{U}$ |        | $^{206}\text{Pb}/^{238}\text{U}$ |          | $^{207}\text{Pb}/^{206}\text{Pb}$ |     | $^{207}\text{Pb}/^{235}\text{U}$ |    | $^{206}\text{Pb}/^{238}\text{U}$ |    | 1σ            |
|        |     |      |                 | 1σ                                | 1σ                               | 1σ     | 1σ                               | 1σ       | 1σ                                | 1σ  |                                  |    |                                  |    |               |
|        |     |      |                 |                                   |                                  |        |                                  |          |                                   |     |                                  |    |                                  |    |               |
| 47     | 32  | 88   | 0.36            | 0.0595                            | 0.0180                           | 0.1556 | 0.0190                           | 0.0018   | 585                               | 5   | 147                              | 47 | 121                              | 11 | 44            |
| JX12-8 |     |      |                 | Kzh <sup>1</sup>                  |                                  |        |                                  |          |                                   |     |                                  |    |                                  |    |               |
| 85     | 724 | 1725 | 0.42            | 0.0483                            | 0.0018                           | 0.1045 | 0.0040                           | 0.015705 | 122                               | 89  | 101                              | 4  | 101                              | 3  | 99            |
| 9      | 467 | 872  | 0.54            | 0.0545                            | 0.0040                           | 0.1363 | 0.0075                           | 0.018206 | 391                               | 165 | 130                              | 7  | 116                              | 4  | 88            |
| 93     | 74  | 134  | 0.55            | 0.0521                            | 0.0025                           | 0.1667 | 0.0082                           | 0.023207 | 287                               | 107 | 157                              | 7  | 148                              | 5  | 94            |
| 29     | 155 | 306  | 0.51            | 0.0481                            | 0.0023                           | 0.1687 | 0.0079                           | 0.025307 | 106                               | 11  | 158                              | 7  | 161                              | 5  | 98            |
| 35     | 255 | 475  | 0.54            | 0.0475                            | 0.0021                           | 0.1655 | 0.0069                           | 0.025307 | 76.0                              | 100 | 155                              | 6  | 161                              | 4  | 96            |
| 19     | 68  | 122  | 0.55            | 0.0508                            | 0.0036                           | 0.1797 | 0.0113                           | 0.025808 | 232                               | 163 | 168                              | 10 | 164                              | 5  | 97            |
| 15     | 59  | 114  | 0.51            | 0.0541                            | 0.0034                           | 0.1946 | 0.0111                           | 0.026108 | 376                               | 147 | 181                              | 9  | 166                              | 5  | 91            |
| 55     | 151 | 290  | 0.52            | 0.0506                            | 0.0023                           | 0.1842 | 0.0084                           | 0.026408 | 220                               | 107 | 172                              | 7  | 168                              | 5  | 97            |
| 63     | 275 | 247  | 1.11            | 0.0561                            | 0.0032                           | 0.2029 | 0.0113                           | 0.026508 | 454                               | 134 | 188                              | 10 | 169                              | 5  | 89            |
| 5      | 499 | 487  | 1.03            | 0.0530                            | 0.0021                           | 0.1938 | 0.0075                           | 0.026507 | 328                               | 87  | 180                              | 6  | 169                              | 5  | 93            |
| 73     | 425 | 803  | 0.53            | 0.0507                            | 0.0022                           | 0.1857 | 0.0084                           | 0.026708 | 228                               | 100 | 173                              | 7  | 170                              | 5  | 98            |
| 69     | 522 | 648  | 0.81            | 0.0509                            | 0.0020                           | 0.1867 | 0.0075                           | 0.026808 | 235                               | 93  | 174                              | 6  | 171                              | 5  | 98            |
| 32     | 526 | 538  | 0.98            | 0.0534                            | 0.0028                           | 0.1981 | 0.0092                           | 0.026908 | 346                               | 114 | 184                              | 8  | 171                              | 5  | 93            |
| 20     | 170 | 286  | 0.60            | 0.0552                            | 0.0028                           | 0.2044 | 0.0095                           | 0.026908 | 433                               | 113 | 189                              | 8  | 171                              | 5  | 90            |
| 45     | 253 | 340  | 0.75            | 0.0525                            | 0.0024                           | 0.1973 | 0.0086                           | 0.027108 | 306                               | 104 | 183                              | 7  | 172                              | 5  | 93            |
| 25     | 135 | 254  | 0.53            | 0.0510                            | 0.0024                           | 0.1911 | 0.0084                           | 0.027108 | 243                               | 107 | 178                              | 7  | 173                              | 5  | 97            |
| 21     | 122 | 334  | 0.37            | 0.0544                            | 0.0023                           | 0.2045 | 0.0083                           | 0.027208 | 387                               | 96  | 189                              | 7  | 173                              | 5  | 91            |

| Sp<br>ot | Th      | U       | Isotopic Ratios |                                      |                                     |                                     |                                     |                                     |                                     | Isotopic Ages (Ma)                  |                                     |                                     |                   |                   | Conc           |    |
|----------|---------|---------|-----------------|--------------------------------------|-------------------------------------|-------------------------------------|-------------------------------------|-------------------------------------|-------------------------------------|-------------------------------------|-------------------------------------|-------------------------------------|-------------------|-------------------|----------------|----|
|          | PP<br>m | PP<br>m | Th/<br>U        | <sup>207</sup> Pb/ <sup>206</sup> Pb | <sup>207</sup> Pb/ <sup>235</sup> U | <sup>206</sup> Pb/ <sup>238</sup> U | <sup>207</sup> Pb/ <sup>235</sup> U | <sup>207</sup> Pb/ <sup>235</sup> U | <sup>206</sup> Pb/ <sup>238</sup> U | <sup>207</sup> Pb/ <sup>235</sup> U | <sup>207</sup> Pb/ <sup>235</sup> U | <sup>206</sup> Pb/ <sup>238</sup> U | <sup>1</sup><br>σ | <sup>1</sup><br>σ | Danc<br>e<br>% |    |
|          |         |         |                 |                                      |                                     |                                     |                                     |                                     |                                     |                                     |                                     |                                     |                   |                   |                |    |
|          |         |         |                 |                                      |                                     |                                     |                                     |                                     |                                     |                                     |                                     |                                     |                   |                   |                |    |
| 3        | 19<br>3 | 21<br>1 | 0.91            | 0.0519                               | 0.00<br>26                          | 0.1960                              | 0.00<br>96                          | 0.0275                              | 0.00<br>08                          | 283                                 | 11<br>7                             | 182                                 | 8                 | 175               | 5              | 96 |
| 39       | 40<br>0 | 71<br>3 | 0.56            | 0.0505                               | 0.00<br>19                          | 0.1956                              | 0.00<br>76                          | 0.0279                              | 0.00<br>08                          | 217                                 | 87                                  | 181                                 | 6                 | 177               | 5              | 97 |
|          | 41<br>9 | 44<br>1 |                 |                                      | 0.95                                |                                     | 0.0545                              |                                     | 0.00<br>24                          |                                     |                                     |                                     |                   |                   |                |    |
| 33       | 77      | 13<br>5 | 0.57            | 0.0529                               | 0.00<br>31                          | 0.2011                              | 0.01<br>11                          | 0.0279                              | 0.00<br>09                          | 324                                 | 13<br>1                             | 186                                 | 9                 | 178               | 6              | 95 |
|          | 42<br>7 | 63<br>8 |                 |                                      | 0.67                                |                                     | 0.0554                              |                                     | 0.00<br>23                          |                                     |                                     |                                     |                   |                   |                |    |
| 76       | 14<br>2 | 19<br>6 | 0.73            | 0.0563                               | 0.00<br>34                          | 0.2161                              | 0.01<br>27                          | 0.0283                              | 0.00<br>09                          | 465                                 | 13<br>3                             | 199                                 | 11                | 180               | 6              | 90 |
|          | 52      | 12<br>1 |                 |                                      | 0.43                                |                                     | 0.0551                              |                                     | 0.00<br>41                          |                                     |                                     |                                     |                   |                   |                |    |
| 56       | 20<br>5 | 43<br>8 | 0.47            | 0.0552                               | 0.00<br>26                          | 0.2164                              | 0.00<br>99                          | 0.0285                              | 0.00<br>08                          | 420                                 | 10<br>1                             | 199                                 | 8                 | 181               | 5              | 90 |
|          | 36      | 11<br>3 |                 |                                      | 13<br>2                             |                                     | 0.86                                |                                     | 0.0562                              |                                     |                                     |                                     |                   |                   |                |    |
| 65       | 20<br>4 | 57<br>9 | 0.35            | 0.0496                               | 0.00<br>20                          | 0.1952                              | 0.00<br>76                          | 0.0287                              | 0.00<br>08                          | 176                                 | 12<br>7                             | 181                                 | 6                 | 182               | 5              | 99 |
|          | 10      | 84      |                 |                                      | 15<br>4                             |                                     | 0.55                                |                                     | 0.0567                              |                                     |                                     |                                     |                   |                   |                |    |
| 68       | 13<br>0 | 28<br>3 | 0.46            | 0.0527                               | 0.00<br>30                          | 0.2091                              | 0.01<br>17                          | 0.0289                              | 0.00<br>09                          | 317                                 | 12<br>7                             | 193                                 | 10                | 184               | 5              | 95 |
|          | 2       | 22<br>0 |                 |                                      | 35<br>9                             |                                     | 0.61                                |                                     | 0.0520                              |                                     |                                     |                                     |                   |                   |                |    |
| 1        | 31<br>6 | 73<br>2 | 0.43            | 0.0516                               | 0.00<br>18                          | 0.2066                              | 0.00<br>72                          | 0.0290                              | 0.00<br>08                          | 333                                 | 80                                  | 191                                 | 6                 | 184               | 5              | 96 |
|          | 41      | 31<br>8 |                 |                                      | 46<br>4                             |                                     | 0.68                                |                                     | 0.0516                              |                                     |                                     |                                     |                   |                   |                |    |
| 94       | 33<br>7 | 53<br>6 | 0.63            | 0.0492                               | 0.00<br>19                          | 0.1981                              | 0.00<br>76                          | 0.0292                              | 0.00<br>08                          | 167                                 | 95                                  | 183                                 | 6                 | 186               | 5              | 98 |
|          | 27      | 15<br>6 |                 |                                      | 23<br>3                             |                                     | 0.67                                |                                     | 0.0504                              |                                     |                                     |                                     |                   |                   |                |    |
| 30       | 35<br>6 | 39<br>4 | 0.90            | 0.0498                               | 0.00<br>22                          | 0.2022                              | 0.00<br>83                          | 0.0294                              | 0.00<br>08                          | 187                                 | 10<br>0                             | 187                                 | 7                 | 187               | 5              | 99 |

| Sp<br>ot | Th      | U        | Isotopic Ratios |                                                     |                                                    |                                                    |                                                     |                                                    |                                                    | Isotopic Ages (Ma)                                  |                                                    |                   |                                                    |                   | Conc                          |    |
|----------|---------|----------|-----------------|-----------------------------------------------------|----------------------------------------------------|----------------------------------------------------|-----------------------------------------------------|----------------------------------------------------|----------------------------------------------------|-----------------------------------------------------|----------------------------------------------------|-------------------|----------------------------------------------------|-------------------|-------------------------------|----|
|          | PP<br>m | PP<br>m  | Th/<br>U        | <sup>207</sup> Pb/ <sup>20</sup><br><sup>6</sup> Pb | <sup>207</sup> Pb/ <sup>2</sup><br><sup>35</sup> U | <sup>206</sup> Pb/ <sup>2</sup><br><sup>38</sup> U | <sup>207</sup> Pb/ <sup>20</sup><br><sup>6</sup> Pb | <sup>207</sup> Pb/ <sup>2</sup><br><sup>35</sup> U | <sup>206</sup> Pb/ <sup>2</sup><br><sup>38</sup> U | <sup>207</sup> Pb/ <sup>20</sup><br><sup>6</sup> Pb | <sup>207</sup> Pb/ <sup>2</sup><br><sup>35</sup> U | <sup>1</sup><br>σ | <sup>206</sup> Pb/ <sup>2</sup><br><sup>38</sup> U | <sup>1</sup><br>σ | Conc<br>or-<br>Danc<br>e<br>% |    |
|          |         |          |                 |                                                     |                                                    |                                                    |                                                     |                                                    |                                                    |                                                     |                                                    |                   |                                                    |                   |                               |    |
|          |         |          |                 |                                                     |                                                    |                                                    |                                                     |                                                    |                                                    |                                                     |                                                    |                   |                                                    |                   |                               |    |
| 1σ       | 1σ      | 1σ       | 1σ              | 1σ                                                  | 1σ                                                 | 1σ                                                 | 1σ                                                  | 1σ                                                 | 1σ                                                 | 1σ                                                  | 1σ                                                 | 1σ                | 1σ                                                 | 1σ                | 1σ                            |    |
| 23       | 19<br>2 | 26<br>5  | 0.72            | 0.0517                                              | 0.00<br>23                                         | 0.2108                                             | 0.00<br>93                                          | 0.0295                                             | 0.00<br>09                                         | 272                                                 | 10<br>4                                            | 194               | 8                                                  | 187               | 5                             | 96 |
| 34       | 15<br>8 | 29<br>0  | 0.54            | 0.0524                                              | 0.00<br>25                                         | 0.2126                                             | 0.00<br>94                                          | 0.0295                                             | 0.00<br>09                                         | 302                                                 | 10<br>6                                            | 196               | 8                                                  | 187               | 5                             | 95 |
| 53       | 34<br>7 | 38<br>8  | 0.89            | 0.0553                                              | 0.00<br>26                                         | 0.2254                                             | 0.01<br>04                                          | 0.0296                                             | 0.00<br>08                                         | 433                                                 | 10<br>1                                            | 206               | 9                                                  | 188               | 5                             | 90 |
| 12       | 16<br>0 | 37<br>4  | 0.43            | 0.0549                                              | 0.00<br>23                                         | 0.2269                                             | 0.00<br>94                                          | 0.0297                                             | 0.00<br>08                                         | 409                                                 | 88                                                 | 208               | 8                                                  | 189               | 5                             | 90 |
| 60       | 14<br>8 | 16<br>1  | 0.92            | 0.0573                                              | 0.00<br>43                                         | 0.2276                                             | 0.01<br>63                                          | 0.0297                                             | 0.00<br>10                                         | 502                                                 | 16<br>7                                            | 208               | 14                                                 | 189               | 6                             | 90 |
| 59       | 24<br>2 | 21<br>6  | 1.12            | 0.0567                                              | 0.00<br>51                                         | 0.2248                                             | 0.01<br>82                                          | 0.0298                                             | 0.00<br>11                                         | 480                                                 | 20<br>0                                            | 206               | 15                                                 | 189               | 7                             | 91 |
| 44       | 12<br>0 | 17<br>5  | 0.69            | 0.0550                                              | 0.00<br>33                                         | 0.2244                                             | 0.01<br>30                                          | 0.0298                                             | 0.00<br>09                                         | 413                                                 | 13<br>5                                            | 206               | 11                                                 | 189               | 6                             | 91 |
| 18       | 20<br>3 | 62<br>5  | 0.33            | 0.0534                                              | 0.00<br>20                                         | 0.2216                                             | 0.00<br>81                                          | 0.0298                                             | 0.00<br>08                                         | 346                                                 | 83                                                 | 203               | 7                                                  | 189               | 5                             | 92 |
| 71       | 25<br>8 | 39<br>8  | 0.65            | 0.0539                                              | 0.00<br>23                                         | 0.2199                                             | 0.00<br>93                                          | 0.0299                                             | 0.00<br>09                                         | 365                                                 | 62                                                 | 202               | 8                                                  | 190               | 6                             | 93 |
| 11       | 28<br>0 | 68<br>1  | 0.41            | 0.0523                                              | 0.00<br>19                                         | 0.2174                                             | 0.00<br>79                                          | 0.0299                                             | 0.00<br>08                                         | 298                                                 | 88                                                 | 200               | 7                                                  | 190               | 5                             | 95 |
| 58       | 79<br>1 | 10<br>63 | 0.74            | 0.0517                                              | 0.00<br>18                                         | 0.2139                                             | 0.00<br>75                                          | 0.0300                                             | 0.00<br>08                                         | 272                                                 | 81                                                 | 197               | 6                                                  | 191               | 5                             | 96 |
| 57       | 10<br>3 | 91       | 1.12            | 0.0560                                              | 0.00<br>44                                         | 0.2278                                             | 0.01<br>72                                          | 0.0300                                             | 0.00<br>10                                         | 454                                                 | 14<br>4                                            | 208               | 14                                                 | 191               | 6                             | 91 |
| 77       | 21<br>3 | 33<br>9  | 0.63            | 0.0560                                              | 0.00<br>26                                         | 0.2285                                             | 0.01<br>01                                          | 0.0301                                             | 0.00<br>09                                         | 450                                                 | 10<br>6                                            | 209               | 8                                                  | 191               | 6                             | 91 |
| 61       | 13<br>3 | 13<br>1  | 1.02            | 0.0553                                              | 0.00<br>38                                         | 0.2269                                             | 0.01<br>37                                          | 0.0306                                             | 0.00<br>10                                         | 433                                                 | 15<br>2                                            | 208               | 11                                                 | 195               | 6                             | 93 |
| 37       | 18<br>7 | 34<br>8  | 0.54            | 0.0495                                              | 0.00<br>22                                         | 0.2105                                             | 0.00<br>94                                          | 0.0307                                             | 0.00<br>09                                         | 169                                                 | 10<br>6                                            | 194               | 8                                                  | 195               | 5                             | 99 |
| 42       | 15<br>6 | 33<br>3  | 0.47            | 0.0500                                              | 0.00<br>22                                         | 0.2123                                             | 0.00<br>87                                          | 0.0308                                             | 0.00<br>09                                         | 195                                                 | 10<br>0                                            | 195               | 7                                                  | 196               | 5                             | 99 |
| 92       | 26<br>7 | 81<br>8  | 0.33            | 0.0544                                              | 0.00<br>24                                         | 0.2325                                             | 0.01<br>01                                          | 0.0311                                             | 0.00<br>09                                         | 387                                                 | 98                                                 | 212               | 8                                                  | 197               | 6                             | 92 |
| 86       | 44<br>2 | 55<br>7  | 0.79            | 0.0532                                              | 0.00<br>28                                         | 0.2254                                             | 0.01<br>09                                          | 0.0312                                             | 0.00<br>10                                         | 339                                                 | 11<br>7                                            | 206               | 9                                                  | 198               | 6                             | 95 |

| Spot | Th  | U    | Isotopic Ratios |                                      |                                     |                                     |                                      |                                     |                                     | Isotopic Ages (Ma)                   |                                     |                                     |                |                | Conc  |    |
|------|-----|------|-----------------|--------------------------------------|-------------------------------------|-------------------------------------|--------------------------------------|-------------------------------------|-------------------------------------|--------------------------------------|-------------------------------------|-------------------------------------|----------------|----------------|-------|----|
|      | ppm | ppm  | Th/U            | <sup>207</sup> Pb/ <sup>206</sup> Pb | <sup>207</sup> Pb/ <sup>235</sup> U | <sup>206</sup> Pb/ <sup>238</sup> U | <sup>207</sup> Pb/ <sup>206</sup> Pb | <sup>207</sup> Pb/ <sup>235</sup> U | <sup>206</sup> Pb/ <sup>238</sup> U | <sup>207</sup> Pb/ <sup>206</sup> Pb | <sup>207</sup> Pb/ <sup>235</sup> U | <sup>206</sup> Pb/ <sup>238</sup> U | <sup>1</sup> σ | <sup>1</sup> σ | Dance |    |
|      |     |      |                 |                                      |                                     |                                     |                                      |                                     |                                     |                                      |                                     |                                     |                |                |       |    |
|      |     |      |                 |                                      |                                     |                                     |                                      |                                     |                                     |                                      |                                     |                                     |                |                |       |    |
|      |     |      |                 |                                      |                                     |                                     |                                      |                                     |                                     |                                      |                                     |                                     |                |                |       |    |
| 82   | 223 | 190  | 1.17            | 0.0518                               | 0.0031                              | 0.2223                              | 0.0133                               | 0.0313                              | 0.0009                              | 276                                  | 137                                 | 204                                 | 11             | 199            | 6     | 97 |
| 51   | 838 | 128  | 0.65            | 0.0533                               | 0.0036                              | 0.2232                              | 0.0132                               | 0.0314                              | 0.0010                              | 339                                  | 149                                 | 205                                 | 11             | 199            | 6     | 97 |
| 83   | 421 | 825  | 0.51            | 0.0495                               | 0.0020                              | 0.2132                              | 0.0086                               | 0.0314                              | 0.0009                              | 172                                  | 96                                  | 196                                 | 7              | 199            | 6     | 98 |
| 81   | 241 | 246  | 0.98            | 0.0549                               | 0.0029                              | 0.2347                              | 0.0121                               | 0.0314                              | 0.0010                              | 406                                  | 119                                 | 214                                 | 10             | 199            | 6     | 92 |
| 88   | 101 | 234  | 0.43            | 0.0559                               | 0.0034                              | 0.2411                              | 0.0128                               | 0.0316                              | 0.0010                              | 450                                  | 142                                 | 219                                 | 10             | 200            | 6     | 91 |
| 84   | 393 | 935  | 0.42            | 0.0537                               | 0.0023                              | 0.2320                              | 0.0100                               | 0.0316                              | 0.0010                              | 367                                  | 98                                  | 212                                 | 8              | 201            | 6     | 94 |
| 78   | 104 | 157  | 0.66            | 0.0558                               | 0.0034                              | 0.2473                              | 0.0154                               | 0.0321                              | 0.0010                              | 443                                  | 133                                 | 224                                 | 13             | 204            | 6     | 90 |
| 87   | 237 | 448  | 0.53            | 0.0516                               | 0.0025                              | 0.2291                              | 0.0107                               | 0.0322                              | 0.0009                              | 333                                  | 103                                 | 209                                 | 9              | 204            | 6     | 97 |
| 54   | 253 | 544  | 0.46            | 0.0543                               | 0.0022                              | 0.2445                              | 0.0097                               | 0.0326                              | 0.0009                              | 383                                  | 89                                  | 222                                 | 8              | 207            | 6     | 92 |
| 4    | 198 | 394  | 0.50            | 0.0573                               | 0.0021                              | 0.2578                              | 0.0095                               | 0.0327                              | 0.0009                              | 502                                  | 81                                  | 233                                 | 8              | 207            | 6     | 88 |
| 8    | 166 | 181  | 0.92            | 0.0590                               | 0.0032                              | 0.2648                              | 0.0139                               | 0.0327                              | 0.0010                              | 569                                  | 114                                 | 239                                 | 11             | 208            | 6     | 86 |
| 66   | 193 | 185  | 1.04            | 0.0561                               | 0.0037                              | 0.2478                              | 0.0152                               | 0.0328                              | 0.0011                              | 457                                  | 144                                 | 225                                 | 12             | 208            | 7     | 92 |
| 64   | 739 | 1244 | 0.59            | 0.0491                               | 0.0019                              | 0.2243                              | 0.0083                               | 0.0332                              | 0.0009                              | 154                                  | 89                                  | 205                                 | 7              | 210            | 6     | 97 |
| 91   | 268 | 514  | 0.52            | 0.0561                               | 0.0024                              | 0.2571                              | 0.0109                               | 0.0332                              | 0.0010                              | 457                                  | 92                                  | 232                                 | 9              | 211            | 6     | 90 |
| 43   | 121 | 143  | 0.85            | 0.0558                               | 0.0036                              | 0.2551                              | 0.0156                               | 0.0334                              | 0.0010                              | 443                                  | 147                                 | 231                                 | 13             | 212            | 6     | 91 |
| 72   | 525 | 781  | 0.67            | 0.0520                               | 0.0020                              | 0.2548                              | 0.0101                               | 0.0356                              | 0.0010                              | 283                                  | 91                                  | 230                                 | 8              | 226            | 7     | 97 |
| 38   | 251 | 898  | 0.28            | 0.0502                               | 0.0017                              | 0.2912                              | 0.0098                               | 0.0418                              | 0.0011                              | 206                                  | 78                                  | 260                                 | 8              | 264            | 7     | 98 |
| 67   | 551 | 1677 | 0.33            | 0.0516                               | 0.0017                              | 0.3019                              | 0.0103                               | 0.0423                              | 0.0012                              | 333                                  | 72                                  | 268                                 | 8              | 267            | 7     | 99 |

| Spot | Th/U |      | Th/U | Isotopic Ratios                      |                                     |        |                                     |        |                                      | Isotopic Ages (Ma)                  |     |                                     |     |     |     | Concordance % |
|------|------|------|------|--------------------------------------|-------------------------------------|--------|-------------------------------------|--------|--------------------------------------|-------------------------------------|-----|-------------------------------------|-----|-----|-----|---------------|
|      | ppm  | ppm  |      | <sup>207</sup> Pb/ <sup>206</sup> Pb | <sup>207</sup> Pb/ <sup>235</sup> U |        | <sup>206</sup> Pb/ <sup>238</sup> U |        | <sup>207</sup> Pb/ <sup>206</sup> Pb | <sup>207</sup> Pb/ <sup>235</sup> U |     | <sup>206</sup> Pb/ <sup>238</sup> U |     |     |     |               |
|      |      |      |      |                                      | 1σ                                  | 1σ     | 1σ                                  | 1σ     |                                      | 1σ                                  | 1σ  |                                     |     |     |     |               |
|      |      |      |      |                                      |                                     |        |                                     |        |                                      |                                     |     |                                     |     |     |     |               |
| 70   | 203  | 781  | 0.26 | 0.0579                               | 0.0020                              | 0.3736 | 0.0175                              | 0.0463 | 0.0018                               | 528                                 | 81  | 322                                 | 13  | 292 | 11  | 90            |
| 90   | 111  | 212  | 0.52 | 0.0536                               | 0.0031                              | 0.3407 | 0.0186                              | 0.0472 | 0.0015                               | 354                                 | 131 | 298                                 | 14  | 297 | 9   | 99            |
|      | 1    | 2    |      |                                      |                                     |        |                                     |        |                                      |                                     |     |                                     |     |     |     |               |
| 96   | 157  | 882  | 0.18 | 0.1225                               | 0.0352                              | 0.4545 | 0.2231                              | 0.0648 | 0.0455                               | 1994                                | 532 | 380                                 | 156 | 405 | 276 | 93            |
|      | 7    | 2    |      |                                      |                                     |        |                                     |        |                                      |                                     |     |                                     |     |     |     |               |
| 95   | 411  | 1142 | 0.36 | 0.0663                               | 0.0024                              | 0.6355 | 0.0230                              | 0.0694 | 0.0020                               | 817                                 | 78  | 500                                 | 14  | 433 | 12  | 85            |
|      | 1    | 42   |      |                                      |                                     |        |                                     |        |                                      |                                     |     |                                     |     |     |     |               |
| 26   | 24   | 55   | 0.45 | 0.0638                               | 0.0044                              | 0.6100 | 0.0401                              | 0.0701 | 0.0023                               | 744                                 | 146 | 484                                 | 25  | 437 | 14  | 89            |
| 47   | 195  | 563  | 0.35 | 0.0556                               | 0.0019                              | 0.5960 | 0.0196                              | 0.0770 | 0.0021                               | 439                                 | 81  | 475                                 | 13  | 478 | 13  | 99            |
| 6    | 95   | 204  | 0.46 | 0.0593                               | 0.0030                              | 0.2186 | 0.0107                              | 0.0269 | 0.0008                               | 576                                 | 111 | 201                                 | 9   | 171 | 5   | 84            |
| 74   | 99   | 199  | 0.50 | 0.0615                               | 0.0030                              | 0.2400 | 0.0117                              | 0.0286 | 0.0008                               | 657                                 | 106 | 218                                 | 10  | 182 | 5   | 81            |
| 46   | 59   | 72   | 0.82 | 0.0666                               | 0.0043                              | 0.4233 | 0.0235                              | 0.0463 | 0.0015                               | 826                                 | 133 | 358                                 | 17  | 292 | 10  | 79            |
| 14   | 125  | 130  | 0.96 | 0.0651                               | 0.0038                              | 0.2514 | 0.0140                              | 0.0281 | 0.0009                               | 789                                 | 122 | 228                                 | 11  | 179 | 5   | 75            |
| 48   | 60   | 92   | 0.66 | 0.0652                               | 0.0045                              | 0.2769 | 0.0200                              | 0.0306 | 0.0011                               | 781                                 | 146 | 248                                 | 16  | 194 | 7   | 75            |
| 13   | 84   | 101  | 0.83 | 0.0740                               | 0.0068                              | 0.3143 | 0.0263                              | 0.0315 | 0.0013                               | 1040                                | 187 | 278                                 | 20  | 200 | 8   | 67            |
| 28   | 340  | 601  | 0.57 | 0.0731                               | 0.0030                              | 0.3454 | 0.0137                              | 0.0342 | 0.0010                               | 1017                                | 82  | 301                                 | 10  | 217 | 6   | 67            |
| 79   | 180  | 288  | 0.62 | 0.0715                               | 0.0042                              | 0.2103 | 0.0113                              | 0.0219 | 0.0007                               | 972                                 | 119 | 194                                 | 9   | 139 | 4   | 67            |
| 7    | 125  | 212  | 0.59 | 0.0741                               | 0.0037                              | 0.3227 | 0.0156                              | 0.0317 | 0.0010                               | 1044                                | 99  | 284                                 | 12  | 201 | 6   | 66            |
| 17   | 71   | 127  | 0.56 | 0.0682                               | 0.0049                              | 0.2071 | 0.0138                              | 0.0209 | 0.0007                               | 874                                 | 150 | 191                                 | 12  | 134 | 4   | 64            |
| 80   | 166  | 197  | 0.84 | 0.0757                               | 0.0053                              | 0.3165 | 0.0208                              | 0.0306 | 0.0010                               | 1087                                | 139 | 279                                 | 16  | 194 | 6   | 64            |
| 62   | 93   | 119  | 0.78 | 0.0794                               | 0.0043                              | 0.3499 | 0.0177                              | 0.0326 | 0.0010                               | 1183                                | 107 | 305                                 | 13  | 207 | 6   | 61            |



| Spot                    | Th/U |      | Th/U | Isotopic Ratios                      |                                     |        |                                     |        |                                      | Isotopic Ages (Ma)                  |     |                                     |    |     |   | Concordance % |
|-------------------------|------|------|------|--------------------------------------|-------------------------------------|--------|-------------------------------------|--------|--------------------------------------|-------------------------------------|-----|-------------------------------------|----|-----|---|---------------|
|                         | ppm  | ppm  |      | <sup>207</sup> Pb/ <sup>206</sup> Pb | <sup>207</sup> Pb/ <sup>235</sup> U |        | <sup>206</sup> Pb/ <sup>238</sup> U |        | <sup>207</sup> Pb/ <sup>206</sup> Pb | <sup>207</sup> Pb/ <sup>235</sup> U |     | <sup>206</sup> Pb/ <sup>238</sup> U |    |     |   |               |
|                         |      |      |      |                                      | 1σ                                  | 1σ     | 1σ                                  | 1σ     |                                      | 1σ                                  | 1σ  | 1σ                                  | 1σ |     |   |               |
|                         |      |      |      |                                      |                                     |        |                                     |        |                                      |                                     |     |                                     |    |     |   |               |
| 31                      | 950  | 1064 | 0.89 | 0.0775                               | 0.0037                              | 0.3397 | 0.0184                              | 0.0308 | 0.0009                               | 1144                                | 94  | 297                                 | 14 | 196 | 6 | 58            |
| 16                      | 1178 | 940  | 1.25 | 0.0829                               | 0.0042                              | 0.2674 | 0.0142                              | 0.0231 | 0.0008                               | 1278                                | 100 | 241                                 | 11 | 148 | 5 | 52            |
|                         | 42   | 42   |      |                                      |                                     |        |                                     |        |                                      |                                     |     |                                     |    |     |   |               |
| 50                      | 117  | 87   | 1.35 | 0.0961                               | 0.0070                              | 0.2857 | 0.0189                              | 0.0217 | 0.0008                               | 1550                                | 137 | 255                                 | 15 | 139 | 5 | 40            |
|                         | 70   | 89   |      |                                      |                                     |        |                                     |        |                                      |                                     |     |                                     |    |     |   |               |
| 24                      | 4440 | 5421 | 0.82 | 0.1312                               | 0.0044                              | 0.6535 | 0.0236                              | 0.0357 | 0.0010                               | 2115                                | 59  | 511                                 | 15 | 226 | 6 | 22            |
|                         | 44   | 36   |      |                                      |                                     |        |                                     |        |                                      |                                     |     |                                     |    |     |   |               |
| 52                      | 74   | 69   | 1.08 | 0.1430                               | 0.0120                              | 0.3519 | 0.0257                              | 0.0190 | 0.0008                               | 2265                                | 140 | 306                                 | 19 | 121 | 5 | 13            |
| 75                      | 133  | 190  | 0.70 | 0.1614                               | 0.0111                              | 0.7536 | 0.0509                              | 0.0346 | 0.0012                               | 2472                                | 117 | 570                                 | 29 | 219 | 8 | 11            |
| JX12-6 Kzh <sup>1</sup> |      |      |      |                                      |                                     |        |                                     |        |                                      |                                     |     |                                     |    |     |   |               |
| 12                      | 267  | 433  | 0.62 | 0.0480                               | 0.0026                              | 0.0979 | 0.0053                              | 0.0148 | 0.0004                               | 102                                 | 131 | 94.9                                | 5  | 95  | 3 | 99            |
| 11                      | 978  | 1604 | 0.61 | 0.0477                               | 0.0018                              | 0.1007 | 0.0037                              | 0.0152 | 0.0004                               | 83.4                                | 89  | 97.4                                | 3  | 97  | 3 | 99            |
| 24                      | 43   | 149  | 0.29 | 0.0505                               | 0.0042                              | 0.1101 | 0.0090                              | 0.0163 | 0.0005                               | 217                                 | 229 | 106                                 | 8  | 104 | 3 | 98            |
| 30                      | 447  | 397  | 1.13 | 0.0542                               | 0.0032                              | 0.1296 | 0.0067                              | 0.0175 | 0.0005                               | 389                                 | 135 | 124                                 | 6  | 112 | 3 | 90            |
| 3                       | 146  | 255  | 0.57 | 0.0552                               | 0.0052                              | 0.1303 | 0.0115                              | 0.0179 | 0.0008                               | 420                                 | 213 | 124                                 | 10 | 114 | 5 | 91            |
| 32                      | 1480 | 1031 | 1.44 | 0.0528                               | 0.0023                              | 0.1335 | 0.0058                              | 0.0183 | 0.0005                               | 320                                 | 100 | 127                                 | 5  | 117 | 3 | 91            |
| 45                      | 283  | 539  | 0.52 | 0.0536                               | 0.0024                              | 0.1425 | 0.0063                              | 0.0194 | 0.0006                               | 354                                 | 99  | 135                                 | 6  | 124 | 4 | 90            |
| 35                      | 38   | 64   | 0.59 | 0.0524                               | 0.0057                              | 0.1744 | 0.0176                              | 0.0246 | 0.0010                               | 302                                 | 250 | 163                                 | 15 | 156 | 6 | 95            |
| 78                      | 261  | 328  | 0.79 | 0.0473                               | 0.0026                              | 0.1693 | 0.0092                              | 0.0258 | 0.0008                               | 64.9                                | 130 | 159                                 | 8  | 164 | 5 | 96            |
| 19                      | 122  | 236  | 0.52 | 0.0523                               | 0.0029                              | 0.1850 | 0.0097                              | 0.0259 | 0.0008                               | 302                                 | 134 | 172                                 | 8  | 165 | 5 | 95            |
| 5                       | 65   | 154  | 0.42 | 0.0559                               | 0.0046                              | 0.1950 | 0.0152                              | 0.0260 | 0.0009                               | 456                                 | 183 | 181                                 | 13 | 165 | 6 | 90            |
| 18                      | 392  | 448  | 0.88 | 0.0501                               | 0.0021                              | 0.1803 | 0.0071                              | 0.0260 | 0.0007                               | 198                                 | 96  | 168                                 | 6  | 166 | 5 | 98            |

| Sp<br>ot | Th      | U        | Isotopic Ratios |                                      |                                     |        |                                     |        |                                      | Isotopic Ages (Ma)                  |         |                                     |    |      |   | Conc |
|----------|---------|----------|-----------------|--------------------------------------|-------------------------------------|--------|-------------------------------------|--------|--------------------------------------|-------------------------------------|---------|-------------------------------------|----|------|---|------|
|          | PP<br>m | PP<br>m  | Th/<br>U        | <sup>207</sup> Pb/ <sup>206</sup> Pb | <sup>207</sup> Pb/ <sup>235</sup> U |        | <sup>206</sup> Pb/ <sup>238</sup> U |        | <sup>207</sup> Pb/ <sup>206</sup> Pb | <sup>207</sup> Pb/ <sup>235</sup> U |         | <sup>206</sup> Pb/ <sup>238</sup> U |    | Danc |   |      |
|          |         |          |                 |                                      | 1σ                                  | 1σ     | 1σ                                  | 1σ     |                                      | 1σ                                  | 1σ      |                                     |    |      |   |      |
|          |         |          |                 |                                      |                                     |        |                                     |        |                                      |                                     |         | 1σ                                  | 1σ |      |   |      |
| 75       | 13<br>9 | 43<br>5  | 0.32            | 0.0516                               | 0.00<br>24                          | 0.1873 | 0.00<br>87                          | 0.0262 | 0.00<br>08                           | 333                                 | 10<br>9 | 174                                 | 7  | 167  | 5 | 95   |
| 95       | 39<br>6 | 57<br>9  | 0.68            | 0.0489                               | 0.00<br>30                          | 0.1761 | 0.01<br>03                          | 0.0263 | 0.00<br>08                           | 146                                 | 13<br>3 | 165                                 | 9  | 167  | 5 | 98   |
| 34       | 14<br>7 | 20<br>3  | 0.72            | 0.0493                               | 0.00<br>29                          | 0.1785 | 0.01<br>01                          | 0.0263 | 0.00<br>08                           | 161                                 | 14<br>0 | 167                                 | 9  | 167  | 5 | 99   |
| 80       | 16<br>3 | 51<br>8  | 0.32            | 0.0509                               | 0.00<br>32                          | 0.1854 | 0.01<br>04                          | 0.0264 | 0.00<br>08                           | 235                                 | 14<br>6 | 173                                 | 9  | 168  | 5 | 97   |
| 56       | 43<br>9 | 84<br>0  | 0.52            | 0.0484                               | 0.00<br>20                          | 0.1788 | 0.00<br>72                          | 0.0266 | 0.00<br>08                           | 117                                 | 98      | 167                                 | 6  | 169  | 5 | 98   |
| 49       | 32<br>0 | 49<br>8  | 0.64            | 0.0547                               | 0.00<br>36                          | 0.2031 | 0.01<br>12                          | 0.0267 | 0.00<br>08                           | 467                                 | 14<br>4 | 188                                 | 9  | 170  | 5 | 90   |
| 16       | 46<br>1 | 64<br>7  | 0.71            | 0.0516                               | 0.00<br>21                          | 0.1923 | 0.00<br>78                          | 0.0268 | 0.00<br>07                           | 265                                 | 99      | 179                                 | 7  | 170  | 5 | 95   |
| 55       | 17<br>0 | 41<br>1  | 0.41            | 0.0462                               | 0.00<br>25                          | 0.1723 | 0.00<br>88                          | 0.0271 | 0.00<br>08                           | 5.7                                 | 12<br>6 | 161                                 | 8  | 172  | 5 | 93   |
| 72       | 11<br>6 | 11<br>2  | 1.03            | 0.0549                               | 0.00<br>44                          | 0.2013 | 0.01<br>47                          | 0.0272 | 0.00<br>09                           | 409                                 | 18<br>6 | 186                                 | 12 | 173  | 6 | 92   |
| 42       | 40<br>1 | 80<br>2  | 0.50            | 0.0463                               | 0.00<br>21                          | 0.1742 | 0.00<br>73                          | 0.0273 | 0.00<br>08                           | 16.8                                | 10<br>4 | 163                                 | 6  | 173  | 5 | 93   |
| 29       | 16<br>2 | 30<br>3  | 0.53            | 0.0492                               | 0.00<br>26                          | 0.1867 | 0.01<br>00                          | 0.0274 | 0.00<br>08                           | 154                                 | 12<br>1 | 174                                 | 9  | 174  | 5 | 99   |
| 84       | 19<br>9 | 33<br>4  | 0.60            | 0.0488                               | 0.00<br>27                          | 0.1868 | 0.00<br>99                          | 0.0275 | 0.00<br>09                           | 200                                 | 69      | 174                                 | 8  | 175  | 5 | 99   |
| 73       | 52<br>4 | 13<br>18 | 0.40            | 0.0533                               | 0.00<br>20                          | 0.2048 | 0.00<br>79                          | 0.0278 | 0.00<br>08                           | 343                                 | 87      | 189                                 | 7  | 177  | 5 | 93   |
| 57       | 14<br>1 | 32<br>0  | 0.44            | 0.0492                               | 0.00<br>27                          | 0.1891 | 0.01<br>00                          | 0.0278 | 0.00<br>08                           | 167                                 | 12<br>3 | 176                                 | 9  | 177  | 5 | 99   |
| 6        | 19<br>8 | 30<br>2  | 0.66            | 0.0510                               | 0.00<br>26                          | 0.1964 | 0.00<br>98                          | 0.0278 | 0.00<br>08                           | 239                                 | 11<br>5 | 182                                 | 8  | 177  | 5 | 97   |
| 90       | 15<br>3 | 24<br>4  | 0.63            | 0.0507                               | 0.00<br>37                          | 0.1918 | 0.01<br>30                          | 0.0278 | 0.00<br>09                           | 228                                 | 16<br>6 | 178                                 | 11 | 177  | 6 | 99   |
| 54       | 76<br>0 | 15<br>0  | 0.51            | 0.0504                               | 0.00<br>32                          | 0.1917 | 0.01<br>19                          | 0.0278 | 0.00<br>09                           | 213                                 | 15<br>0 | 178                                 | 10 | 177  | 6 | 99   |
| 40       | 21<br>6 | 37<br>3  | 0.58            | 0.0496                               | 0.00<br>23                          | 0.1927 | 0.00<br>86                          | 0.0279 | 0.00<br>08                           | 176                                 | 10<br>7 | 179                                 | 7  | 177  | 5 | 99   |

| Sp<br>ot | Th      | U       | Isotopic Ratios |                                      |                                     |        |                                     |        |                                      | Isotopic Ages (Ma)                  |     |                                     |    |        |        | Conc |
|----------|---------|---------|-----------------|--------------------------------------|-------------------------------------|--------|-------------------------------------|--------|--------------------------------------|-------------------------------------|-----|-------------------------------------|----|--------|--------|------|
|          | PP<br>m | PP<br>m | Th/<br>U        | <sup>207</sup> Pb/ <sup>206</sup> Pb | <sup>207</sup> Pb/ <sup>235</sup> U |        | <sup>206</sup> Pb/ <sup>238</sup> U |        | <sup>207</sup> Pb/ <sup>206</sup> Pb | <sup>207</sup> Pb/ <sup>235</sup> U |     | <sup>206</sup> Pb/ <sup>238</sup> U |    | 1<br>σ | 1<br>σ |      |
|          |         |         |                 |                                      | 1σ                                  | 1σ     | 1σ                                  | 1σ     |                                      | 1σ                                  | 1σ  |                                     |    |        |        |      |
|          |         |         |                 |                                      |                                     |        |                                     |        |                                      |                                     |     |                                     |    |        |        |      |
| 23       | 194     | 345     | 0.56            | 0.0510                               | 0.0024                              | 0.1960 | 0.0090                              | 0.0279 | 0.0008                               | 243                                 | 111 | 182                                 | 8  | 177    | 5      | 97   |
| 37       | 137     | 125     | 1.10            | 0.0510                               | 0.0038                              | 0.1908 | 0.0125                              | 0.0279 | 0.0009                               | 239                                 | 205 | 177                                 | 11 | 177    | 5      | 99   |
|          | 75      | 38      |                 |                                      | 25                                  |        | 09                                  |        | 5                                    |                                     |     |                                     |    |        |        |      |
| 26       | 169     | 156     | 1.09            | 0.0548                               | 0.0032                              | 0.2128 | 0.0125                              | 0.0280 | 0.0009                               | 406                                 | 99  | 196                                 | 10 | 178    | 6      | 90   |
|          | 96      | 32      |                 |                                      | 25                                  |        | 09                                  |        |                                      |                                     |     |                                     |    |        |        |      |
| 7        | 163     | 262     | 0.62            | 0.0510                               | 0.0025                              | 0.1968 | 0.0093                              | 0.0280 | 0.0008                               | 239                                 | 113 | 182                                 | 8  | 178    | 5      | 97   |
|          | 32      | 25      |                 |                                      | 93                                  |        | 08                                  |        | 3                                    |                                     |     |                                     |    |        |        |      |
| 81       | 136     | 225     | 0.60            | 0.0509                               | 0.0040                              | 0.1964 | 0.0142                              | 0.0281 | 0.0009                               | 235                                 | 177 | 182                                 | 12 | 178    | 6      | 97   |
|          | 65      | 40      |                 |                                      | 42                                  |        | 09                                  |        | 7                                    |                                     |     |                                     |    |        |        |      |
| 61       | 232     | 579     | 0.40            | 0.0504                               | 0.0026                              | 0.1948 | 0.0091                              | 0.0281 | 0.0008                               | 213                                 | 122 | 181                                 | 8  | 179    | 5      | 98   |
|          | 29      | 26      |                 |                                      | 91                                  |        | 08                                  |        | 2                                    |                                     |     |                                     |    |        |        |      |
| 48       | 110     | 351     | 0.31            | 0.0553                               | 0.0030                              | 0.2155 | 0.0118                              | 0.0283 | 0.0009                               | 433                                 | 124 | 198                                 | 10 | 180    | 5      | 90   |
|          | 01      | 30      |                 |                                      | 18                                  |        | 09                                  |        | 4                                    |                                     |     |                                     |    |        |        |      |
| 92       | 414     | 347     | 1.19            | 0.0525                               | 0.0028                              | 0.2031 | 0.0099                              | 0.0283 | 0.0009                               | 309                                 | 125 | 188                                 | 8  | 180    | 5      | 95   |
|          | 47      | 28      |                 |                                      | 99                                  |        | 09                                  |        | 5                                    |                                     |     |                                     |    |        |        |      |
| 82       | 128     | 230     | 0.56            | 0.0504                               | 0.0033                              | 0.1965 | 0.0118                              | 0.0283 | 0.0009                               | 213                                 | 156 | 182                                 | 10 | 180    | 6      | 98   |
|          | 80      | 33      |                 |                                      | 18                                  |        | 09                                  |        | 6                                    |                                     |     |                                     |    |        |        |      |
| 1        | 300     | 391     | 0.77            | 0.0546                               | 0.0034                              | 0.2128 | 0.0119                              | 0.0284 | 0.0008                               | 394                                 | 139 | 196                                 | 10 | 181    | 5      | 91   |
|          | 01      | 34      |                 |                                      | 19                                  |        | 08                                  |        | 9                                    |                                     |     |                                     |    |        |        |      |
| 4        | 109     | 127     | 0.87            | 0.0549                               | 0.0043                              | 0.2174 | 0.0161                              | 0.0285 | 0.0010                               | 409                                 | 169 | 200                                 | 13 | 181    | 6      | 90   |
|          | 97      | 43      |                 |                                      | 61                                  |        | 10                                  |        | 9                                    |                                     |     |                                     |    |        |        |      |
| 36       | 817     | 1267    | 0.64            | 0.0495                               | 0.0020                              | 0.1964 | 0.0077                              | 0.0286 | 0.0008                               | 172                                 | 96  | 182                                 | 7  | 181    | 5      | 99   |
|          | 75      | 20      |                 |                                      | 77                                  |        | 08                                  |        | 12                                   |                                     |     |                                     |    |        |        |      |
| 46       | 70      | 117     | 0.59            | 0.0540                               | 0.0037                              | 0.2115 | 0.0134                              | 0.0288 | 0.0009                               | 372                                 | 152 | 195                                 | 11 | 183    | 6      | 93   |
|          | 00      | 37      |                 |                                      | 34                                  |        | 09                                  |        | 2                                    |                                     |     |                                     |    |        |        |      |
| 39       | 957     | 741     | 1.29            | 0.0490                               | 0.0019                              | 0.1968 | 0.0077                              | 0.0289 | 0.0008                               | 150                                 | 93  | 182                                 | 7  | 183    | 5      | 99   |
|          | 95      | 19      |                 |                                      | 77                                  |        | 08                                  |        | 3                                    |                                     |     |                                     |    |        |        |      |
| 52       | 699     | 829     | 0.84            | 0.0477                               | 0.0020                              | 0.1915 | 0.0080                              | 0.0289 | 0.0008                               | 83.4                                | 106 | 178                                 | 7  | 183    | 5      | 96   |
|          | 99      | 20      |                 |                                      | 80                                  |        | 08                                  |        | 6                                    |                                     |     |                                     |    |        |        |      |
| 67       | 383     | 149     | 0.26            | 0.0528                               | 0.0022                              | 0.2110 | 0.0081                              | 0.0289 | 0.0008                               | 320                                 | 88  | 194                                 | 7  | 184    | 5      | 94   |
|          | 35      | 22      |                 |                                      | 81                                  |        | 08                                  |        | 1                                    |                                     |     |                                     |    |        |        |      |
| 76       | 174     | 217     | 0.80            | 0.0495                               | 0.0036                              | 0.1933 | 0.0128                              | 0.0290 | 0.0009                               | 172                                 | 159 | 179                                 | 11 | 184    | 6      | 97   |
|          | 75      | 36      |                 |                                      | 28                                  |        | 09                                  |        | 9                                    |                                     |     |                                     |    |        |        |      |
| 77       | 154     | 259     | 0.59            | 0.0557                               | 0.0035                              | 0.2220 | 0.0133                              | 0.0290 | 0.0009                               | 439                                 | 138 | 204                                 | 11 | 184    | 5      | 90   |
|          | 75      | 35      |                 |                                      | 33                                  |        | 09                                  |        | 8                                    |                                     |     |                                     |    |        |        |      |

| Sp<br>ot | Th      | U       | Isotopic Ratios |                                      |                                     |        |                                     |        |                                      | Isotopic Ages (Ma)                  |     |                                     |    |      |   | Conc |
|----------|---------|---------|-----------------|--------------------------------------|-------------------------------------|--------|-------------------------------------|--------|--------------------------------------|-------------------------------------|-----|-------------------------------------|----|------|---|------|
|          | PP<br>m | PP<br>m | Th/<br>U        | <sup>207</sup> Pb/ <sup>206</sup> Pb | <sup>207</sup> Pb/ <sup>235</sup> U |        | <sup>206</sup> Pb/ <sup>238</sup> U |        | <sup>207</sup> Pb/ <sup>206</sup> Pb | <sup>207</sup> Pb/ <sup>235</sup> U |     | <sup>206</sup> Pb/ <sup>238</sup> U |    | Danc |   |      |
|          |         |         |                 |                                      | 1σ                                  | 1σ     | 1σ                                  | 1σ     |                                      | 1σ                                  | 1σ  |                                     |    |      |   |      |
|          |         |         |                 |                                      |                                     |        |                                     |        |                                      |                                     |     | 1σ                                  | 1σ |      |   |      |
| 53       | 27      | 79      | 0.34            | 0.0569                               | 0.0057                              | 0.2154 | 0.0197                              | 0.0292 | 0.0012                               | 487                                 | 219 | 198                                 | 16 | 185  | 8 | 93   |
| 50       | 92      | 20      | 0.44            | 0.0520                               | 0.0033                              | 0.2087 | 0.0125                              | 0.0293 | 0.0009                               | 287                                 | 117 | 192                                 | 10 | 186  | 6 | 96   |
|          |         | 9       |                 |                                      | 25                                  |        | 09                                  |        | 7                                    |                                     |     |                                     |    |      |   |      |
| 51       | 22      | 35      | 0.65            | 0.0462                               | 0.0022                              | 0.1882 | 0.0089                              | 0.0294 | 0.0009                               | 9.4                                 | 111 | 175                                 | 8  | 187  | 5 | 93   |
|          | 9       | 0       |                 |                                      | 22                                  |        | 89                                  |        | 09                                   |                                     | 1   |                                     |    |      |   |      |
| 13       | 56      | 38      | 1.44            | 0.0505                               | 0.0023                              | 0.2068 | 0.0090                              | 0.0297 | 0.0008                               | 220                                 | 99  | 191                                 | 8  | 188  | 5 | 98   |
|          | 1       | 9       |                 |                                      | 23                                  |        | 90                                  |        | 08                                   |                                     | 220 |                                     |    |      |   |      |
| 22       | 14      | 17      | 0.83            | 0.0559                               | 0.0036                              | 0.2254 | 0.0135                              | 0.0297 | 0.0009                               | 450                                 | 144 | 206                                 | 11 | 189  | 6 | 91   |
|          | 3       | 3       |                 |                                      | 36                                  |        | 35                                  |        | 09                                   |                                     | 4   |                                     |    |      |   |      |
| 64       | 39      | 58      | 0.68            | 0.0541                               | 0.0026                              | 0.2241 | 0.0104                              | 0.0299 | 0.0009                               | 372                                 | 106 | 205                                 | 9  | 190  | 6 | 92   |
|          | 6       | 6       |                 |                                      | 26                                  |        | 04                                  |        | 09                                   |                                     | 6   |                                     |    |      |   |      |
| 25       | 15      | 27      | 0.54            | 0.0555                               | 0.0028                              | 0.2287 | 0.0112                              | 0.0300 | 0.0009                               | 432                                 | 111 | 209                                 | 9  | 191  | 6 | 90   |
|          | 0       | 5       |                 |                                      | 28                                  |        | 12                                  |        | 09                                   |                                     | 1   |                                     |    |      |   |      |
| 10       | 15      | 23      | 0.68            | 0.0528                               | 0.0027                              | 0.2170 | 0.0107                              | 0.0301 | 0.0009                               | 320                                 | 117 | 199                                 | 9  | 191  | 6 | 95   |
|          | 7       | 2       |                 |                                      | 27                                  |        | 07                                  |        | 09                                   |                                     | 7   |                                     |    |      |   |      |
| 28       | 95      | 138     | 0.69            | 0.0512                               | 0.0034                              | 0.2089 | 0.0133                              | 0.0303 | 0.0010                               | 256                                 | 145 | 193                                 | 11 | 192  | 6 | 99   |
|          |         |         |                 |                                      | 34                                  |        | 33                                  |        | 10                                   |                                     | 5   |                                     |    |      |   |      |
| 41       | 15      | 15      | 0.99            | 0.0477                               | 0.0036                              | 0.1969 | 0.0139                              | 0.0303 | 0.0010                               | 83.4                                | 170 | 182                                 | 12 | 193  | 6 | 94   |
|          | 3       | 4       |                 |                                      | 36                                  |        | 39                                  |        | 10                                   |                                     | 0   |                                     |    |      |   |      |
| 8        | 16      | 38      | 0.44            | 0.0498                               | 0.0025                              | 0.2094 | 0.0092                              | 0.0305 | 0.0009                               | 187                                 | 110 | 193                                 | 8  | 193  | 5 | 99   |
|          | 8       | 2       |                 |                                      | 25                                  |        | 92                                  |        | 09                                   |                                     | 0   |                                     |    |      |   |      |
| 91       | 13      | 14      | 0.94            | 0.0525                               | 0.0039                              | 0.2112 | 0.0143                              | 0.0306 | 0.0011                               | 309                                 | 175 | 195                                 | 12 | 194  | 7 | 99   |
|          | 9       | 8       |                 |                                      | 39                                  |        | 43                                  |        | 11                                   |                                     | 5   |                                     |    |      |   |      |
| 20       | 25      | 77      | 0.33            | 0.0552                               | 0.0023                              | 0.2351 | 0.0097                              | 0.0307 | 0.0009                               | 420                                 | 93  | 214                                 | 8  | 195  | 5 | 90   |
|          | 6       | 1       |                 |                                      | 23                                  |        | 97                                  |        | 09                                   |                                     | 93  |                                     |    |      |   |      |
| 68       | 20      | 39      | 0.52            | 0.0537                               | 0.0028                              | 0.2311 | 0.0128                              | 0.0308 | 0.0010                               | 367                                 | 117 | 211                                 | 11 | 196  | 6 | 92   |
|          | 6       | 3       |                 |                                      | 28                                  |        | 28                                  |        | 10                                   |                                     | 7   |                                     |    |      |   |      |
| 38       | 92      | 186     | 0.49            | 0.0553                               | 0.0038                              | 0.2348 | 0.0147                              | 0.0309 | 0.0010                               | 433                                 | 152 | 214                                 | 12 | 196  | 6 | 91   |
|          |         |         |                 |                                      | 38                                  |        | 47                                  |        | 10                                   |                                     | 2   |                                     |    |      |   |      |
| 79       | 23      | 52      | 0.44            | 0.0495                               | 0.0026                              | 0.2158 | 0.0107                              | 0.0314 | 0.0010                               | 169                                 | 129 | 198                                 | 9  | 199  | 6 | 99   |
|          | 3       | 8       |                 |                                      | 26                                  |        | 07                                  |        | 10                                   |                                     | 9   |                                     |    |      |   |      |
| 86       | 14      | 19      | 0.74            | 0.0533                               | 0.0044                              | 0.2246 | 0.0165                              | 0.0316 | 0.0011                               | 343                                 | 189 | 206                                 | 14 | 200  | 7 | 97   |
|          | 0       | 0       |                 |                                      | 44                                  |        | 65                                  |        | 11                                   |                                     | 9   |                                     |    |      |   |      |
| 58       | 88      | 118     | 0.74            | 0.0473                               | 0.0043                              | 0.2055 | 0.0178                              | 0.0317 | 0.0011                               | 64.9                                | 268 | 190                                 | 15 | 201  | 7 | 94   |
|          |         | 8       |                 |                                      | 43                                  |        | 78                                  |        | 11                                   |                                     | 8   |                                     |    |      |   |      |

| Spot | Th   | U    | Isotopic Ratios |                                      |                                     |        |                                     |        |                                      | Isotopic Ages (Ma)                  |     |                                     |    |      |     | Conc |
|------|------|------|-----------------|--------------------------------------|-------------------------------------|--------|-------------------------------------|--------|--------------------------------------|-------------------------------------|-----|-------------------------------------|----|------|-----|------|
|      | ppm  | ppm  | Th/U            | <sup>207</sup> Pb/ <sup>206</sup> Pb | <sup>207</sup> Pb/ <sup>235</sup> U |        | <sup>206</sup> Pb/ <sup>238</sup> U |        | <sup>207</sup> Pb/ <sup>206</sup> Pb | <sup>207</sup> Pb/ <sup>235</sup> U |     | <sup>206</sup> Pb/ <sup>238</sup> U |    | Disc | e % |      |
|      |      |      |                 |                                      | 1σ                                  | 1σ     | 1σ                                  | 1σ     |                                      | 1σ                                  | 1σ  |                                     |    |      |     |      |
|      |      |      |                 |                                      |                                     |        |                                     |        |                                      |                                     |     |                                     |    |      |     |      |
| 2    | 153  | 294  | 0.52            | 0.0529                               | 0.0025                              | 0.2390 | 0.0108                              | 0.0327 | 0.0009                               | 324                                 | 110 | 218                                 | 9  | 207  | 6   | 95   |
| 15   | 145  | 218  | 0.67            | 0.0527                               | 0.0026                              | 0.2377 | 0.0112                              | 0.0327 | 0.0010                               | 322                                 | 118 | 217                                 | 9  | 208  | 6   | 95   |
|      | 58   | 266  |                 |                                      | 0.0112                              |        | 0.0010                              |        |                                      |                                     |     |                                     |    |      |     |      |
| 87   | 667  | 167  | 0.39            | 0.0507                               | 0.0036                              | 0.2298 | 0.0150                              | 0.0330 | 0.0010                               | 228                                 | 167 | 210                                 | 12 | 210  | 6   | 99   |
|      |      | 7    |                 |                                      | 36                                  |        | 50                                  |        | 10                                   |                                     | 7   |                                     |    |      |     |      |
| 74   | 621  | 101  | 0.61            | 0.0525                               | 0.0046                              | 0.2331 | 0.0185                              | 0.0333 | 0.0012                               | 309                                 | 198 | 213                                 | 15 | 211  | 8   | 99   |
|      |      | 1    |                 |                                      | 46                                  |        | 85                                  |        | 12                                   |                                     | 8   |                                     |    |      |     |      |
| 96   | 175  | 494  | 0.35            | 0.0530                               | 0.0025                              | 0.2629 | 0.0117                              | 0.0362 | 0.0011                               | 332                                 | 106 | 237                                 | 9  | 229  | 7   | 96   |
|      |      |      |                 |                                      | 4                                   |        | 25                                  |        | 17                                   |                                     | 11  |                                     |    |      |     |      |
| 89   | 324  | 533  | 0.61            | 0.0545                               | 0.0031                              | 0.2726 | 0.0147                              | 0.0362 | 0.0011                               | 391                                 | 132 | 245                                 | 12 | 229  | 7   | 93   |
|      |      |      |                 |                                      | 3                                   |        | 31                                  |        | 47                                   |                                     | 11  |                                     |    |      |     |      |
| 71   | 205  | 764  | 0.27            | 0.0526                               | 0.0021                              | 0.2787 | 0.0103                              | 0.0385 | 0.0011                               | 309                                 | 125 | 250                                 | 8  | 243  | 7   | 97   |
|      |      |      |                 |                                      | 4                                   |        | 21                                  |        | 03                                   |                                     | 11  |                                     |    |      |     |      |
| 62   | 535  | 658  | 0.81            | 0.0524                               | 0.0021                              | 0.2797 | 0.0111                              | 0.0385 | 0.0011                               | 306                                 | 93  | 250                                 | 9  | 244  | 7   | 97   |
|      |      |      |                 |                                      | 5                                   |        | 21                                  |        | 11                                   |                                     | 11  |                                     |    |      |     |      |
| 17   | 199  | 388  | 0.51            | 0.0534                               | 0.0025                              | 0.3009 | 0.0147                              | 0.0403 | 0.0011                               | 346                                 | 107 | 267                                 | 12 | 255  | 7   | 95   |
|      |      |      |                 |                                      | 8                                   |        | 25                                  |        | 47                                   |                                     | 11  |                                     |    |      |     |      |
| 63   | 686  | 166  | 0.41            | 0.0563                               | 0.0032                              | 0.3602 | 0.0200                              | 0.0466 | 0.0015                               | 465                                 | 126 | 312                                 | 15 | 293  | 9   | 93   |
|      |      |      |                 |                                      | 6                                   |        | 32                                  |        | 00                                   |                                     | 15  |                                     |    |      |     |      |
| 59   | 173  | 580  | 0.30            | 0.0516                               | 0.0020                              | 0.4631 | 0.0219                              | 0.0640 | 0.0024                               | 265                                 | 87  | 386                                 | 15 | 400  | 14  | 96   |
|      |      |      |                 |                                      | 0                                   |        | 20                                  |        | 19                                   |                                     | 24  |                                     |    |      |     |      |
| 66   | 281  | 1428 | 0.20            | 0.0562                               | 0.0020                              | 0.5677 | 0.0205                              | 0.0728 | 0.0022                               | 461                                 | 106 | 457                                 | 13 | 453  | 13  | 99   |
|      |      |      |                 |                                      | 1                                   |        | 20                                  |        | 05                                   |                                     | 22  |                                     |    |      |     |      |
| 69   | 888  | 338  | 0.26            | 0.0624                               | 0.0030                              | 0.6432 | 0.0305                              | 0.0752 | 0.0022                               | 687                                 | 99  | 504                                 | 19 | 467  | 13  | 92   |
|      |      |      |                 |                                      | 8                                   |        | 30                                  |        | 05                                   |                                     | 22  |                                     |    |      |     |      |
| 65   | 670  | 2671 | 0.25            | 0.0585                               | 0.0020                              | 0.6348 | 0.0222                              | 0.0782 | 0.0022                               | 546                                 | 78  | 499                                 | 14 | 485  | 13  | 97   |
|      |      |      |                 |                                      | 0                                   |        | 20                                  |        | 22                                   |                                     | 22  |                                     |    |      |     |      |
| 83   | 57   | 88   | 0.64            | 0.0584                               | 0.0061                              | 0.3303 | 0.0336                              | 0.0407 | 0.0015                               | 546                                 | 230 | 290                                 | 26 | 257  | 9   | 88   |
| 9    | 50   | 106  | 0.47            | 0.0599                               | 0.0062                              | 0.2382 | 0.0218                              | 0.0299 | 0.0011                               | 611                                 | 223 | 217                                 | 18 | 190  | 7   | 86   |
|      |      |      |                 |                                      | 6                                   |        | 62                                  |        | 18                                   |                                     | 11  |                                     |    |      |     |      |
| 14   | 1435 | 876  | 1.64            | 0.0646                               | 0.0024                              | 0.3037 | 0.0114                              | 0.0338 | 0.0009                               | 761                                 | 80  | 269                                 | 9  | 214  | 6   | 77   |
|      |      |      |                 |                                      | 35                                  |        | 24                                  |        | 14                                   |                                     | 09  |                                     |    |      |     |      |
| 31   | 47   | 78   | 0.61            | 0.0702                               | 0.0105                              | 0.2460 | 0.0271                              | 0.0276 | 0.0011                               | 1000                                | 313 | 223                                 | 22 | 175  | 7   | 75   |

| Sp<br>ot                         | Th       | U        | Isotopic Ratios |                                         |                                 |        |                                 |        |                                                     | Isotopic Ages (Ma)              |         |                                 |        |        |        | Conc   |
|----------------------------------|----------|----------|-----------------|-----------------------------------------|---------------------------------|--------|---------------------------------|--------|-----------------------------------------------------|---------------------------------|---------|---------------------------------|--------|--------|--------|--------|
|                                  | ppm      | ppm      | Th/<br>U        | <sup>207</sup> Pb/<br><sup>206</sup> Pb | <sup>207</sup> Pb/ <sup>2</sup> |        | <sup>206</sup> Pb/ <sup>2</sup> |        | <sup>207</sup> Pb/ <sup>20</sup><br><sup>6</sup> Pb | <sup>207</sup> Pb/ <sup>2</sup> |         | <sup>206</sup> Pb/ <sup>2</sup> |        | 1<br>σ | 1<br>σ | e<br>% |
|                                  |          |          |                 |                                         | <sup>35</sup> U                 | 1σ     | <sup>38</sup> U                 | 1σ     |                                                     | <sup>35</sup> U                 | 1<br>σ  | <sup>38</sup> U                 | 1<br>σ |        |        |        |
|                                  |          |          |                 |                                         |                                 |        |                                 |        |                                                     |                                 |         |                                 |        |        |        |        |
| 94                               | 33<br>9  | 76<br>7  | 0.44            | 0.0672                                  | 0.00<br>44                      | 0.2509 | 0.01<br>56                      | 0.0275 | 0.00<br>10                                          | 856                             | 13<br>6 | 227                             | 13     | 175    | 6      | 73     |
| 88                               | 12<br>67 | 20<br>08 | 0.63            | 0.0849                                  | 0.00<br>31                      | 0.7527 | 0.02<br>66                      | 0.0639 | 0.00<br>19                                          | 1314                            | 70      | 570                             | 15     | 400    | 11     | 64     |
| 33                               | 60       | 57       | 1.04            | 0.0789                                  | 0.00<br>67                      | 0.3534 | 0.02<br>72                      | 0.0330 | 0.00<br>12                                          | 1169                            | 16<br>9 | 307                             | 20     | 209    | 8      | 62     |
| 21                               | 91<br>4  | 77<br>0  | 1.19            | 0.0833                                  | 0.00<br>31                      | 0.3975 | 0.01<br>49                      | 0.0344 | 0.00<br>10                                          | 1276                            | 72      | 340                             | 11     | 218    | 6      | 56     |
| 70                               | 28<br>1  | 90<br>1  | 0.31            | 0.0871                                  | 0.00<br>42                      | 0.4969 | 0.02<br>37                      | 0.0413 | 0.00<br>12                                          | 1365                            | 88      | 410                             | 16     | 261    | 8      | 55     |
| 85                               | 94       | 10<br>2  | 0.92            | 0.0924                                  | 0.00<br>98                      | 0.2408 | 0.02<br>19                      | 0.0211 | 0.00<br>08                                          | 1476                            | 20<br>2 | 219                             | 18     | 135    | 5      | 52     |
| 47                               | 34<br>99 | 38<br>84 | 0.90            | 0.2483                                  | 0.00<br>94                      | 0.7739 | 0.03<br>40                      | 0.0222 | 0.00<br>07                                          | 3174                            | 60      | 582                             | 19     | 142    | 4      | 22     |
| 27                               | 19<br>50 | 11<br>38 | 1.71            | 0.1769                                  | 0.00<br>67                      | 0.5399 | 0.01<br>93                      | 0.0225 | 0.00<br>07                                          | 2624                            | 64      | 438                             | 13     | 144    | 5      | 2      |
| 44                               | 49<br>22 | 28<br>91 | 1.70            | 0.2589                                  | 0.00<br>92                      | 1.0714 | 0.03<br>96                      | 0.0299 | 0.00<br>09                                          | 3240                            | 56      | 739                             | 19     | 190    | 6      | 19     |
| 93                               | 77<br>5  | 61<br>7  | 1.26            | 0.1414                                  | 0.00<br>83                      | 0.5308 | 0.02<br>69                      | 0.0291 | 0.00<br>10                                          | 2256                            | 10<br>1 | 432                             | 18     | 185    | 6      | 19     |
| 43                               | 64<br>2  | 45<br>1  | 1.42            | 0.1412                                  | 0.00<br>67                      | 0.5901 | 0.02<br>48                      | 0.0302 | 0.00<br>09                                          | 2243                            | 82      | 471                             | 16     | 192    | 6      | 15     |
| 60                               | 62       | 19<br>9  | 0.31            | 0.1956                                  | 0.01<br>15                      | 1.0576 | 0.06<br>56                      | 0.0384 | 0.00<br>12                                          | 2790                            | 96      | 733                             | 32     | 243    | 8      | 1      |
| JX12-3                      Kzh² |          |          |                 |                                         |                                 |        |                                 |        |                                                     |                                 |         |                                 |        |        |        |        |
| 26                               | 86       | 19<br>2  | 0.45            | 0.0699                                  | 0.02<br>08                      | 0.0910 | 0.02<br>32                      | 0.0127 | 0.00<br>08                                          | 928                             | 64<br>4 | 88.4                            | 22     | 81     | 5      | 91     |
| 3                                | 66       | 20<br>6  | 0.32            | 0.0549                                  | 0.00<br>95                      | 0.1023 | 0.01<br>51                      | 0.0141 | 0.00<br>07                                          | 409                             | 35<br>7 | 98.9                            | 14     | 90     | 4      | 91     |
| 5                                | 43<br>8  | 85<br>0  | 0.52            | 0.0524                                  | 0.00<br>46                      | 0.1035 | 0.00<br>89                      | 0.0143 | 0.00<br>05                                          | 302                             | 20<br>6 | 100.0                           | 8      | 92     | 3      | 91     |
| 70                               | 14<br>8  | 51<br>5  | 0.29            | 0.0525                                  | 0.00<br>49                      | 0.0984 | 0.00<br>84                      | 0.0143 | 0.00<br>05                                          | 306                             | 21<br>3 | 95.3                            | 8      | 92     | 3      | 96     |
| 85                               | 14<br>1  | 36<br>7  | 0.38            | 0.0519                                  | 0.00<br>72                      | 0.1043 | 0.01<br>46                      | 0.0145 | 0.00<br>06                                          | 283                             | 28<br>9 | 101                             | 13     | 93     | 4      | 91     |
| 47                               | 33<br>1  | 86<br>1  | 0.38            | 0.0523                                  | 0.00<br>42                      | 0.1072 | 0.00<br>83                      | 0.0146 | 0.00<br>05                                          | 298                             | 18<br>7 | 103                             | 8      | 94     | 3      | 90     |

| Sp<br>ot | Th      | U        | Isotopic Ratios |                                      |                                     |        |                                     |        |                                      | Isotopic Ages (Ma)                  |         |                                     |    |                | Conc |    |
|----------|---------|----------|-----------------|--------------------------------------|-------------------------------------|--------|-------------------------------------|--------|--------------------------------------|-------------------------------------|---------|-------------------------------------|----|----------------|------|----|
|          | PP<br>m | PP<br>m  | Th/<br>U        | <sup>207</sup> Pb/ <sup>206</sup> Pb | <sup>207</sup> Pb/ <sup>235</sup> U |        | <sup>206</sup> Pb/ <sup>238</sup> U |        | <sup>207</sup> Pb/ <sup>206</sup> Pb | <sup>207</sup> Pb/ <sup>235</sup> U |         | <sup>206</sup> Pb/ <sup>238</sup> U |    | Danc<br>e<br>% |      |    |
|          |         |          |                 |                                      | 1σ                                  | 1σ     | 1σ                                  | 1σ     |                                      | 1σ                                  | 1σ      |                                     |    |                |      |    |
|          |         |          |                 |                                      |                                     |        |                                     |        |                                      |                                     |         |                                     |    |                |      |    |
| 76       | 50<br>3 | 67<br>0  | 0.75            | 0.0484                               | 0.00<br>41                          | 0.0953 | 0.00<br>76                          | 0.0148 | 0.00<br>05                           | 117                                 | 18<br>9 | 92.4                                | 7  | 95             | 3    | 97 |
| 58       | 36<br>5 | 77<br>1  | 0.47            | 0.0521                               | 0.00<br>53                          | 0.1083 | 0.01<br>05                          | 0.0149 | 0.00<br>06                           | 300                                 | 23<br>5 | 104                                 | 10 | 95             | 4    | 90 |
| 2        | 93      | 34<br>6  | 0.27            | 0.0535                               | 0.00<br>57                          | 0.1079 | 0.01<br>00                          | 0.0150 | 0.00<br>05                           | 350                                 | 23<br>8 | 104                                 | 9  | 96             | 3    | 91 |
| 30       | 33<br>0 | 52<br>1  | 0.63            | 0.0501                               | 0.00<br>83                          | 0.1092 | 0.01<br>77                          | 0.0150 | 0.00<br>07                           | 198                                 | 34<br>4 | 105                                 | 16 | 96             | 4    | 90 |
| 71       | 65<br>1 | 87<br>6  | 0.74            | 0.0544                               | 0.00<br>42                          | 0.1110 | 0.00<br>79                          | 0.0151 | 0.00<br>05                           | 387                                 | 16<br>9 | 107                                 | 7  | 97             | 3    | 90 |
| 84       | 27<br>2 | 38<br>9  | 0.70            | 0.0530                               | 0.00<br>67                          | 0.1036 | 0.01<br>18                          | 0.0152 | 0.00<br>06                           | 328                                 | 28<br>9 | 100                                 | 11 | 97             | 4    | 96 |
| 19       | 19<br>7 | 25<br>5  | 0.77            | 0.0555                               | 0.00<br>78                          | 0.1087 | 0.01<br>49                          | 0.0152 | 0.00<br>06                           | 432                                 | 31<br>8 | 105                                 | 14 | 97             | 4    | 92 |
| 29       | 18<br>6 | 44<br>6  | 0.42            | 0.0538                               | 0.00<br>57                          | 0.1100 | 0.01<br>11                          | 0.0153 | 0.00<br>06                           | 365                                 | 24<br>1 | 106                                 | 10 | 98             | 4    | 92 |
| 23       | 22<br>5 | 36<br>2  | 0.62            | 0.0539                               | 0.00<br>59                          | 0.1103 | 0.01<br>03                          | 0.0160 | 0.00<br>06                           | 365                                 | 25<br>0 | 106                                 | 9  | 102            | 4    | 96 |
| 46       | 63      | 12<br>2  | 0.52            | 0.0724                               | 0.01<br>92                          | 0.1139 | 0.02<br>74                          | 0.0160 | 0.00<br>11                           | 998                                 | 56<br>0 | 110                                 | 25 | 102            | 7    | 93 |
| 15       | 43<br>5 | 27<br>9  | 1.56            | 0.0579                               | 0.00<br>74                          | 0.1173 | 0.01<br>37                          | 0.0160 | 0.00<br>07                           | 528                                 | 28<br>1 | 113                                 | 12 | 102            | 4    | 90 |
| 100      | 13<br>7 | 33<br>0  | 0.42            | 0.0555                               | 0.00<br>58                          | 0.1184 | 0.01<br>22                          | 0.0161 | 0.00<br>06                           | 432                                 | 22<br>9 | 114                                 | 11 | 103            | 4    | 90 |
| 32       | 32<br>7 | 57<br>8  | 0.57            | 0.0512                               | 0.00<br>39                          | 0.1119 | 0.00<br>80                          | 0.0162 | 0.00<br>05                           | 250                                 | 17<br>6 | 108                                 | 7  | 103            | 3    | 95 |
| 82       | 32<br>3 | 33<br>5  | 0.96            | 0.0544                               | 0.00<br>57                          | 0.1219 | 0.01<br>22                          | 0.0171 | 0.00<br>06                           | 391                                 | 20<br>5 | 117                                 | 11 | 109            | 4    | 93 |
| 12       | 32<br>8 | 47<br>1  | 0.70            | 0.0511                               | 0.00<br>44                          | 0.1341 | 0.01<br>08                          | 0.0199 | 0.00<br>07                           | 256                                 | 19<br>8 | 128                                 | 10 | 127            | 4    | 99 |
| 49       | 64<br>0 | 18<br>13 | 0.35            | 0.0521                               | 0.00<br>31                          | 0.1906 | 0.01<br>08                          | 0.0258 | 0.00<br>08                           | 300                                 | 13<br>5 | 177                                 | 9  | 164            | 5    | 92 |
| 36       | 59<br>3 | 46<br>9  | 1.27            | 0.0560                               | 0.00<br>43                          | 0.1974 | 0.01<br>39                          | 0.0268 | 0.00<br>09                           | 450                                 | 14<br>1 | 183                                 | 12 | 171            | 6    | 93 |
| 21       | 26<br>4 | 24<br>2  | 1.09            | 0.0585                               | 0.00<br>56                          | 0.2055 | 0.01<br>82                          | 0.0270 | 0.00<br>10                           | 546                                 | 21<br>3 | 190                                 | 15 | 172            | 6    | 90 |

| Sp<br>ot | Th      | U       | Isotopic Ratios |                                      |                                     |        |                                     |        |                                      | Isotopic Ages (Ma)                  |         |                                     |    |      | Conc |    |
|----------|---------|---------|-----------------|--------------------------------------|-------------------------------------|--------|-------------------------------------|--------|--------------------------------------|-------------------------------------|---------|-------------------------------------|----|------|------|----|
|          | PP<br>m | PP<br>m | Th/<br>U        | <sup>207</sup> Pb/ <sup>206</sup> Pb | <sup>207</sup> Pb/ <sup>235</sup> U |        | <sup>206</sup> Pb/ <sup>238</sup> U |        | <sup>207</sup> Pb/ <sup>206</sup> Pb | <sup>207</sup> Pb/ <sup>235</sup> U |         | <sup>206</sup> Pb/ <sup>238</sup> U |    | Danc |      |    |
|          |         |         |                 |                                      | 1σ                                  | 1σ     | 1σ                                  | 1σ     |                                      | 1σ                                  | 1σ      |                                     |    |      |      |    |
|          |         |         |                 |                                      |                                     |        |                                     |        |                                      |                                     |         | 1σ                                  | 1σ |      |      |    |
| 68       | 21<br>6 | 24<br>4 | 0.88            | 0.0583                               | 0.00<br>63                          | 0.2052 | 0.01<br>97                          | 0.0270 | 0.00<br>10                           | 543                                 | 24<br>0 | 190                                 | 17 | 172  | 6    | 90 |
| 35       | 53<br>0 | 54<br>7 | 0.97            | 0.0503                               | 0.00<br>36                          | 0.1887 | 0.01<br>25                          | 0.0271 | 0.00<br>09                           | 206                                 | 16<br>7 | 176                                 | 11 | 172  | 5    | 98 |
| 55       | 32<br>2 | 36<br>5 | 0.88            | 0.0487                               | 0.00<br>51                          | 0.1824 | 0.01<br>70                          | 0.0275 | 0.00<br>10                           | 132                                 | 23<br>0 | 170                                 | 15 | 175  | 6    | 97 |
| 38       | 56<br>4 | 45<br>1 | 1.25            | 0.0537                               | 0.00<br>42                          | 0.2021 | 0.01<br>39                          | 0.0276 | 0.00<br>09                           | 367                                 | 17<br>6 | 187                                 | 12 | 176  | 6    | 93 |
| 41       | 38<br>3 | 88<br>1 | 0.44            | 0.0540                               | 0.00<br>41                          | 0.2108 | 0.01<br>47                          | 0.0281 | 0.00<br>10                           | 372                                 | 16<br>8 | 194                                 | 12 | 179  | 6    | 91 |
| 96       | 11<br>6 | 32<br>0 | 0.36            | 0.0541                               | 0.00<br>52                          | 0.2150 | 0.02<br>02                          | 0.0291 | 0.00<br>10                           | 376                                 | 21<br>7 | 198                                 | 17 | 185  | 6    | 93 |
| 61       | 15<br>5 | 23<br>3 | 0.67            | 0.0578                               | 0.00<br>57                          | 0.2189 | 0.01<br>90                          | 0.0291 | 0.00<br>10                           | 524                                 | 21<br>4 | 201                                 | 16 | 185  | 6    | 91 |
| 74       | 30<br>1 | 51<br>3 | 0.59            | 0.0559                               | 0.00<br>51                          | 0.2208 | 0.01<br>81                          | 0.0292 | 0.00<br>11                           | 456                                 | 20<br>4 | 203                                 | 15 | 185  | 7    | 91 |
| 86       | 38<br>1 | 40<br>6 | 0.94            | 0.0535                               | 0.00<br>49                          | 0.2134 | 0.01<br>85                          | 0.0294 | 0.00<br>11                           | 350                                 | 20<br>9 | 196                                 | 15 | 187  | 7    | 94 |
| 59       | 21<br>2 | 45<br>0 | 0.47            | 0.0508                               | 0.00<br>37                          | 0.2074 | 0.01<br>45                          | 0.0295 | 0.00<br>10                           | 235                                 | 16<br>8 | 191                                 | 12 | 188  | 6    | 97 |
| 52       | 32<br>2 | 42<br>7 | 0.75            | 0.0513                               | 0.00<br>41                          | 0.2208 | 0.01<br>71                          | 0.0298 | 0.00<br>10                           | 254                                 | 18<br>3 | 203                                 | 14 | 189  | 6    | 93 |
| 39       | 33<br>7 | 47<br>1 | 0.72            | 0.0474                               | 0.00<br>37                          | 0.1929 | 0.01<br>38                          | 0.0298 | 0.00<br>09                           | 77.9                                | 17<br>8 | 179                                 | 12 | 189  | 6    | 94 |
| 87       | 28<br>5 | 61<br>3 | 0.46            | 0.0555                               | 0.00<br>41                          | 0.2280 | 0.01<br>61                          | 0.0299 | 0.00<br>10                           | 432                                 | 16<br>3 | 209                                 | 13 | 190  | 6    | 90 |
| 54       | 26<br>2 | 42<br>6 | 0.62            | 0.0542                               | 0.00<br>49                          | 0.2300 | 0.01<br>92                          | 0.0300 | 0.00<br>11                           | 389                                 | 20<br>2 | 210                                 | 16 | 191  | 7    | 90 |
| 40       | 15<br>4 | 11<br>9 | 1.30            | 0.0561                               | 0.00<br>71                          | 0.2174 | 0.02<br>29                          | 0.0303 | 0.00<br>12                           | 457                                 | 28<br>3 | 200                                 | 19 | 192  | 7    | 96 |
| 81       | 50      | 13<br>9 | 0.36            | 0.0604                               | 0.00<br>96                          | 0.2307 | 0.02<br>97                          | 0.0303 | 0.00<br>13                           | 617                                 | 34<br>7 | 211                                 | 25 | 193  | 8    | 91 |
| 17       | 47<br>3 | 44<br>5 | 1.06            | 0.0563                               | 0.00<br>44                          | 0.2341 | 0.01<br>82                          | 0.0305 | 0.00<br>10                           | 465                                 | 17<br>4 | 214                                 | 15 | 194  | 7    | 90 |
| 93       | 18<br>4 | 30<br>3 | 0.61            | 0.0539                               | 0.00<br>52                          | 0.2363 | 0.02<br>18                          | 0.0315 | 0.00<br>11                           | 369                                 | 22<br>0 | 215                                 | 18 | 200  | 7    | 92 |



| Sp<br>ot | Th       | U        | Isotopic Ratios |                                      |                                     |        |                                     |        |                                      | Isotopic Ages (Ma)                  |         |                                     |    |                | Conc |    |
|----------|----------|----------|-----------------|--------------------------------------|-------------------------------------|--------|-------------------------------------|--------|--------------------------------------|-------------------------------------|---------|-------------------------------------|----|----------------|------|----|
|          | PP<br>m  | PP<br>m  | Th/<br>U        | <sup>207</sup> Pb/ <sup>206</sup> Pb | <sup>207</sup> Pb/ <sup>235</sup> U |        | <sup>206</sup> Pb/ <sup>238</sup> U |        | <sup>207</sup> Pb/ <sup>206</sup> Pb | <sup>207</sup> Pb/ <sup>235</sup> U |         | <sup>206</sup> Pb/ <sup>238</sup> U |    | Danc<br>e<br>% |      |    |
|          |          |          |                 |                                      | 1σ                                  | 1σ     | 1σ                                  | 1σ     |                                      | 1σ                                  | 1σ      |                                     |    |                |      |    |
|          |          |          |                 |                                      |                                     |        |                                     |        |                                      |                                     |         |                                     |    |                |      |    |
| 8        | 13<br>2  | 19<br>2  | 0.69            | 0.0608                               | 0.00<br>73                          | 0.2558 | 0.02<br>56                          | 0.0333 | 0.00<br>14                           | 632                                 | 26<br>0 | 231                                 | 21 | 211            | 9    | 90 |
| 37       | 12<br>2  | 21<br>9  | 0.56            | 0.0518                               | 0.00<br>48                          | 0.2442 | 0.02<br>15                          | 0.0348 | 0.00<br>12                           | 280                                 | 21<br>1 | 222                                 | 18 | 221            | 7    | 99 |
| 20       | 55<br>9  | 77<br>0  | 0.73            | 0.0560                               | 0.00<br>36                          | 0.2795 | 0.01<br>69                          | 0.0367 | 0.00<br>12                           | 454                                 | 14<br>3 | 250                                 | 13 | 232            | 7    | 92 |
| 10       | 32<br>0  | 48<br>3  | 0.66            | 0.0515                               | 0.00<br>34                          | 0.2757 | 0.01<br>75                          | 0.0384 | 0.00<br>12                           | 265                                 | 15<br>2 | 247                                 | 14 | 243            | 7    | 98 |
| 43       | 19<br>2  | 43<br>9  | 0.44            | 0.0539                               | 0.00<br>38                          | 0.2941 | 0.01<br>92                          | 0.0395 | 0.00<br>13                           | 365                                 | 16<br>3 | 262                                 | 15 | 250            | 8    | 95 |
| 72       | 20<br>6  | 74<br>8  | 0.28            | 0.0511                               | 0.00<br>29                          | 0.2809 | 0.01<br>53                          | 0.0397 | 0.00<br>12                           | 256                                 | 13<br>1 | 251                                 | 12 | 251            | 7    | 99 |
| 16       | 45       | 10<br>8  | 0.42            | 0.0628                               | 0.01<br>39                          | 0.3143 | 0.06<br>75                          | 0.0400 | 0.00<br>23                           | 702                                 | 49<br>2 | 278                                 | 52 | 253            | 14   | 90 |
| 25       | 34<br>8  | 11<br>51 | 0.30            | 0.0530                               | 0.00<br>31                          | 0.2981 | 0.01<br>71                          | 0.0401 | 0.00<br>13                           | 328                                 | 13<br>5 | 265                                 | 13 | 253            | 8    | 95 |
| 53       | 11<br>19 | 98<br>0  | 1.14            | 0.0495                               | 0.00<br>31                          | 0.2939 | 0.01<br>69                          | 0.0413 | 0.00<br>12                           | 169                                 | 14<br>4 | 262                                 | 13 | 261            | 8    | 99 |
| 91       | 19<br>9  | 41<br>1  | 0.49            | 0.0583                               | 0.00<br>42                          | 0.3822 | 0.02<br>51                          | 0.0476 | 0.00<br>15                           | 539                                 | 16<br>2 | 329                                 | 18 | 300            | 9    | 90 |
| 80       | 61       | 14<br>9  | 0.41            | 0.0614                               | 0.00<br>71                          | 0.3876 | 0.04<br>01                          | 0.0479 | 0.00<br>18                           | 654                                 | 25<br>0 | 333                                 | 29 | 302            | 11   | 90 |
| 24       | 34<br>4  | 99<br>6  | 0.35            | 0.0504                               | 0.00<br>29                          | 0.3433 | 0.01<br>97                          | 0.0488 | 0.00<br>15                           | 213                                 | 13<br>2 | 300                                 | 15 | 307            | 10   | 97 |
| 51       | 15<br>4  | 19<br>8  | 0.78            | 0.0581                               | 0.00<br>49                          | 0.4307 | 0.03<br>36                          | 0.0532 | 0.00<br>18                           | 532                                 | 18<br>3 | 364                                 | 24 | 334            | 11   | 91 |
| 31       | 69       | 19<br>3  | 0.36            | 0.0631                               | 0.00<br>48                          | 0.6143 | 0.04<br>43                          | 0.0712 | 0.00<br>25                           | 722                                 | 16<br>1 | 486                                 | 28 | 444            | 15   | 90 |
| 7        | 12<br>1  | 31<br>1  | 0.39            | 0.0606                               | 0.00<br>41                          | 0.6177 | 0.03<br>83                          | 0.0741 | 0.00<br>22                           | 633                                 | 14<br>4 | 488                                 | 24 | 461            | 13   | 94 |
| 73       | 26<br>1  | 54<br>2  | 0.48            | 0.0621                               | 0.00<br>31                          | 0.6423 | 0.03<br>20                          | 0.0743 | 0.00<br>22                           | 680                                 | 10<br>7 | 504                                 | 20 | 462            | 13   | 91 |
| 92       | 36<br>4  | 74<br>3  | 0.49            | 0.0555                               | 0.00<br>27                          | 0.6092 | 0.02<br>89                          | 0.0783 | 0.00<br>23                           | 432                                 | 10<br>9 | 483                                 | 18 | 486            | 14   | 99 |
| 48       | 10<br>0  | 19<br>7  | 0.51            | 0.0553                               | 0.00<br>39                          | 0.6328 | 0.04<br>13                          | 0.0828 | 0.00<br>26                           | 433                                 | 15<br>9 | 498                                 | 26 | 513            | 16   | 97 |

| Spot | Th/U |      | Th/U | Isotopic Ratios                      |                                     |        |                                     |        |                                      | Isotopic Ages (Ma) |                                     |      |                                     |      |    | Concordance % |
|------|------|------|------|--------------------------------------|-------------------------------------|--------|-------------------------------------|--------|--------------------------------------|--------------------|-------------------------------------|------|-------------------------------------|------|----|---------------|
|      | ppm  | ppm  |      | <sup>207</sup> Pb/ <sup>206</sup> Pb | <sup>207</sup> Pb/ <sup>235</sup> U |        | <sup>206</sup> Pb/ <sup>238</sup> U |        | <sup>207</sup> Pb/ <sup>206</sup> Pb |                    | <sup>207</sup> Pb/ <sup>235</sup> U |      | <sup>206</sup> Pb/ <sup>238</sup> U |      |    |               |
|      |      |      |      |                                      | 1σ                                  | 1σ     | 1σ                                  | 1σ     | 1σ                                   | 1σ                 | 1σ                                  | 1σ   |                                     |      |    |               |
|      |      |      |      |                                      |                                     |        |                                     |        |                                      |                    |                                     |      |                                     |      |    |               |
| 18   | 153  | 438  | 0.35 | 0.0544                               | 0.0030                              | 0.6167 | 0.0331                              | 0.0830 | 0.0025                               | 387                | 124                                 | 488  | 21                                  | 514  | 15 | 94            |
| 77   | 178  | 330  | 0.54 | 0.0566                               | 0.0033                              | 0.6481 | 0.0357                              | 0.0835 | 0.0026                               | 476                | 128                                 | 507  | 22                                  | 517  | 15 | 98            |
|      |      |      |      |                                      |                                     |        |                                     |        |                                      |                    |                                     |      |                                     |      |    |               |
| 50   | 34   | 70   | 0.48 | 0.0527                               | 0.0058                              | 0.6700 | 0.0707                              | 0.0910 | 0.0034                               | 317                | 245                                 | 521  | 43                                  | 561  | 20 | 92            |
|      |      |      |      |                                      |                                     |        |                                     |        |                                      |                    |                                     |      |                                     |      |    |               |
| 27   | 76   | 353  | 0.21 | 0.0654                               | 0.0037                              | 1.0368 | 0.0579                              | 0.1119 | 0.0035                               | 789                | 119                                 | 722  | 29                                  | 684  | 20 | 94            |
|      |      |      |      |                                      |                                     |        |                                     |        |                                      |                    |                                     |      |                                     |      |    |               |
| 33   | 131  | 1312 | 0.10 | 0.0659                               | 0.0030                              | 1.1762 | 0.0509                              | 0.1272 | 0.0037                               | 806                | 95                                  | 790  | 24                                  | 772  | 21 | 97            |
|      |      |      |      |                                      |                                     |        |                                     |        |                                      |                    |                                     |      |                                     |      |    |               |
| 57   | 129  | 164  | 0.79 | 0.0891                               | 0.0051                              | 3.0705 | 0.1688                              | 0.2408 | 0.0079                               | 1407               | 114                                 | 1425 | 42                                  | 1391 | 41 | 97            |
|      |      |      |      |                                      |                                     |        |                                     |        |                                      |                    |                                     |      |                                     |      |    |               |
| 1    | 99   | 257  | 0.39 | 0.0593                               | 0.0039                              | 0.3832 | 0.0247                              | 0.0471 | 0.0015                               | 576                | 147                                 | 329  | 18                                  | 297  | 9  | 89            |
|      |      |      |      |                                      |                                     |        |                                     |        |                                      |                    |                                     |      |                                     |      |    |               |
| 88   | 851  | 1598 | 0.53 | 0.0556                               | 0.0040                              | 0.2061 | 0.0129                              | 0.0266 | 0.0008                               | 435                | 127                                 | 190  | 11                                  | 169  | 5  | 88            |
|      |      |      |      |                                      |                                     |        |                                     |        |                                      |                    |                                     |      |                                     |      |    |               |
| 94   | 330  | 315  | 1.05 | 0.0594                               | 0.0068                              | 0.2420 | 0.0242                              | 0.0300 | 0.0014                               | 589                | 252                                 | 220  | 20                                  | 191  | 9  | 85            |
|      |      |      |      |                                      |                                     |        |                                     |        |                                      |                    |                                     |      |                                     |      |    |               |
| 99   | 66   | 116  | 0.57 | 0.0619                               | 0.0110                              | 0.2934 | 0.0606                              | 0.0344 | 0.0024                               | 672                | 387                                 | 261  | 48                                  | 218  | 15 | 82            |
|      |      |      |      |                                      |                                     |        |                                     |        |                                      |                    |                                     |      |                                     |      |    |               |
| 75   | 218  | 259  | 0.84 | 0.0672                               | 0.0064                              | 0.4670 | 0.0416                              | 0.0512 | 0.0021                               | 856                | 200                                 | 389  | 29                                  | 322  | 13 | 81            |
|      |      |      |      |                                      |                                     |        |                                     |        |                                      |                    |                                     |      |                                     |      |    |               |
| 34   | 177  | 142  | 1.24 | 0.0663                               | 0.0106                              | 0.2596 | 0.0342                              | 0.0296 | 0.0016                               | 817                | 341                                 | 234  | 28                                  | 188  | 10 | 78            |
|      |      |      |      |                                      |                                     |        |                                     |        |                                      |                    |                                     |      |                                     |      |    |               |
| 62   | 453  | 731  | 0.62 | 0.0630                               | 0.0045                              | 0.2167 | 0.0149                              | 0.0249 | 0.0008                               | 709                | 151                                 | 199  | 12                                  | 159  | 5  | 77            |
|      |      |      |      |                                      |                                     |        |                                     |        |                                      |                    |                                     |      |                                     |      |    |               |
| 66   | 606  | 656  | 0.92 | 0.0655                               | 0.0046                              | 0.2736 | 0.0190                              | 0.0301 | 0.0010                               | 791                | 148                                 | 246  | 15                                  | 191  | 6  | 75            |
|      |      |      |      |                                      |                                     |        |                                     |        |                                      |                    |                                     |      |                                     |      |    |               |
| 42   | 55   | 91   | 0.60 | 0.0940                               | 0.0299                              | 0.1418 | 0.0301                              | 0.0157 | 0.0013                               | 1509               | 634                                 | 135  | 27                                  | 100  | 8  | 70            |
|      |      |      |      |                                      |                                     |        |                                     |        |                                      |                    |                                     |      |                                     |      |    |               |
| 69   | 179  | 483  | 0.37 | 0.0710                               | 0.0047                              | 0.3617 | 0.0240                              | 0.0364 | 0.0012                               | 967                | 135                                 | 313  | 18                                  | 230  | 7  | 69            |
|      |      |      |      |                                      |                                     |        |                                     |        |                                      |                    |                                     |      |                                     |      |    |               |
| 79   | 311  | 493  | 0.63 | 0.0711                               | 0.0059                              | 0.2493 | 0.0197                              | 0.0259 | 0.0009                               | 961                | 167                                 | 226  | 16                                  | 165  | 5  | 68            |
|      |      |      |      |                                      |                                     |        |                                     |        |                                      |                    |                                     |      |                                     |      |    |               |
| 97   | 135  | 153  | 0.88 | 0.0803                               | 0.0102                              | 0.3137 | 0.0358                              | 0.0319 | 0.0014                               | 1203               | 253                                 | 277  | 28                                  | 202  | 9  | 68            |
|      |      |      |      |                                      |                                     |        |                                     |        |                                      |                    |                                     |      |                                     |      |    |               |

| Sp<br>ot | Th      | U       | Isotopic Ratios |                                      |                                     |        |                                     |        |                                      | Isotopic Ages (Ma)                  |     |                                     |    |      |    | Conc |
|----------|---------|---------|-----------------|--------------------------------------|-------------------------------------|--------|-------------------------------------|--------|--------------------------------------|-------------------------------------|-----|-------------------------------------|----|------|----|------|
|          | PP<br>m | PP<br>m | Th/<br>U        | <sup>207</sup> Pb/ <sup>206</sup> Pb | <sup>207</sup> Pb/ <sup>235</sup> U |        | <sup>206</sup> Pb/ <sup>238</sup> U |        | <sup>207</sup> Pb/ <sup>206</sup> Pb | <sup>207</sup> Pb/ <sup>235</sup> U |     | <sup>206</sup> Pb/ <sup>238</sup> U |    | Danc |    |      |
|          |         |         |                 |                                      | 1σ                                  | 1σ     | 1σ                                  | 1σ     |                                      | 1σ                                  | 1σ  |                                     |    |      |    |      |
|          |         |         |                 |                                      |                                     |        |                                     |        |                                      |                                     |     | 1σ                                  | 1σ |      | 1σ | 1σ   |
| 63       | 101     | 160     | 0.63            | 0.0743                               | 0.0108                              | 0.2407 | 0.0330                              | 0.0247 | 0.0012                               | 1050                                | 296 | 219                                 | 27 | 157  | 8  | 67   |
| 78       | 197     | 345     | 0.57            | 0.0747                               | 0.0087                              | 0.2565 | 0.0295                              | 0.0256 | 0.0010                               | 1061                                | 237 | 232                                 | 24 | 163  | 6  | 64   |
|          | 7       | 5       |                 |                                      | 87                                  |        | 95                                  |        | 10                                   |                                     | 7   |                                     |    |      |    |      |
| 56       | 434     | 439     | 0.99            | 0.0697                               | 0.0068                              | 0.1765 | 0.0165                              | 0.0179 | 0.0007                               | 920                                 | 202 | 165                                 | 14 | 115  | 4  | 63   |
|          | 4       | 9       |                 |                                      | 68                                  |        | 65                                  |        | 07                                   |                                     | 2   |                                     |    |      |    |      |
| 9        | 503     | 594     | 0.85            | 0.0730                               | 0.0068                              | 0.1356 | 0.0118                              | 0.0139 | 0.0005                               | 1013                                | 189 | 129                                 | 11 | 89   | 3  | 63   |
|          | 3       | 4       |                 |                                      | 68                                  |        | 18                                  |        | 05                                   |                                     | 9   |                                     |    |      |    |      |
| 60       | 842     | 242     | 0.35            | 0.0886                               | 0.0095                              | 0.3953 | 0.0358                              | 0.0351 | 0.0016                               | 1398                                | 207 | 338                                 | 26 | 222  | 10 | 58   |
| 14       | 991     | 75      | 1.33            | 0.0906                               | 0.0191                              | 0.3277 | 0.0677                              | 0.0282 | 0.0018                               | 1439                                | 411 | 288                                 | 52 | 179  | 11 | 53   |
| 4        | 1989    | 2444    | 0.81            | 0.0838                               | 0.0063                              | 0.3174 | 0.0220                              | 0.0271 | 0.0009                               | 1287                                | 142 | 280                                 | 17 | 173  | 6  | 52   |
| 64       | 117     | 12      | 0.97            | 0.1955                               | 0.0351                              | 0.6949 | 0.1070                              | 0.0304 | 0.0017                               | 2789                                | 298 | 536                                 | 64 | 193  | 11 | 5    |
|          | 7       | 0       |                 |                                      | 51                                  |        | 70                                  |        | 17                                   |                                     | 8   |                                     |    |      |    |      |
| 22       | 239     | 229     | 1.04            | 0.0942                               | 0.0072                              | 0.3993 | 0.0288                              | 0.0313 | 0.0011                               | 1522                                | 144 | 341                                 | 21 | 199  | 7  | 47   |
| 44       | 149     | 387     | 0.38            | 0.0902                               | 0.0089                              | 0.2317 | 0.0207                              | 0.0190 | 0.0008                               | 1431                                | 189 | 212                                 | 17 | 121  | 5  | 45   |
| 89       | 290     | 789     | 0.37            | 0.0880                               | 0.0081                              | 0.1773 | 0.0189                              | 0.0142 | 0.0006                               | 1383                                | 178 | 166                                 | 16 | 91   | 4  | 41   |
| 28       | 145     | 310     | 0.47            | 0.1010                               | 0.0122                              | 0.2077 | 0.0231                              | 0.0157 | 0.0007                               | 1643                                | 226 | 192                                 | 19 | 101  | 4  | 37   |
| 90       | 184     | 370     | 0.50            | 0.1019                               | 0.0101                              | 0.1989 | 0.0170                              | 0.0150 | 0.0007                               | 1658                                | 183 | 184                                 | 14 | 96   | 4  | 37   |
| 11       | 35      | 99      | 0.36            | 0.1731                               | 0.0548                              | 0.1598 | 0.0225                              | 0.0122 | 0.0007                               | 2588                                | 554 | 151                                 | 20 | 78   | 4  | 36   |
| 13       | 355     | 1214    | 0.29            | 0.1115                               | 0.0071                              | 0.2722 | 0.0173                              | 0.0178 | 0.0006                               | 1833                                | 116 | 244                                 | 14 | 114  | 4  | 27   |
| 98       | 57      | 117     | 0.49            | 0.1450                               | 0.0238                              | 0.4912 | 0.0638                              | 0.0281 | 0.0017                               | 2287                                | 286 | 406                                 | 43 | 178  | 11 | 22   |
| 65       | 90      | 160     | 0.56            | 0.1416                               | 0.0226                              | 0.3056 | 0.0379                              | 0.0177 | 0.0009                               | 2247                                | 279 | 271                                 | 29 | 113  | 6  | 17   |
| 6        | 148     | 402     | 0.37            | 0.2110                               | 0.0167                              | 0.4772 | 0.0350                              | 0.0168 | 0.0007                               | 2913                                | 124 | 396                                 | 24 | 107  | 4  | 15   |

| Spot                    | Th/U |      | Th/U | Isotopic Ratios                      |                                     |        |                                     |        |                                      | Isotopic Ages (Ma)                  |     |                                     |    |     |   | Concentration % |
|-------------------------|------|------|------|--------------------------------------|-------------------------------------|--------|-------------------------------------|--------|--------------------------------------|-------------------------------------|-----|-------------------------------------|----|-----|---|-----------------|
|                         | PPm  | PPm  |      | <sup>207</sup> Pb/ <sup>206</sup> Pb | <sup>207</sup> Pb/ <sup>235</sup> U |        | <sup>206</sup> Pb/ <sup>238</sup> U |        | <sup>207</sup> Pb/ <sup>206</sup> Pb | <sup>207</sup> Pb/ <sup>235</sup> U |     | <sup>206</sup> Pb/ <sup>238</sup> U |    |     |   |                 |
|                         |      |      |      |                                      | 1σ                                  | 1σ     | 1σ                                  | 1σ     |                                      | 1σ                                  | 1σ  |                                     |    |     |   |                 |
|                         |      |      |      |                                      |                                     |        |                                     |        |                                      |                                     |     |                                     |    |     |   |                 |
| 67                      | 169  | 209  | 0.81 | 0.2781                               | 0.0341                              | 0.9585 | 0.0852                              | 0.0293 | 0.0013                               | 3354                                | 193 | 683                                 | 44 | 186 | 8 | 15              |
| 83                      | 647  | 107  | 0.60 | 0.1620                               | 0.0266                              | 0.2553 | 0.0331                              | 0.0141 | 0.0008                               | 2476                                | 281 | 231                                 | 27 | 90  | 5 | 12              |
| JX12-4 Kzh <sup>2</sup> |      |      |      |                                      |                                     |        |                                     |        |                                      |                                     |     |                                     |    |     |   |                 |
| 79                      | 216  | 546  | 0.40 | 0.0495                               | 0.0043                              | 0.0911 | 0.0073                              | 0.0136 | 0.0005                               | 172                                 | 193 | 88.5                                | 7  | 87  | 3 | 98              |
| 78                      | 479  | 1020 | 0.47 | 0.0491                               | 0.0034                              | 0.0936 | 0.0060                              | 0.0139 | 0.0005                               | 150                                 | 156 | 90.8                                | 6  | 89  | 3 | 97              |
| 10                      | 172  | 651  | 0.26 | 0.0514                               | 0.0024                              | 0.1012 | 0.0044                              | 0.0140 | 0.0004                               | 257                                 | 107 | 97.9                                | 4  | 90  | 3 | 91              |
| 46                      | 139  | 290  | 0.48 | 0.0485                               | 0.0031                              | 0.0924 | 0.0051                              | 0.0142 | 0.0005                               | 120                                 | 144 | 89.7                                | 5  | 91  | 3 | 98              |
| 3                       | 118  | 429  | 0.27 | 0.0481                               | 0.0025                              | 0.0965 | 0.0049                              | 0.0146 | 0.0004                               | 105.6                               | 128 | 93.5                                | 4  | 94  | 3 | 99              |
| 65                      | 69   | 126  | 0.55 | 0.0513                               | 0.0057                              | 0.0999 | 0.0101                              | 0.0147 | 0.0005                               | 254                                 | 246 | 96.7                                | 9  | 94  | 3 | 97              |
| 50                      | 48   | 149  | 0.33 | 0.0568                               | 0.0069                              | 0.1076 | 0.0121                              | 0.0148 | 0.0006                               | 483                                 | 268 | 104                                 | 11 | 95  | 4 | 91              |
| 94                      | 125  | 147  | 0.84 | 0.0557                               | 0.0097                              | 0.1119 | 0.0111                              | 0.0149 | 0.0008                               | 443                                 | 193 | 108                                 | 19 | 95  | 5 | 87              |
| 85                      | 328  | 1081 | 0.30 | 0.0511                               | 0.0028                              | 0.1063 | 0.0054                              | 0.0149 | 0.0005                               | 243                                 | 121 | 103                                 | 5  | 95  | 3 | 92              |
| 24                      | 154  | 620  | 0.25 | 0.0475                               | 0.0024                              | 0.0980 | 0.0045                              | 0.0149 | 0.0004                               | 76.0                                | 115 | 94.9                                | 4  | 95  | 3 | 99              |
| 4                       | 531  | 925  | 0.57 | 0.0492                               | 0.0027                              | 0.1015 | 0.0056                              | 0.0150 | 0.0005                               | 167                                 | 125 | 98.2                                | 5  | 96  | 3 | 97              |
| 86                      | 107  | 507  | 0.21 | 0.0480                               | 0.0030                              | 0.0987 | 0.0058                              | 0.0150 | 0.0004                               | 98.2                                | 141 | 95.6                                | 5  | 96  | 3 | 99              |
| 39                      | 253  | 988  | 0.26 | 0.0477                               | 0.0021                              | 0.0992 | 0.0045                              | 0.0150 | 0.0004                               | 87.1                                | 96  | 96.1                                | 4  | 96  | 3 | 99              |
| 87                      | 418  | 1148 | 0.36 | 0.0550                               | 0.0025                              | 0.1159 | 0.0053                              | 0.0152 | 0.0004                               | 409                                 | 102 | 111                                 | 5  | 97  | 3 | 86              |
| 77                      | 40   | 147  | 0.27 | 0.0543                               | 0.0080                              | 0.1114 | 0.0058                              | 0.0152 | 0.0007                               | 383                                 | 333 | 107                                 | 14 | 97  | 4 | 90              |
| 42                      | 402  | 819  | 0.49 | 0.0468                               | 0.0024                              | 0.0978 | 0.0049                              | 0.0152 | 0.0005                               | 39.0                                | 115 | 94.7                                | 5  | 98  | 3 | 97              |

| Sp<br>ot | Th      | U       | Isotopic Ratios |                                      |                                     |        |                                     |        |                                      | Isotopic Ages (Ma)                  |     |                                     |   |      |   | Conc |
|----------|---------|---------|-----------------|--------------------------------------|-------------------------------------|--------|-------------------------------------|--------|--------------------------------------|-------------------------------------|-----|-------------------------------------|---|------|---|------|
|          | PP<br>m | PP<br>m | Th/<br>U        | <sup>207</sup> Pb/ <sup>206</sup> Pb | <sup>207</sup> Pb/ <sup>235</sup> U |        | <sup>206</sup> Pb/ <sup>238</sup> U |        | <sup>207</sup> Pb/ <sup>206</sup> Pb | <sup>207</sup> Pb/ <sup>235</sup> U |     | <sup>206</sup> Pb/ <sup>238</sup> U |   | Danc |   |      |
|          |         |         |                 |                                      | 1σ                                  | 1σ     | 1σ                                  | 1σ     |                                      | 1σ                                  | 1σ  |                                     |   |      |   |      |
|          |         |         |                 |                                      |                                     |        |                                     |        |                                      |                                     |     |                                     |   |      |   |      |
| 56       | 89      | 217     | 0.41            | 0.0495                               | 0.0044                              | 0.0997 | 0.0080                              | 0.0153 | 0.0005                               | 172                                 | 193 | 96.5                                | 7 | 98   | 3 | 98   |
| 41       | 270     | 457     | 0.59            | 0.0531                               | 0.0030                              | 0.1114 | 0.0058                              | 0.0153 | 0.0005                               | 345                                 | 123 | 107                                 | 5 | 98   | 3 | 90   |
|          |         |         |                 |                                      |                                     |        |                                     |        |                                      |                                     |     |                                     |   |      |   |      |
| 80       | 1143    | 2592    | 0.44            | 0.0505                               | 0.0022                              | 0.1078 | 0.0047                              | 0.0153 | 0.0004                               | 220                                 | 97  | 104                                 | 4 | 98   | 3 | 94   |
|          |         |         |                 |                                      |                                     |        |                                     |        |                                      |                                     |     |                                     |   |      |   |      |
| 21       | 288     | 1305    | 0.22            | 0.0486                               | 0.0020                              | 0.1031 | 0.0041                              | 0.0154 | 0.0004                               | 128                                 | 100 | 99.7                                | 4 | 99   | 3 | 98   |
|          |         |         |                 |                                      |                                     |        |                                     |        |                                      |                                     |     |                                     |   |      |   |      |
| 20       | 181     | 409     | 0.44            | 0.0499                               | 0.0029                              | 0.1049 | 0.0059                              | 0.0155 | 0.0005                               | 191                                 | 135 | 101                                 | 5 | 99   | 3 | 97   |
|          |         |         |                 |                                      |                                     |        |                                     |        |                                      |                                     |     |                                     |   |      |   |      |
| 13       | 204     | 389     | 0.52            | 0.0575                               | 0.0060                              | 0.1125 | 0.0090                              | 0.0155 | 0.0006                               | 522                                 | 231 | 108                                 | 8 | 99   | 4 | 91   |
|          |         |         |                 |                                      |                                     |        |                                     |        |                                      |                                     |     |                                     |   |      |   |      |
| 33       | 271     | 622     | 0.44            | 0.0556                               | 0.0031                              | 0.1163 | 0.0060                              | 0.0155 | 0.0005                               | 435                                 | 124 | 112                                 | 5 | 99   | 3 | 88   |
|          |         |         |                 |                                      |                                     |        |                                     |        |                                      |                                     |     |                                     |   |      |   |      |
| 27       | 474     | 371     | 1.28            | 0.0505                               | 0.0036                              | 0.1034 | 0.0068                              | 0.0155 | 0.0005                               | 217                                 | 168 | 99.9                                | 6 | 99   | 3 | 99   |
|          |         |         |                 |                                      |                                     |        |                                     |        |                                      |                                     |     |                                     |   |      |   |      |
| 12       | 243     | 390     | 0.62            | 0.0533                               | 0.0036                              | 0.1141 | 0.0079                              | 0.0155 | 0.0005                               | 343                                 | 149 | 110                                 | 7 | 99   | 3 | 90   |
|          |         |         |                 |                                      |                                     |        |                                     |        |                                      |                                     |     |                                     |   |      |   |      |
| 60       | 410     | 1645    | 0.25            | 0.0507                               | 0.0022                              | 0.1094 | 0.0048                              | 0.0156 | 0.0005                               | 228                                 | 102 | 105                                 | 4 | 100  | 3 | 94   |
|          |         |         |                 |                                      |                                     |        |                                     |        |                                      |                                     |     |                                     |   |      |   |      |
| 52       | 506     | 1468    | 0.34            | 0.0473                               | 0.0020                              | 0.1017 | 0.0042                              | 0.0156 | 0.0005                               | 64.9                                | 96  | 98.3                                | 4 | 100  | 3 | 98   |
|          |         |         |                 |                                      |                                     |        |                                     |        |                                      |                                     |     |                                     |   |      |   |      |
| 38       | 365     | 972     | 0.38            | 0.0465                               | 0.0022                              | 0.1001 | 0.0047                              | 0.0156 | 0.0005                               | 20.5                                | 111 | 96.9                                | 4 | 100  | 3 | 96   |
|          |         |         |                 |                                      |                                     |        |                                     |        |                                      |                                     |     |                                     |   |      |   |      |
| 11       | 99      | 158     | 0.63            | 0.0536                               | 0.0047                              | 0.1084 | 0.0083                              | 0.0157 | 0.0006                               | 354                                 | 200 | 104                                 | 8 | 100  | 4 | 95   |
|          |         |         |                 |                                      |                                     |        |                                     |        |                                      |                                     |     |                                     |   |      |   |      |
| 68       | 94      | 176     | 0.54            | 0.0505                               | 0.0047                              | 0.1064 | 0.0091                              | 0.0157 | 0.0006                               | 220                                 | 200 | 103                                 | 8 | 101  | 4 | 97   |
|          |         |         |                 |                                      |                                     |        |                                     |        |                                      |                                     |     |                                     |   |      |   |      |
| 19       | 452     | 1658    | 0.27            | 0.0491                               | 0.0020                              | 0.1065 | 0.0042                              | 0.0158 | 0.0005                               | 150                                 | 103 | 103                                 | 4 | 101  | 3 | 98   |
|          |         |         |                 |                                      |                                     |        |                                     |        |                                      |                                     |     |                                     |   |      |   |      |
| 28       | 320     | 1240    | 0.26            | 0.0502                               | 0.0022                              | 0.1094 | 0.0045                              | 0.0159 | 0.0005                               | 206                                 | 102 | 105                                 | 4 | 101  | 3 | 96   |
|          |         |         |                 |                                      |                                     |        |                                     |        |                                      |                                     |     |                                     |   |      |   |      |
| 25       | 223     | 688     | 0.32            | 0.0506                               | 0.0029                              | 0.1098 | 0.0063                              | 0.0159 | 0.0005                               | 220                                 | 133 | 106                                 | 6 | 102  | 3 | 96   |
|          |         |         |                 |                                      |                                     |        |                                     |        |                                      |                                     |     |                                     |   |      |   |      |
| 49       | 476     | 1344    | 0.35            | 0.0497                               | 0.0024                              | 0.1097 | 0.0053                              | 0.0160 | 0.0005                               | 189                                 | 113 | 106                                 | 5 | 102  | 3 | 96   |
|          |         |         |                 |                                      |                                     |        |                                     |        |                                      |                                     |     |                                     |   |      |   |      |

| Sp<br>ot | Th       | U        | Isotopic Ratios |                                      |                                     |        |                                     |        |                                      | Isotopic Ages (Ma)                  |         |                                     |    |                |   | Conc |
|----------|----------|----------|-----------------|--------------------------------------|-------------------------------------|--------|-------------------------------------|--------|--------------------------------------|-------------------------------------|---------|-------------------------------------|----|----------------|---|------|
|          | PP<br>m  | PP<br>m  | Th/<br>U        | <sup>207</sup> Pb/ <sup>206</sup> Pb | <sup>207</sup> Pb/ <sup>235</sup> U |        | <sup>206</sup> Pb/ <sup>238</sup> U |        | <sup>207</sup> Pb/ <sup>206</sup> Pb | <sup>207</sup> Pb/ <sup>235</sup> U |         | <sup>206</sup> Pb/ <sup>238</sup> U |    | Danc<br>e<br>% |   |      |
|          |          |          |                 |                                      | 1σ                                  | 1σ     | 1σ                                  | 1σ     |                                      | 1σ                                  | 1σ      |                                     |    |                |   |      |
|          |          |          |                 |                                      |                                     |        |                                     |        |                                      |                                     |         |                                     |    |                |   |      |
| 63       | 57<br>5  | 15<br>09 | 0.38            | 0.0517                               | 0.00<br>29                          | 0.1130 | 0.00<br>56                          | 0.0160 | 0.00<br>05                           | 333                                 | 97      | 109                                 | 5  | 102            | 3 | 94   |
| 48       | 11<br>1  | 36<br>6  | 0.30            | 0.0500                               | 0.00<br>39                          | 0.1089 | 0.00<br>80                          | 0.0160 | 0.00<br>06                           | 195                                 | 18      | 105                                 | 7  | 103            | 4 | 97   |
|          | 66       | 15<br>6  |                 |                                      | 18<br>8                             |        | 0.83                                |        | 0.0527                               |                                     |         |                                     |    |                |   |      |
| 84       | 91<br>4  | 36<br>4  | 0.25            | 0.0550                               | 0.00<br>44                          | 0.1229 | 0.01<br>00                          | 0.0165 | 0.00<br>06                           | 413                                 | 17<br>5 | 118                                 | 9  | 106            | 4 | 89   |
| 14       | 87<br>1  | 36<br>1  | 0.24            | 0.0558                               | 0.00<br>43                          | 0.1492 | 0.00<br>97                          | 0.0205 | 0.00<br>09                           | 443                                 | 17<br>0 | 141                                 | 9  | 131            | 6 | 92   |
| 2        | 14<br>9  | 81<br>3  | 0.18            | 0.0511                               | 0.00<br>22                          | 0.1455 | 0.00<br>59                          | 0.0206 | 0.00<br>06                           | 243                                 | 10<br>0 | 138                                 | 5  | 132            | 4 | 95   |
| 34       | 46<br>4  | 39<br>9  | 1.16            | 0.0519                               | 0.00<br>29                          | 0.1471 | 0.00<br>83                          | 0.0207 | 0.00<br>06                           | 280                                 | 16<br>0 | 139                                 | 7  | 132            | 4 | 94   |
| 26       | 10<br>48 | 56<br>5  | 1.86            | 0.0515                               | 0.00<br>26                          | 0.1702 | 0.00<br>89                          | 0.0236 | 0.00<br>07                           | 261                                 | 11<br>5 | 160                                 | 8  | 151            | 5 | 94   |
| 29       | 30<br>8  | 30<br>5  | 1.01            | 0.0551                               | 0.00<br>30                          | 0.2005 | 0.01<br>13                          | 0.0264 | 0.00<br>08                           | 413                                 | 12<br>2 | 186                                 | 10 | 168            | 5 | 90   |
| 8        | 57<br>2  | 11<br>25 | 0.51            | 0.0523                               | 0.00<br>21                          | 0.1925 | 0.00<br>72                          | 0.0268 | 0.00<br>08                           | 298                                 | 88      | 179                                 | 6  | 171            | 5 | 95   |
| 95       | 78<br>6  | 18<br>6  | 0.42            | 0.0473                               | 0.00<br>35                          | 0.1751 | 0.01<br>28                          | 0.0276 | 0.00<br>09                           | 61.2                                | 17<br>0 | 164                                 | 11 | 176            | 6 | 93   |
| 67       | 28<br>2  | 65<br>3  | 0.43            | 0.0512                               | 0.00<br>29                          | 0.1952 | 0.01<br>10                          | 0.0278 | 0.00<br>09                           | 256                                 | 12<br>5 | 181                                 | 9  | 176            | 6 | 97   |
| 76       | 37<br>1  | 42<br>4  | 0.87            | 0.0520                               | 0.00<br>31                          | 0.1999 | 0.01<br>16                          | 0.0281 | 0.00<br>09                           | 283                                 | 13<br>7 | 185                                 | 10 | 179            | 5 | 96   |
| 37       | 28<br>6  | 27<br>3  | 1.04            | 0.0530                               | 0.00<br>29                          | 0.2055 | 0.01<br>08                          | 0.0285 | 0.00<br>09                           | 328                                 | 12<br>9 | 190                                 | 9  | 181            | 5 | 95   |
| 36       | 42<br>73 | 78<br>73 | 0.53            | 0.0530                               | 0.00<br>73                          | 0.2263 | 0.02<br>73                          | 0.0285 | 0.00<br>12                           | 332                                 | 28<br>5 | 207                                 | 23 | 181            | 7 | 86   |
| 44       | 27<br>3  | 47<br>7  | 0.57            | 0.0476                               | 0.00<br>23                          | 0.1890 | 0.00<br>84                          | 0.0285 | 0.00<br>08                           | 79.7                                | 11<br>1 | 176                                 | 7  | 181            | 5 | 96   |
| 62       | 48<br>3  | 65<br>9  | 0.73            | 0.0464                               | 0.00<br>23                          | 0.1886 | 0.00<br>86                          | 0.0288 | 0.00<br>08                           | 16.8                                | 11<br>5 | 175                                 | 7  | 183            | 5 | 95   |
| 22       | 23<br>0  | 42<br>9  | 0.54            | 0.0492                               | 0.00<br>28                          | 0.2092 | 0.01<br>11                          | 0.0292 | 0.00<br>09                           | 167                                 | 13<br>3 | 193                                 | 9  | 185            | 6 | 95   |

| Spot | Th/U   |       | Isotopic Ratios |                                      |                                     |        |                                     |        |                                      | Isotopic Ages (Ma)                  |     |                                     |    |     |   | Concordance % |
|------|--------|-------|-----------------|--------------------------------------|-------------------------------------|--------|-------------------------------------|--------|--------------------------------------|-------------------------------------|-----|-------------------------------------|----|-----|---|---------------|
|      | Th/PPm | U/PPm | Th/U            | <sup>207</sup> Pb/ <sup>206</sup> Pb | <sup>207</sup> Pb/ <sup>235</sup> U |        | <sup>206</sup> Pb/ <sup>238</sup> U |        | <sup>207</sup> Pb/ <sup>206</sup> Pb | <sup>207</sup> Pb/ <sup>235</sup> U |     | <sup>206</sup> Pb/ <sup>238</sup> U |    |     |   |               |
|      |        |       |                 |                                      | 1σ                                  | 1σ     | 1σ                                  | 1σ     |                                      | 1σ                                  | 1σ  |                                     |    |     |   |               |
|      |        |       |                 |                                      |                                     |        |                                     |        |                                      |                                     |     |                                     |    |     |   |               |
| 58   | 1164   | 2026  | 0.57            | 0.0501                               | 0.0018                              | 0.2056 | 0.0077                              | 0.0296 | 0.0009                               | 198                                 | 79  | 190                                 | 6  | 188 | 5 | 99            |
| 69   | 191    | 321   | 0.59            | 0.0484                               | 0.0031                              | 0.1985 | 0.0130                              | 0.0297 | 0.0009                               | 117                                 | 144 | 184                                 | 11 | 189 | 6 | 97            |
|      | 1      | 1     |                 |                                      | 31                                  |        | 30                                  |        | 0                                    |                                     | 4   |                                     |    |     |   |               |
| 92   | 139    | 351   | 0.40            | 0.0546                               | 0.0029                              | 0.2242 | 0.0110                              | 0.0299 | 0.0009                               | 398                                 | 123 | 205                                 | 9  | 190 | 6 | 92            |
|      | 9      | 1     |                 |                                      | 29                                  |        | 10                                  |        | 0                                    |                                     | 3   |                                     |    |     |   |               |
| 57   | 184    | 728   | 0.25            | 0.0529                               | 0.0027                              | 0.2196 | 0.0113                              | 0.0299 | 0.0009                               | 324                                 | 115 | 202                                 | 9  | 190 | 6 | 94            |
|      | 4      | 8     |                 |                                      | 27                                  |        | 13                                  |        | 0                                    |                                     | 5   |                                     |    |     |   |               |
| 45   | 682    | 1158  | 0.59            | 0.0514                               | 0.0022                              | 0.2103 | 0.0086                              | 0.0300 | 0.0010                               | 257                                 | 94  | 194                                 | 7  | 191 | 6 | 98            |
|      | 2      | 58    |                 |                                      | 22                                  |        | 86                                  |        | 0                                    |                                     | 10  |                                     |    |     |   |               |
| 88   | 108    | 212   | 0.51            | 0.0546                               | 0.0034                              | 0.2250 | 0.0127                              | 0.0303 | 0.0010                               | 394                                 | 139 | 206                                 | 11 | 192 | 6 | 93            |
|      | 8      | 2     |                 |                                      | 34                                  |        | 27                                  |        | 0                                    |                                     | 9   |                                     |    |     |   |               |
| 17   | 117    | 167   | 0.70            | 0.0534                               | 0.0033                              | 0.2226 | 0.0131                              | 0.0308 | 0.0009                               | 346                                 | 134 | 204                                 | 11 | 196 | 6 | 95            |
|      | 7      | 7     |                 |                                      | 33                                  |        | 31                                  |        | 0                                    |                                     | 4   |                                     |    |     |   |               |
| 55   | 161    | 160   | 1.00            | 0.0485                               | 0.0040                              | 0.2055 | 0.0165                              | 0.0309 | 0.0010                               | 124                                 | 181 | 190                                 | 14 | 196 | 6 | 96            |
|      | 1      | 0     |                 |                                      | 40                                  |        | 65                                  |        | 0                                    |                                     | 1   |                                     |    |     |   |               |
| 54   | 119    | 280   | 0.43            | 0.0509                               | 0.0034                              | 0.2135 | 0.0127                              | 0.0310 | 0.0010                               | 239                                 | 154 | 196                                 | 11 | 197 | 6 | 99            |
|      | 9      | 0     |                 |                                      | 34                                  |        | 27                                  |        | 0                                    |                                     | 4   |                                     |    |     |   |               |
| 53   | 205    | 297   | 0.69            | 0.0534                               | 0.0028                              | 0.2245 | 0.0105                              | 0.0310 | 0.0009                               | 346                                 | 114 | 206                                 | 9  | 197 | 6 | 95            |
|      | 5      | 7     |                 |                                      | 28                                  |        | 05                                  |        | 0                                    |                                     | 4   |                                     |    |     |   |               |
| 59   | 235    | 404   | 0.58            | 0.0515                               | 0.0022                              | 0.2221 | 0.0096                              | 0.0312 | 0.0009                               | 265                                 | 100 | 204                                 | 8  | 198 | 6 | 97            |
|      | 5      | 4     |                 |                                      | 22                                  |        | 96                                  |        | 0                                    |                                     | 0   |                                     |    |     |   |               |
| 35   | 222    | 450   | 0.49            | 0.0515                               | 0.0024                              | 0.2340 | 0.0101                              | 0.0313 | 0.0009                               | 261                                 | 109 | 214                                 | 8  | 199 | 6 | 92            |
|      | 2      | 0     |                 |                                      | 24                                  |        | 01                                  |        | 0                                    |                                     | 9   |                                     |    |     |   |               |
| 51   | 161    | 654   | 0.25            | 0.0502                               | 0.0021                              | 0.2206 | 0.0091                              | 0.0317 | 0.0009                               | 206                                 | 96  | 202                                 | 8  | 201 | 6 | 99            |
|      | 1      | 4     |                 |                                      | 21                                  |        | 91                                  |        | 0                                    |                                     | 0   |                                     |    |     |   |               |
| 16   | 239    | 445   | 0.54            | 0.0504                               | 0.0025                              | 0.2212 | 0.0104                              | 0.0321 | 0.0009                               | 217                                 | 113 | 203                                 | 9  | 204 | 6 | 99            |
|      | 9      | 5     |                 |                                      | 25                                  |        | 04                                  |        | 0                                    |                                     | 3   |                                     |    |     |   |               |
| 72   | 146    | 269   | 0.54            | 0.0541                               | 0.0027                              | 0.2428 | 0.0125                              | 0.0324 | 0.0010                               | 376                                 | 113 | 221                                 | 10 | 205 | 6 | 92            |
|      | 6      | 9     |                 |                                      | 27                                  |        | 25                                  |        | 0                                    |                                     | 3   |                                     |    |     |   |               |
| 43   | 164    | 268   | 0.61            | 0.0494                               | 0.0025                              | 0.2272 | 0.0118                              | 0.0333 | 0.0011                               | 165                                 | 119 | 208                                 | 10 | 211 | 7 | 98            |
|      | 4      | 8     |                 |                                      | 25                                  |        | 18                                  |        | 0                                    |                                     | 9   |                                     |    |     |   |               |
| 89   | 7839   | 11    | 0.20            | 0.0511                               | 0.0028                              | 0.2598 | 0.0130                              | 0.0371 | 0.0011                               | 243                                 | 128 | 235                                 | 10 | 235 | 7 | 99            |
|      | 1      | 1     |                 |                                      | 28                                  |        | 30                                  |        | 0                                    |                                     | 8   |                                     |    |     |   |               |
| 96   | 234    | 1338  | 0.17            | 0.0514                               | 0.0020                              | 0.2752 | 0.0106                              | 0.0387 | 0.0011                               | 257                                 | 89  | 247                                 | 8  | 245 | 7 | 99            |
|      | 4      | 38    |                 |                                      | 20                                  |        | 06                                  |        | 0                                    |                                     | 11  |                                     |    |     |   |               |

| Sp<br>ot | Th      | U       | Isotopic Ratios |                                      |                                     |          |                                     |          |                                      | Isotopic Ages (Ma)                  |      |                                     |      |        |        | Conc   |
|----------|---------|---------|-----------------|--------------------------------------|-------------------------------------|----------|-------------------------------------|----------|--------------------------------------|-------------------------------------|------|-------------------------------------|------|--------|--------|--------|
|          | PP<br>m | PP<br>m | Th/<br>U        | <sup>207</sup> Pb/ <sup>206</sup> Pb | <sup>207</sup> Pb/ <sup>235</sup> U |          | <sup>206</sup> Pb/ <sup>238</sup> U |          | <sup>207</sup> Pb/ <sup>206</sup> Pb | <sup>207</sup> Pb/ <sup>235</sup> U |      | <sup>206</sup> Pb/ <sup>238</sup> U |      | 1<br>σ | 1<br>σ | e<br>% |
|          |         |         |                 |                                      | 1σ                                  | 1σ       | 1σ                                  | 1σ       |                                      | 1σ                                  | 1σ   |                                     |      |        |        |        |
|          |         |         |                 |                                      |                                     |          |                                     |          |                                      |                                     |      |                                     |      |        |        |        |
| 81       | 158     | 623     | 0.25            | 0.0521                               | 0.0027                              | 0.282242 | 0.010393                            | 0.0013   | 300                                  | 120                                 | 252  | 11                                  | 248  | 8      | 98     |        |
| 47       | 759     | 2364    | 0.32            | 0.0516                               | 0.0018                              | 0.281000 | 0.0100                              | 0.039512 | 333                                  | 80                                  | 251  | 8                                   | 249  | 7      | 99     |        |
|          |         |         |                 |                                      |                                     |          |                                     |          |                                      |                                     |      |                                     |      |        |        |        |
| 91       | 103     | 844     | 0.12            | 0.0505                               | 0.0020                              | 0.276402 | 0.0102                              | 0.039812 | 217                                  | 91                                  | 248  | 8                                   | 251  | 7      | 98     |        |
|          |         |         |                 |                                      |                                     |          |                                     |          |                                      |                                     |      |                                     |      |        |        |        |
| 23       | 6912    | 274     | 0.25            | 0.0540                               | 0.0024                              | 0.301731 | 0.01031                             | 0.040612 | 369                                  | 66                                  | 268  | 10                                  | 257  | 7      | 95     |        |
|          |         |         |                 |                                      |                                     |          |                                     |          |                                      |                                     |      |                                     |      |        |        |        |
| 6        | 121     | 351     | 0.35            | 0.0605                               | 0.0020                              | 0.619110 | 0.020                               | 0.074020 | 620                                  | 77                                  | 489  | 13                                  | 460  | 12     | 93     |        |
|          |         |         |                 |                                      |                                     |          |                                     |          |                                      |                                     |      |                                     |      |        |        |        |
| 82       | 117     | 293     | 0.40            | 0.0551                               | 0.0025                              | 0.565440 | 0.020                               | 0.074422 | 417                                  | 100                                 | 455  | 16                                  | 462  | 13     | 98     |        |
|          |         |         |                 |                                      |                                     |          |                                     |          |                                      |                                     |      |                                     |      |        |        |        |
| 7        | 199     | 629     | 0.32            | 0.0555                               | 0.0019                              | 0.579204 | 0.0204                              | 0.075421 | 432                                  | 78                                  | 464  | 13                                  | 468  | 12     | 99     |        |
|          |         |         |                 |                                      |                                     |          |                                     |          |                                      |                                     |      |                                     |      |        |        |        |
| 15       | 107     | 376     | 0.28            | 0.0573                               | 0.0022                              | 0.672457 | 0.0205                              | 0.085525 | 502                                  | 87                                  | 522  | 16                                  | 529  | 15     | 98     |        |
|          |         |         |                 |                                      |                                     |          |                                     |          |                                      |                                     |      |                                     |      |        |        |        |
| 1        | 346     | 611     | 0.57            | 0.0592                               | 0.0020                              | 0.736170 | 0.020                               | 0.089727 | 572                                  | 79                                  | 560  | 16                                  | 554  | 16     | 98     |        |
|          |         |         |                 |                                      |                                     |          |                                     |          |                                      |                                     |      |                                     |      |        |        |        |
| 64       | 131     | 383     | 0.34            | 0.0650                               | 0.0023                              | 1.228340 | 0.040                               | 0.136339 | 772                                  | 79                                  | 814  | 20                                  | 824  | 22     | 98     |        |
|          |         |         |                 |                                      |                                     |          |                                     |          |                                      |                                     |      |                                     |      |        |        |        |
| 30       | 233     | 141     | 1.65            | 0.1100                               | 0.0034                              | 4.810067 | 0.150                               | 0.316893 | 1799                                 | 56                                  | 1787 | 27                                  | 1774 | 45     | 99     |        |
|          |         |         |                 |                                      |                                     |          |                                     |          |                                      |                                     |      |                                     |      |        |        |        |
| 9        | 153     | 297     | 0.51            | 0.0568                               | 0.0045                              | 0.114387 | 0.000                               | 0.014605 | 483                                  | 176                                 | 110  | 8                                   | 93   | 3      | 83     |        |
|          |         |         |                 |                                      |                                     |          |                                     |          |                                      |                                     |      |                                     |      |        |        |        |
| 70       | 142     | 238     | 0.60            | 0.0658                               | 0.0049                              | 0.140096 | 0.000                               | 0.015605 | 1200                                 | 156                                 | 133  | 9                                   | 100  | 3      | 71     |        |
|          |         |         |                 |                                      |                                     |          |                                     |          |                                      |                                     |      |                                     |      |        |        |        |
| 40       | 110     | 99      | 1.11            | 0.0652                               | 0.0072                              | 0.176675 | 0.010                               | 0.018908 | 783                                  | 233                                 | 165  | 15                                  | 121  | 5      | 68     |        |
|          |         |         |                 |                                      |                                     |          |                                     |          |                                      |                                     |      |                                     |      |        |        |        |
| 93       | 319     | 546     | 0.58            | 0.0736                               | 0.0034                              | 0.364655 | 0.010                               | 0.036011 | 1031                                 | 60                                  | 316  | 12                                  | 228  | 7      | 67     |        |
|          |         |         |                 |                                      |                                     |          |                                     |          |                                      |                                     |      |                                     |      |        |        |        |
| 5        | 636     | 166     | 0.38            | 0.0782                               | 0.0067                              | 0.168827 | 0.010                               | 0.016206 | 1151                                 | 175                                 | 158  | 11                                  | 104  | 4      | 58     |        |
|          |         |         |                 |                                      |                                     |          |                                     |          |                                      |                                     |      |                                     |      |        |        |        |
| 73       | 812     | 12      | 0.66            | 0.0917                               | 0.0167                              | 0.206979 | 0.010                               | 0.018907 | 1461                                 | 320                                 | 191  | 15                                  | 120  | 5      | 54     |        |
|          |         |         |                 |                                      |                                     |          |                                     |          |                                      |                                     |      |                                     |      |        |        |        |
| 90       | 420     | 1062    | 0.40            | 0.0800                               | 0.0047                              | 0.172395 | 0.000                               | 0.015705 | 1198                                 | 115                                 | 161  | 8                                   | 101  | 3      | 53     |        |
|          |         |         |                 |                                      |                                     |          |                                     |          |                                      |                                     |      |                                     |      |        |        |        |



| Sp<br>ot | Th      | U       | Th/<br>U | Isotopic Ratios                      |                                     |        |                                     |        |                                      | Isotopic Ages (Ma)                  |     |                                     |    |                |   | Conc |
|----------|---------|---------|----------|--------------------------------------|-------------------------------------|--------|-------------------------------------|--------|--------------------------------------|-------------------------------------|-----|-------------------------------------|----|----------------|---|------|
|          | PP<br>m | PP<br>m |          | <sup>207</sup> Pb/ <sup>206</sup> Pb | <sup>207</sup> Pb/ <sup>235</sup> U |        | <sup>206</sup> Pb/ <sup>238</sup> U |        | <sup>207</sup> Pb/ <sup>206</sup> Pb | <sup>207</sup> Pb/ <sup>235</sup> U |     | <sup>206</sup> Pb/ <sup>238</sup> U |    | Danc<br>e<br>% |   |      |
|          |         |         |          |                                      | 1σ                                  | 1σ     | 1σ                                  | 1σ     | 1σ                                   | 1σ                                  | 1σ  |                                     |    |                |   |      |
|          |         |         |          |                                      |                                     |        |                                     |        |                                      |                                     |     |                                     |    |                |   |      |
| 71       | 67      | 183     | 0.36     | 0.0889                               | 0.0059                              | 0.4153 | 0.0232                              | 0.0343 | 0.0011                               | 1411                                | 123 | 353                                 | 17 | 218            | 7 | 52   |
| 31       | 61      | 78      | 0.78     | 0.0877                               | 0.0076                              | 0.3911 | 0.0350                              | 0.0322 | 0.0013                               | 1376                                | 139 | 335                                 | 26 | 205            | 8 | 51   |
| 75       | 53      | 170     | 0.31     | 0.1075                               | 0.0173                              | 0.1733 | 0.0189                              | 0.0145 | 0.0008                               | 1767                                | 298 | 162                                 | 16 | 93             | 5 | 45   |
| 18       | 96      | 98      | 0.98     | 0.0998                               | 0.0126                              | 0.2331 | 0.0258                              | 0.0186 | 0.0009                               | 1621                                | 237 | 213                                 | 21 | 119            | 6 | 43   |
| 32       | 63      | 194     | 0.32     | 0.1048                               | 0.0067                              | 0.2329 | 0.0149                              | 0.0163 | 0.0006                               | 1710                                | 123 | 213                                 | 12 | 104            | 4 | 31   |
| 83       | 1010    | 1472    | 0.69     | 0.1266                               | 0.0070                              | 0.1843 | 0.0096                              | 0.0107 | 0.0004                               | 2051                                | 98  | 172                                 | 8  | 68             | 2 | 13   |

Note: Age data with the concordance less than 90% are marked in blue color; Data are arranged in ascending order of  $^{206}\text{Pb}/^{238}\text{U}$  age.
